# Supplementary material
Source: publisher figshare collection journal article supplement (https://brill.figshare.com/articles/dataset/_/3443090)
Supplement: Supplementary file 1 [file 1]

# **Supplementary materials to “A Central Asian Language Survey: Collecting Data, Measuring Relatedness and Detecting Loans”**

**Mennecier, Philippe, John Nerbonne, Evelyne Heyer, and Franz Manni**

**Supplementary Table S2: IPA transcription of the 88 questionnaires based on 176 words according to the 207-word Swadesh list**

**Nota bene:**

When the informant gave several synonymic terms, only one response has been retained.

When the informant misunderstood the question, the answer has been deleted.

Auxiliary verbs have been deleted (Tajik *kardan, dodan,* etc.; Yaghnobi *karak, dodak,* etc.).

**Conventions:**

Informants: Ka = Kazakh – followed by location (see Table 1 and Fig. 1)

Ki = Kyrgyz

KK = Karakalpak

U = Uzbek

T = Tajik

Y = Yaghnobi

Colours:

Green: terms of Turkic origin

Blue: terms of Iranian origin

Yellow: terms of Arabian origin

Red: terms of Russian origin

Words followed by the same capital letter (A, B, etc.) are considered cognates.

**Test sites (see Table 1):**

Uzbekistan: Agalyk, Gazli, Halqabad, Hitoy, Kamangaron, Kokdarya, Novmetan, Orday, Raushan, Rishtan, Shege,
Soy Mahalla (Andizhan), Zarmanak, Kaptarhona;

Kyrgyzstan: Akmuz, Barskoon, Kulanak, Tamga;

Tajikistan: Dugova, Navdi, Nimich, Nushor, Safedorak, Shink, Urmetan, Urtoqqishloq.

| **Informant** | **one** | | **two** | | **three** | | **four** | | **five** | | **big** | | **long** | | **wide** | | **thick** | |
| --- | --- | --- | --- | --- | --- | --- | --- | --- | --- | --- | --- | --- | --- | --- | --- | --- | --- | --- |
| **Ka-Gazli 1** | bɪr | A | jekə | A | ʉʃʲ | A | tørt | A | bʲɪs | A | ʉlkɪn | A | ɔzaq | A | kʲeŋ | A | ʒwɒn | A |
| **Ka-Gazli 2** | brɪw | A | jekə | A | ʉʃʲ | A | tørt | A | bʲɪs | A | ʉlkɪn | A | ʉzaq | A | kʲiŋ | A | ʒuwãn | A |
| **Ka-Gazli 3** | bɪrɪw | A | jɪkjew | A | ʉʃʲjʊː | A | twørt | A | bʲes | A | ʉlken | A | kwøwaxə | B |  |  | sʲemɪz̥ | B |
| **Ka-Gazli 4** |  |  | jɪkə | A | ʉʃ | A | tʲørt | A | bʲɪs | A | ʉlken | A | ʉzaq | A | jende | B | sʲeməz̥ | B |
| **Ka-Gazli 5** | brɪw | A | jeka | A | ʉʃ | A | tørt | A | bʲɪs | A | ylken | A | ɔzaq | A | kʲeŋ | A | sʲeməz̥ | B |
| **Ka-Gazli 6** | brɪw | A | jekʲew | A | ʃuː | A | tørtʲew | B | bʲes | A | ʉlken | A | ɔzaq | A | kʲɪŋ | A | qalən | C |
| **Ka-Gazli 7** | bɪr | A | jɪkə | A | ʉʃ | A | tørt | A | bʲɪs | A | ʉlken | A | købrik | C |  |  | sʲemɪz̥ | B |
| **Ka-Raushan 1** | bər | A | jikə | A | yʃ | A | tørt | A | bʲɪs | A | ʉlkɛn | A | uzaq | A | kʲeŋ | A | tɔntaq | D |
| **Ka-Raushan 2** | bər | A | jɪkə | A | yʧ | A | tœrt | A | bʲɪʃ | A | ʉlkɛn | A | uzaq | A | kʲeŋ | A | sʲemɨz̥ | B |
| **Ka-Raushan 3** | bər | A | jɪke | A | øʃ | A | tørt | A | bʲɪs | A | ʉlkən | A | alɨs | D | kʲeŋ | A | sʲemɨz̥ | B |
| **Ka-Raushan 4** | bər | A | jɪkə | A | ʉʃ | A | tørt | A | bʲɪs | A | ʉlken | A | uzaq | A | kʲeŋ | A | sʲemɨz̥ | B |
| **Ki-Akmuz 1** | bir | A | jeki | A | yʧ | A | tort | A | bʲeʃ | A | ʧɔŋ | B | uzɒq | A | deneŋ | C | tɔlɨq | E |
| **Ki-Akmuz 2** | bir | A | jeki | A | yʧ | A | tørt | A | bʲeʃ | A | ʧɔŋ | B | uzɒq | A | ʤazɨ | D | sʲemɪz̥ | B |
| **Ki-Akmuz 3** | bir | A | jeki | A | yʧ | A | tørt | A | bʲeʃ | A | ʧɔŋ | B | køpkø | E |  |  | sʲemiz̥ | B |
| **Ki-Barskoon** | bir̯ | A | jekɪ | A | yʧ | A | tørt | A | bʲɪʃ | A | ʧɔŋ | B | uzɒq | A | kʲɛn | A | ʤɔːn | A |
| **Ki-Kulanak 1** | bir̯ | A | jeki | A | yʧ | A | tørt | A | bʲeʃ | A | ʧɔŋ | B | uzɒq | A | denen | C | tɔlɜq | E |
| **Ki-Kulanak 2** | bir | A | jeki | A | yʧ | A | tørt | A | bʲeʃ | A | ʧɔŋ | B | uzɒq | A | ʤazɨ | D | sʲemɨz̥ | B |
| **Ki-Kulanak 3** | bir | A | jeki | A | yʧ | A | tørt | A | bʲeʃ | A | ʧɔŋ | B | uzɒχ | A | denen | C | sʲemiz̥ | B |
| **Ki-Kulanak 4** | bir | A | jeki | A | yʧ | A | tørt | A | bʲeʃ | A | ʧɔŋ | B | uzɒq | A | ʤazɨ | D | ʤɔːn | A |
| **Ki-Kulanak 5** | bir | A | jeki | A | yʧ | A | tørt | A | bʲeʃ | A | ʧɔŋ | B | uzɔʁ | A | deneŋ | C | sʲemɨz̥ | B |
| **Ki-Orday 1** | bɪr | A | jikʲe | A | ʉʧ | A | tørt | A | bʲeʃ | A | ʧɔŋ | B | uzɒq | A | kʲeŋ | A | ʒɔːn | A |
| **Ki-Orday 2** | bər | A | ɛkkɪ | A | yʧ | A | tør | A | bʲeʃ | A | katta | C | uzɒq | A | kʲɪŋ | A | sʲemɨs | B |
| **Ki-Orday 3** | bɪʃ | A | ɛkʲɪ | A | yʧ | A | tørt | A | bʲeʃ | A | ʧɔŋ | B | alɨs | D | kʲeŋ | A | sʲemɨs | B |
| **Ki-Orday 4** | biʃ | A | ɛkkʲɪ | A | yʧ | A | tørt | A | bʲeʃ | A | ʧɔŋ | B | alɨs | D |  |  | sʲemɨz̥ | B |
| **Ki-Tamga** | bir | A | jeke | A | yʧ | A | tørt | A | bʲeʃ | A | ʧɔŋ | B | uzɒq | A | kʲɛn | A | ʤɔːn | A |
| **KK-Halqabad 1** | bər | A | jɪkɐ | A | ʉʃ | A | tørt | A | bʲes | A | ʉlken | A |  |  | kʲeŋ | A | sʲemɨz̥ | B |
| **KK-Halqabad 2** | bər | A | jɪkɐ | A | ʉʃ | A | tørt | A | bʲes | A | ʉlken | A | uzaq | A | kʲeŋ | A | sʲemɨz̥ | B |
| **KK-Halqabad 3** | bər | A | jɪkə | A | ʉʃ | A | tørt | A | bʲes | A | ʉlkøn | A | uzaq | A | kʲeŋ | A | ʒʊwan | A |
| **KK-Kokdarya 1** | bər | A | jekke | A | yʧ | A | tœrt | A | bʲeʃ | A | ʉlgən | A | uzaq | A | kʲeŋ | A | sʲemɨz̥ | B |
| **KK-Kokdarya 2** | bər | A | jika | A | ʉʃ | A | tœrt | A | bʲɪs | A | ʉlken | A | ʊzaq | A | kʲɪŋ | A | sʲemɨz̥ | B |
| **KK-Kokdarya 3** | bər | A | jɪkʲe | A | yʧ | A | tørt | A | bʲɪs | A | katta | C | uzaq | A | kʲeŋ | A | sʲemɨz̥ | B |
| **KK-Kokdarya 4** | bər | A | jekə | A | ʉʃ | A | tørt | A | bʲes | A | ʉlken | A | uzaq | A | kʲeŋ | A | qalən | C |
| **KK-Shege 1** | bər | A | jɪkɐ | A | ʉʃ | A | twørt | A | bʲɪs | A | ʉlkən | A | uzaq | A | kʲɪŋ | A | sʲemɪz̥ | B |
| **KK-Shege 2** | bər̯ | A | jɪkɐ | A | ʉʃ | A | tørt | A | bʲɪs | A | ʉlkən | A | uzaq | A | kʲeŋ | A | tɔlq | E |
| **KK-Shege 3** | bər | A | jɪkɐ | A | ʉʃ | A | tørt | A | bʲɪs | A | ʉlken | A | uzaq | A | kʲeŋ | A | ʒʊwan | A |
| **KK-Shege 4** | bər | A | jɪkɐ | A | ʉʃ | A | tørt | A | bʲɪs | A | ʉlkʲen | A | ʊzaq | A |  |  | tɔlpaq | J |
| **U-Hitoy 1** | bɪr | A | jɪkə | A | yʧ | A | tørt | A | bʲɪʃ | A | ʉlkən | A | uzaq | A | kʲeŋ | A | sʲemɪz̥ | B |
| **U-Hitoy 2** | ber | A | jɪkɐ | A | ʉʧ | A | tørt | A | bʲɪs | A | ʉlken | A | ʊzaq | A | kʲeŋ | A | sʲemɨz̥ | B |
| **U-Hitoy 3** | bər | A | jɪkɐ | A | ʉʃ | A | tørt | A | bʲɪs | A | ʉlkɛn | A |  |  | kʲeŋ | A | sʲemɨz̥ | B |
| **U-Novmetan 3** | bɪr | A | ikkʲe | A | uʧ | A | tʉrt | A | bɪʃ | A | qapta | C | uzɔq | A | keŋ | A | jɔɣɔn | A |
| **U-Soy Mahalla 1** | bər | A | ikkʲe | A | yʧ | A | tør | A | bʲeʃ | A | katta | C |  |  | kʲɪŋ | A | jɔɣɔn | A |
| **U-Soy Mahalla 2** | bər | A | ikkʲe | A | yʧ | A | tør | A | bʲeʃ | A | katta | C | uzɔq | A | kʲeŋ | A | sʲeməz̥ | B |
| **U-Soy Mahalla 3** | bər | A | ikkʲe | A | yʧ | A | tørt | A | bʲeʃ | A | katta | C | uzaq | A | kʲeŋ | A | sʲemɨz̥ | B |
| **U-Urtoqqishloq 1** | bɪr | A | ikkʲe | A | ʉʧ | A | tʉrt | A | bʲeʃ | A | katta | C | uzɔqtan | A | kʲeŋ | A | sʲemɪz̥ | B |
| **U-Urtoqqishloq 2** | bɪr | A | ikta | A | uʃta | B | tʉrta | B | bʲeʃta | B | katta | C | uzɒq | A | kʲeŋ | A | jʉɣɔn | A |
| **U-Urtoqqishloq 3** | bɪr | A | ikkʲe | A | ʉʧ | A | tʉrt | A | bɪs | A | katta | C | uzɔq | A | kʲɛn | A | sʲemɪz̥ | B |
| **U-Urtoqqishloq 4** | bɪr | A | ikkʲɪ | A | ʉʧ | A | tʉrt | A | bɪs | A | katta | C | uzaq | A | kɪŋ | A | sʲemɪz̥ | B |
| **U-Zarmanak 3** | bɪr | A | ikki | A | uʧ | A | tʉrt | A | bʲɪʃ | A | qapta | C | uzɔq | A | kʲeŋə | A | semiz̥ | B |
| **U-Zarmanak 4** | bər | A | ikkʲe | A | uʧ | A | tʉrt | A | bɪʃ | A | qapta | C | uzɔq | A | kiŋ | A | qalən | C |
| **T-Agalyk** | jak | B | du | B | sʲɛ | C | ʧahɔr | C | panʤ | C | kalɔn | D | mudat[[1]](#footnote-2) | H | pahan | M | ɣasp | H |
| **T-Kamangaron 1** | jak | B | du | B | se | C | ʧɔr | C | panʒ | C | kalɔn | D | dur | I | vasʲe | N | ɣasp | H |
| **T-Kamangaron 2** | jak | B | du | B | se | C | ʧɔr | C | panʒ | C | kalɔn | D | dur | I | vasʲe | N | ɣasp | H |
| **T-Kamangaron 3** | jakta | C | duttə | C | setta | D | ʧɔrta | D | panʒta | D | kalɔn | D | dur | I | vasʲe | N | ɣasp | H |
| **T-Kamangaron 4** | jak | B | dʊ | B | sʲe | C | ʧɔr | C | panʒ | C | kalɔ̴̃n | D | darɔxt | J | vasʲe | N | ɣaft | H |
| **T-Kaptarhona 1** | jak | B | dø | B | se | C | ʧɔːr | C | panʤ | C | katta | C | dərɔz | J | kʃɔt | O | ɣaus | H |
| **T-Kaptarhona 2** | jak | B | dʊ | B | sɛ | C | ʧahɔr | C | panʒ | C | katta | C | dur | I | kuʃɔt | O | farbi[[2]](#footnote-3) | K |
| **T-Kaptarhona 3** | jak | B | dø | B | se | C | ʧɔr | C | panʒ | C | katta | C | dur | I | kʃɔt | O | farbi | K |
| **T-Kaptarhona 4** | jak | B | dø | B | sʲe | C | ʧɔr | C | panʒ | C | katta | C | dur | I | kʃɔt | O | ɣaus | H |
| **T-Kaptarhona 5** | jak | B | dø | B | sʲɛ | C | ʧɔr | C | panʒ | C | katta | C | dur | I | kʃɔt | O | farbi | K |
| **T-Navdî 1** | jak | B | du | B | se | C | ʧɔr | C | panʤ˳ | C | kalɔn | D | darɔz | J | ɣafs | P | farbe | K |
| **T-Navdî 2** | jaktə | C | dutɐ | C | sʲetɐ | D | ʧɔrtə | D | panʃtɐ | D | kalɔn | D | bisjɔr | K | pahn | M | ɣafs | H |
| **T-Navdî 3** | jaktɐ | C | dʉtɐ | C | sʲetɐ | D | ʧɔrtɐ | D | panʃtɐ | D | kalɔn | D | darɔz | J | pahan | M | ɣafs | H |
| **T-Nimich 1** | jak | B | dʊ | B | se | C | ʧɔr | C | panʒ | C | kalɔn | D | bisjɔr | K | kalɔn | Q | ɣafs | H |
| **T-Nimich 2** | jak | B | du | B | se | C | ʧohɔr | D | panʒ | C | kalɔn | D | bisjɔr | K | kuʃoda | R | ɣafs | H |
| **T-Nimich 3** | jak | B | dʊ | B | se | C | ʧɔhɔr | D | panʒ | C | kalɔn | D | darɔz̥ | J | kalɔn | Q | farbe | K |
| **T-Nimich 4** | jak | B | də | B | se | C | ʧɔr | C | panʒ | C | kalɔn | D | darɔz̥ | J | pahn | M | ɣafs | H |
| **T-Novmetan 1** | jakta | C | dutta | C | sʲeta | D | ʧɔrta | D | panʲʒta | D | kalɔn | D | mʉl | L | darɔz | ʃ | ɣaɣs | H |
| **T-Novmetan 2** | jak | B | du | B | se | C | ʧɔr | C | panʒ | C | kalɔn | D | mʉlvaxt[[3]](#footnote-4) | L | vasi | N | ɣaus | H |
| **T-Nûshor 1** | jak | B | dø | B | se | C | ʧɔr | C | panʒ | C | kalɔn | D | darɔz | J | kuʃɔd | O | ɣaβs | H |
| **T-Nûshor 2** | jak | B | du | B | se | C | ʧɔr | C | panʒ | C | kalɔn | D | bisjɔr | K | pahn | M | farbe | K |
| **T-Nûshor 3** | jak | B | dø | B | se | C | ʧɔr | C | panʒ˳ | C | kalɔn | D | drɔz | J | kʃɔt | O | ɣaws | H |
| **T-Rishtan 1** | jak | B | dø | B | sʲe | C | ʧɔr | C | panʒ | C | kalɔn | D | dur | I | farɔq | T | farbʲe | K |
| **T-Rishtan 2** | jak | B | du | B | se | C | ʧɔr | C | panʒ | C | kalɔn | D |  |  | farɔq | T | ɣaβs | H |
| **T-Rishtan 3** | jaktə | C | dyttə | C | sʲeta | D | ʧɔrta | D | panʃta | D | kalɔn | D | dur | I | vasʲe | N | ɣaws | H |
| **T-Shink 1** | jak | B | døː | B | seː | C | ʧɔr | C | panʒ | C | bisjɔr | E | bisjɔr | K | kʃɔt | O | ɣaws | H |
| **T-Shink 2** | jakta | C | døtta | C | seˑta | D | ʧɔrta | D | panʒta | D | kalɔn | D | dur | I | vase | N | ɣafs | H |
| **T-Shink 3** | jak | B | døː | B | sʲeː | C | ʧɔˑr | C | panʒ | C | kalɔn | D | dur | I | vasʲe | N | ɣafs | H |
| **T-Urmetan 1** | jak | B | du | B | se | C | ʧɔr | C | panʒ | C | kalɔn | D | darɔz̥ | J | vase | E | ɣafs | H |
| **T-Urmetan 2** | jak | B | du | B | se | C | ʧɔr | C | panʒ | C | kalɔn | D |  |  | vase | E | ɣafs | H |
| **T-Urmetan 3** | jaktɒ | C | døttɒ | C | seta | D | ʧɔr | C | panʒ | C | kalɔn | D | davɔmnɔk[[4]](#footnote-5) | O | vase | E | ɣafs | H |
| **T-Urmetan 4** | jak | B | dyː | B | se | C | ʧɔr | C | panʒ | C | bisjɔr | E | bisjɔr | K |  |  | ɣafs | H |
| **T-Zarmanak 1** | jakta | C | duttɐ | C | sʲeta | D | ʧɔrta | D | panʧ | C | kalɔn | D | dur | I | vasʲe | E | ɣul | L |
| **T-Zarmanak 2** | jak | B | du | B | sʲe | C | ʧɔr | C | panʧ | C | kalɔn | D | dur | I | sʲerbar | L | ɣavs | H |
| **Y-Dugova 1** | iː | D | dʊː | B | saraj | E | safɔr | C | panʒ | C | kalɔn | D | darɔz | J | kuʃɔd | F | ɣafs | H |
| **Y-Dugova 2** | iː | D | døː | B | traj | E | tufɔːr | C | panʧ | C | katta | C | ɣer | M | kuʃɔd | F | ɣafs | H |
| **Y-Safedorak 1** | iː | D | dʊ | B | tʲiraj | E | tʊfɔr | C | panʧ | C | katta | C | ɣer | M | kʊʃɔd | F | ɣafs | H |
| **Y-Safedorak 2** | iː | D | dʉ | B | traj | E | tfuːr | C | panʧ | C | katta | C | ɣɪːr | M | kʊʃɔd | F | ɣafs | H |
| **Y-Safedorak 3** | iː | D | dʊː | B | tɪraj | E | tfɔːr | C | panʧ | C | katta | C | dirʊ van | N | kɪʃɔd | F | ɣafs | H |

| **Informant** | **heavy** | | **small** | | **short** | | **narrow** | | **thin** | | **woman** | | **man** | | **person** | | **child** | |
| --- | --- | --- | --- | --- | --- | --- | --- | --- | --- | --- | --- | --- | --- | --- | --- | --- | --- | --- |
| **Ka-Gazli 1** | awər | A | kiʃkɪnʲe | A | qɨsqa | A | tar | A | ʒiŋʃkʲe | A | ajɪł | A | jɪrkek | A | adam | A | naristʲe | B |
| **Ka-Gazli 2** | awər | A | kiʃkʲene | A | qəsqa | A | ʒiŋʃkʲe | B | ʒʉqa | B | ajɪł | A | jɪrkek | A | adam | A | bala | A |
| **Ka-Gazli 3** | awɜr | A | kiʃkʲenʲe | A | qsxa | A | tar | A | ʒoqa | B | ajɪł | A | jɪrkɪk | A | adam | A | bala | A |
| **Ka-Gazli 4** | awɜr | A | kiʃkenʲe | A | qsqa | A | tar | A | ʒʉqa | B | ajɪl | A | jɪrkek | A | adam | A | bala | A |
| **Ka-Gazli 5** | awɜr | A | kiʃkenʲe | A | qɨsqa | A | tar | A | ʒʉqa | B | ajɪl | A | jɪrkek | A | adam | A | bala | A |
| **Ka-Gazli 6** | awɜr | A | kiʃkɪnʲe | A | qɨsqa | A | tar | A | ʒʉqa | B | ajɪl | A | jɪrkek | A | adam | A | bala | A |
| **Ka-Gazli 7** | awɜr | A | azlaq | M | qɨsqa | A | ʒiŋʃkʲe | B |  |  | ajel | A | jɪrkɪk | A | adam | A | bala | A |
| **Ka-Raushan 1** | awər | A | kɪʃkʲenʲe | A | qɨsχa | A | tar | A | ʒʊχa | B | ɛjɪl | A | jɛrkek | A | adam | A | bala | A |
| **Ka-Raushan 2** | awɨr | A | kəʃkʲentɛ | B | qəsχa | A | tar | A | ʒʊqa | B | ajɪl | A | jer | B | adam | A | bala | A |
| **Ka-Raushan 3** | awɨr | A | kɨʃkʲentaj | B | qɨsqa | A | tar | A | ʒɪmɨʃkʲe | A | ajɪl | A | jerkɛk | A | adam | A | bala | A |
| **Ka-Raushan 4** | awɨr | A | kɪʃkʲɛntaj | B | qɨsχa | A | tar | A | ʒɪmʃkʲe | A | hajel | A | jɛr | B | adam | A | bala | A |
| **Ki-Akmuz 1** | ɔːr | A | kiʧinɛ | D | qɨsqa | A | iʧkɛ | B | ʤuqa | B | ajal | A | erkɛk | A | kiʃe | C | bala | A |
| **Ki-Akmuz 2** | ɔːr | A | kiʧinɛ | D | qɨsqa | A | iʧkɛ | B | iʧkɛ | A | ajal | A | erkɛk | A | adam | A | bala | A |
| **Ki-Akmuz 3** | salmaqtɨ | B | kiʧinɛke | D | qɨsqa | A | iʧkɛ | B | iʧkɛ | A | ajal | A | ɛrkɛk | A | adam | A | bala | A |
| **Ki-Barskoon** | ɔːr | A | kiʧinɛ | D | qɨsqa | A | tar | A | iʧkɛ | A | ajal | A | jerkek | A | adam | A | bala | A |
| **Ki-Kulanak 1** | ɔːr | A | kiʧinɛ | D | qɨsqa | A | kʊːʃ | D | iskɛ | A | ajal | A | jɛrkɛk | A | adam | A | bɒla | A |
| **Ki-Kulanak 2** | ɔːr | A | kiʧinɛ | D | qɨsqa | A | kuːʃ | D | iʧkɛ | A | ajal | A | ɪrkɛk | A | adam | A | bala | A |
| **Ki-Kulanak 3** | ɔːr | A | kiʧinɛ | D | qɨsqa | A | kuːʃ | D | iʧkɛ | A | ajal | A | ɛrkɛk | A | adam | A | bala | A |
| **Ki-Kulanak 4** | ɔːr | A | kiʧinɛ | D | qɨsqa | A | tar | A | iʧkɛ | A | ajal | A | ɛrkɛk | A | adam | A | bala | A |
| **Ki-Kulanak 5** | ɔːr | A | kiʧinɛ | D | qɨsqa | A | tar | A | ʤuqa | B | ajal | A | ɛrkɛk | A | adam | A | bala | A |
| **Ki-Orday 1** | salmaqtʊ | B | kiʧik | E | kalta | B | tɔr | A | ʒʲuka | B | ajal | A | ɪrkɛk | A | adam | A | bala | A |
| **Ki-Orday 2** | ɔːr | A | kiʧinɛ | D | kalta | B | tɒr | A |  |  | ajal | A | ɪrkɛk | A | adam | A | bɒla | A |
| **Ki-Orday 3** | ɔːr | A | kiʧinɛgɛ | D |  |  | tar̯ | A |  |  | ajal | A | ɪrkek | A | adam | A | bɒla | A |
| **Ki-Orday 4** | ɔːr | A | kiʧinʲɛ | D | qɨsqa | A | taʃ | A | ʤuka | B | ajal | A | ɪrkɛk | A | adam | A | bɒlɒ | A |
| **Ki-Tamga** | ɔːr | A | kiʧinɛ | D | qɨsqa | A | iʧkɛ | B | ʤuqa | B | ajal | A | ɛrkɛk | A | adam | A | bala | A |
| **KK-Halqabad 1** | awər | A | kiʃkʲɛntaj | B | qɨsxaʃa | A | ʒiŋiʃkʲe | B | ʒuqa | B | hajal | A | jer | B | adam | A | bala | A |
| **KK-Halqabad 2** | awər | A | kiʃkene | A | qɨsxa | A | ʊzʊn | C | tʊmbaq | D | hajal | A | jer | B | adam | A | bala | A |
| **KK-Halqabad 3** | awʊr | A | kiʃkantaj | B | qɨsxa | A | ʒiŋiʃkʲe | B | ʒuqa | B | ajal | A | jɪrkek | A | adam | A | bala | A |
| **KK-Kokdarya 1** | awɜr | A | kiʧkene | A | qɨsqa | A | tar | A | ʤuɣa | B | ajel | A | jerkɛk | A | adam | A | bala | A |
| **KK-Kokdarya 2** | awɜr | A | kiʃkenʲe | A | qɨsqa | A | tar | A | ʒɨŋʃkɪ | A | hajal | A | jerkɛk | A | insan | B | bala | A |
| **KK-Kokdarya 3** | awər | A | kiʃkene | A | qɨsqa | A | tar | A | jupqa | B | ajal | A | erkæk | A | adam | A | bala | A |
| **KK-Kokdarya 4** | awər | A | kiʃkʲentaj | B | kʲelte | B | tar | A | ʒʊqa | B | hajal | A | jɛr | B | adam | A | bala | A |
| **KK-Shege 1** | awɜr | A | kiʃkinʲɛ | A | kelte | B | ʒiŋʃke | B | ʒiŋʃke | A | hajal | A | jerkɛk | A | insan | B | bala | A |
| **KK-Shege 2** | awɨr | A | kiʃkinɛ | A | qɨsχa | A | ʒiŋʃke | B | ʒiŋʃkine | E | hajal | A | jer | B | adam | A | bala | A |
| **KK-Shege 3** | awɨr | A | kiʃkʲenʲɛ | A | kʲelte | B | tar | A | ʃʊqa | B | hajal | A | jer | B | adam | A | bala | A |
| **KK-Shege 4** | awɨr | A | kiʃkʲɛntaj | B | kʲeltʲe | B | uzun | C | ʒɨŋʃkine | E | hajal | A | jerkek | A | adam | A | bala | A |
| **U-Hitoy 1** | awɨr | A | kiskinʲɛ | A | qɨsqa | A | tar | A | ʤuqa | B | ajel | A | jerkɛk | A | adam | A | bala | A |
| **U-Hitoy 2** | awrʊ | A | kiʧkenʲɛ | A | kɛlte | B | tar | A | ʤoqa | B | ajel | A | jerkɛk | A | adam | A | bala | A |
| **U-Hitoy 3** | awər | A | kiskinʲɛ | A | qɨsqa | A | tar | A | ʤiŋiske | A | ajel | A | jerkɛk | A | adam | A | bala | A |
| **U-Novmetan 3** | ɔɣər | A | kiʧik | E | kalta | B | ingiʧka | B | majin | F | ajɔl | A | ɛrkak | A | ɔdam | A | bola | A |
| **U-Soy Mahalla 1** | ɔɣər | A | kiʧik | E | kalta | B | tɔr | A |  |  | ajɔl | A | ɪrkak | A | insɒn | B | bɔla | A |
| **U-Soy Mahalla 2** | ɔɣər | A | kiʧkɪnɛ | A | kalta | B | tɔr | A | iŋiska | A | ajɔl | A | ɪrkɛk | A | ɔdam | A | bɔla | A |
| **U-Soy Mahalla 3** | ɔɣər | A | kiʧkɪnɐ | A | kalta | B | iŋiʧkɐ | B | jupka | B | ajɔl | A | erkɛk | A | ɔdam | A | bɔla | A |
| **U-Urtoqqishloq 1** | wɔɣər | A | kɪʧkina | A | qałta | B | qs̩ka | E | ingiʧka | A | ajɔł | A | jerkak | A | ɔdam | A | bɔla | A |
| **U-Urtoqqishloq 2** | ɔɣər | A | kɪʧɪk | E | qs̩ka | A | qs̩ka | E | jypqa | B | ajɔł | A | erkak | A | ɔdam | A | bɔla | A |
| **U-Urtoqqishloq 3** | ɔɣər | A | kɪʧɪk | E | qs̩ka | A | ingiʧka | B | jypqa | B | ajɔł | A | erkæk | A | ɔdam | A | bɔla | A |
| **U-Urtoqqishloq 4** | ɔɣər | A | kɪʧkina | A | qs̩ka | A | ingiʧka | B | jypqa | B | xɔtɨn | B | erkæk | A | ɔdam | A | bɔla | A |
| **U-Zarmanak 3** | ɔɣər | A | kʧik | E | kałta | B | tɔr | A | jypqa | B | ajɔł | A | ɪrkak | A | ɔdam | A | bola | A |
| **U-Zarmanak 4** | ɔɣər | A | kiʧik | E | kalta | B | tɔr | A | ingiʧkə | A | ajɔl | A | ɪrkak | A | ɔdam | A | bola | A |
| **T-Agalyk** | vazmin | C | xuld | L | kutɔh | F | taŋ | N | bɔrik | K | zan | G | mard | G | ɔdam | A | gʊdak | F |
| **T-Kamangaron 1** | vazmin | C | majda | J | kytɔh | F | bɔrik | M | tunuk | L | zajif | I | mardak | H | ɔdam | A | gødak | F |
| **T-Kamangaron 2** | vazbin | C | majda | J | kalta | B | taŋk | N | tunuk | L | zajif | I | mard | G | ɔdam | A | baʧa | G |
| **T-Kamangaron 3** | vazbin | C |  |  | mazik | G | bɔrik | G |  |  | zajif | I | mard̥ | G | ɔdam | A | baʧa | G |
| **T-Kamangaron 4** | vazbin | C | majda | J | kølta | B | bɔrik | G |  |  | zajif | I | mard̥ | G | ɔdam | A | baʧa | G |
| **T-Kaptarhona 1** | vazmin | C | majdahak | K | kalta | B | tank | N | bɔrik | K | zanak | J | mardak | H | ɔdam | A | kudak | F |
| **T-Kaptarhona 2** | vazmin | C | majda | J | kalta | B | tɔr | A | bɔrik | K | zan | G | mard | G | ɔdam | A | gudak | F |
| **T-Kaptarhona 3** | vazmin | C | majdahak | K | kalta | B | borʲik | G | borʲik | K | zanak | J | mardak | H | ɔdam | A | kudak | F |
| **T-Kaptarhona 4** | vazbin | C | majdahak | K |  |  | kam[[5]](#footnote-6) | I | bɔrik | K | zanak | J | mardak | H | ɔdamzɔt | A | lulak | H |
| **T-Kaptarhona 5** | vazmin | C | majdahak | K | kalta | B | kam | I | bɔrik | K |  |  | mardak | H | ɔdam | A | kudak | F |
| **T-Navdî 1** | vazmin | C | majda | J | kutɔh | F | taŋ˳ | N | tunuk | L | zanak | J | mard | G | ɔdam | A | kudak | F |
| **T-Navdî 2** | vazmin | C |  |  | kutɔh | F | bɔrik | G | tunuk | L | zanak | J | mardak | H | ɔdam | A | kudak | F |
| **T-Navdî 3** | vazmin | C | majda | J | kalta | B | bɔrik | G | bɔrik | K | zanak | J | mard | G | ɔdam | A | kudak | F |
| **T-Nimich 1** | vazmin | C | majda | J | kalta | B | bɔrik | G | bɔrik | K | zanak | J | mardak | H | ɔdam | A | kudak | F |
| **T-Nimich 2** | vazmin | C | majda | J | kutɔh | F | bɔrik | G | tunuk | L | zan | G | mard | G | ɔdam | A | kudak | F |
| **T-Nimich 3** | vazmɪn | C | xʊd̥ | L | kutah | F | taŋ | N | pɔrik | K | zan | G | mard | G | ɔdam | A | kudak | F |
| **T-Nimich 4** | vazmin | C | majda | J | kutah | F | bɔrik | G | paʧəq | M | zanak | J | mardak | H | ɔdam | A | kudak | F |
| **T-Novmetan 1** | vazbin | C | majda | J | kałta | B |  |  |  |  | zan | G |  |  | ɔdam | A | baʧa | G |
| **T-Novmetan 2** | vazbin | C |  |  | kalta | B | pɔrik | G |  |  | zan | G | mard | G | ɔdam | A | baʧa | G |
| **T-Nûshor 1** | vazmɪn | C | majda | J | kutɔh | F | bɔrik | G | bɔrik | K | zan | G | mard | G | ɔdam | A | kudak | F |
| **T-Nûshor 2** | vazmin | C | xʊrd | L | kutɔh | F | pɔrik | G | pɔrik | K | zan | G | mard | G | ɔdam | A | kudak | F |
| **T-Nûshor 3** | vazmin | C | majda | J | kutah | F | bɔrik | G | tʉnʉk | L | zanak | J | mardak | H | ɔdam | A | kudak | F |
| **T-Rishtan 1** | vazmɪn | C | majda | J |  |  | taŋ | N | xarɔp | N | zanak | J | mardak | H | ɔdam | A | baʧa | G |
| **T-Rishtan 2** | vazmin | C | majda | J | kalta | B | tɔr | A | bɔrik | K | zan | G | mard | G | ɔdam | A | baʧa | G |
| **T-Rishtan 3** | vazmɪn | C | majda | J | kalta | B | kutɔh | O | bɔrik | K | zanak | J | mardak | H | ɔdam | A | baʧa | G |
| **T-Shink 1** | vazmin | C | majdik | J | kalta | B | taŋ | N | bɔri | K | zan | G | mardak | H | ɔdam | A | baʧa | G |
| **T-Shink 2** | vazmin | C | majda | J | kutɔh | F | taŋ | N | bɔrik | K | zan | G | mard | G | ɔdam | A | baca | G |
| **T-Shink 3** | vazmin | C | xʉrd | L | kutɔh | F | taŋ | N | bɔrik | K | zan | G | mard | G | ɔdam | A | baʧa | G |
| **T-Urmetan 1** | vazbin | C | majda | J | kałta | B | boˑrik | G | xarob̥ | N | zanak | J | mardak | H | ɔdam | A | baʧa | G |
| **T-Urmetan 2** | vazmin | C | majda | J | kutɔh | F | boˑrik | G | xarob̥ | N | zanak | J | mard | G | ɔdam | A | kudak | F |
| **T-Urmetan 3** | vazmin | C | majdajak | K | kutɔh | F | taŋ˳ | N | bɔrik | K | zan | G | mard | G | ɔdam | A | kudak | F |
| **T-Urmetan 4** | vazmin | C |  |  | kalta | B | kalta | P | bɔrik | K | zanak | J | mardak | H | ɔdam | A | baʧa | G |
| **T-Zarmanak 1** | vazbin | C | majda | J | kalta | B | borik | G | tunuk | L | zajif | I | mard | G | ɔdam | A | baʧa | G |
| **T-Zarmanak 2** | vazbin | C | majda | J | kalta | B | kambar | Q | xarɔb̥ | N | zan | G | mard̥ | G | ɔdam | A | baʧa | G |
| **Y-Dugova 1** | vazmin | C | majdak | J |  |  | hɔrd | R | tunuk | L | zaifa | I | mardak | H | ɔdam | A | kudak | F |
| **Y-Dugova 2** | vazmin | C | majdahak | K | kalta | B | tank | N | bɔrik | K | zaifa | I | mɔrtit | I | ɔdam | A | pulla | J |
| **Y-Safedorak 1** | vazmin | C | majdahak | K | kalta | B | tank | N | boˑrik | K | zaifa | I | mɔrtit | I | ɔdam | A | pulla | J |
| **Y-Safedorak 2** | vazmin | C | majda | J | kalta | B | tank | N | boˑrik | K | zaifa | I | mʊrti | I | ɔdam | A | pʊlla | J |
| **Y-Safedorak 3** | vazmin | C | majda | J | kalta | B | tank | N | borik | K | zaifa | I | mardak | H | ɔdam | A | kudak | F |

| **Informant** | **wife** | | **husband** | | **mother** | | **father** | | **animal** | | **fish** | | **bird** | | **dog** | | **louse** | |
| --- | --- | --- | --- | --- | --- | --- | --- | --- | --- | --- | --- | --- | --- | --- | --- | --- | --- | --- |
| **Ka-Gazli 1** | ajɪł | A | kyjəw | A | ana | A | akʲe | A | ʒanwar | A | bɒləq | A | qʊs | A | it | A |  |  |
| **Ka-Gazli 2** | ajɪł | A | jɪrkek | B | ʃɪʃe | B | akʲe | A | hajβɔn | B | baləq | A | qʊs | A | it | A | bit | A |
| **Ka-Gazli 3** | ajɪł | A | bajɪm | C | ana | A | akʲe | A | maw | C | balɜq | A | qʊs | A | it | A | bit | A |
| **Ka-Gazli 4** | ajɪl | A | kʉjew | A | ana | A | akʲe | A | ʒanwar | A | balɜq | A | qʉs | A | it | A | bit | A |
| **Ka-Gazli 5** | qatɪn | B | kʉjew | A | ana | A | akʲe | A | ʒanwar | A | balɜq | A | qʊs | A | it | A | bit | A |
| **Ka-Gazli 6** | ajelə | A | kʉjwə | A | ana | A | akʲe | A | mal | C | balɜq | A | qʊs | A | it | A | bit | A |
| **Ka-Gazli 7** |  |  | kɨjəw | A | ana | A | akʲe | A | hajvon | B | balɜq | A | qʊs | A | it | A | bit | A |
| **Ka-Raushan 1** | ɛjɪl | A | jɪrkɛk | B | ana | A | akʲe | A | ʒanɨβar | A | balɜq | A | kʉs | A | it | A | pit | A |
| **Ka-Raushan 2** | qatɨn | B | kʉjəwɪ | A | ana | A | akʲe | A | ʒanβar | A | balɜq | A | qʊs | A | it | A | bit | A |
| **Ka-Raushan 3** | qatɨn | B | jer | D | ana | A | akʲe | A | hajwan | B | balɜq | A | kʊs | A | it | A | bit | A |
| **Ka-Raushan 4** | hajel | A | jer | D | ana | A | ata | B | hajwan | B | balɜq | A | kʊs | A | it | A | bit | A |
| **Ki-Akmuz 1** | ajal | A | kyjœː | A | ɛnɛ | A | ata | B | mal | C | balɨq | A | ʧimʧiq | B | itʲ | A | bit | A |
| **Ki-Akmuz 2** | ajal | A | gyjøː | A | ɛnɛ | A | ata | B | ajvan | B | balɨq | A | kuʃ | A | itʲ | A | bit | A |
| **Ki-Akmuz 3** | ajal | A | ɛr | D | ɛnɛ | A | ata | B | mal | C | balɨq | A | qanattø | D | it | A | bit | A |
| **Ki-Barskoon** | aja | A | kyjœː | A | enɛ | A | ata | B | ʤanɨβar | A | balɨq | A | qanattuː | D | it | A | bit | A |
| **Ki-Kulanak 1** | ajal | A | kyjøː | A | apa | C | ata | B | mal | C | balɨq | A | kuʃ | A | itʲ | A | bit | A |
| **Ki-Kulanak 2** | ajal | A | gyjøː | A | ɛne | A | ata | B | ʤanɨβar | A | balɨq | A | ʧimʧik | B | itʲ | A | bit | A |
| **Ki-Kulanak 3** | ajal | A | gyjøː | A | enɛ | A | ata | B | ajβan | B | balɨq | A | ʤimʧiq | B | itʲ | A | bit | A |
| **Ki-Kulanak 4** | ajal | A | gyjøː | A | ɛne | A | ata | B | mal | C | balɨq | A | ʧimʧik | B | itʲ | A | bit | A |
| **Ki-Kulanak 5** | ajal | A | gyjøː | A | ɛne | A | ata | B | ʤanɨβar | A | balɨq | A | ʤimʧik | B | itʲ | A | bit | A |
| **Ki-Orday 1** | katɨn | B | er | D | ɛnɛ | A | ata | B | ʒanɨβar | A | balɨq | A | kuʃ | A | it | A | pit | A |
| **Ki-Orday 2** | xɔtɨn | B | er | D | ɒpa | C | ɒta | B | hajβan | B | balɨq | A | kuʃ | A | it | A | pit | A |
| **Ki-Orday 3** | ajal | A | ɪrkɛk | B | enɛ | A | ata | B | ajβan | B | balɜq | A | kuʃ | A | it | A | pit | A |
| **Ki-Orday 4** | ajal | A | eʃ | D | ɒpa | C | ata | B | hajβan | B | balɨq | A | kuʃ | A | it | A | pit | A |
| **Ki-Tamga** | ajal | A | kyjøː | A | ɛnɛ | A | ata | B | ajvan | B | balɨq | A | ʧimʧik | B | it | A | bit | A |
| **KK-Halqabad 1** | hajal | A | jer | D | ana | A | akʲe | A | hajwɒn | B | balɜq | A | qʊs | A | it | A | bit | A |
| **KK-Halqabad 2** | hajal | A | jer | D | ana | A | akʲe | A | hajwɒn | B | balɜq | A | qʊs | A | it | A | bit | A |
| **KK-Halqabad 3** | ajal | A | jer | D | ana | A | aɣa | C | hajwɒn | B | balɜq | A | qʊs | A | it | A | bit | A |
| **KK-Kokdarya 1** | ajel | A | kʉjʊw | A | ana | A | ata | B | hajwɔn | B | balɜq | A | kus | A | it | A | bit | A |
| **KK-Kokdarya 2** | hajalɨ | A | kʉjəwɨ | A | ana | A | akʲe | A | hajwɒn | B | balɜq | A | kus | A | it | A | bit | A |
| **KK-Kokdarya 3** | qatɨn | B | jɛr | D | ana | A | ata | B | hajwɒn | B | balɜq | A | kuʃ | A | it | A | bit | A |
| **KK-Kokdarya 4** | hajal | A | jɛr | D | ana | A | akʲe | A | hajwɒn | B | balɜq | A | kus | A | it | A | bit | A |
| **KK-Shege 1** | zajif | C | kɪjʊ | A | ana | A | akʲe | A | hajwan | B | balɜq | A | qʊs | A | it | A | bit | A |
| **KK-Shege 2** | qatɨn | B | jer | D | ana | A | akʲe | A | hajwɔn | B | balɜq | A | qʊs | A | it | A | bit | A |
| **KK-Shege 3** | hajal | A | kɪjʊ | A | ana | A | akʲe | A | hajwan | B | balɜq | A | qʊs | A | it | A | bit | A |
| **KK-Shege 4** | hajɪle | A | kɪjʊvɐ | A | ana | A | akʲe | A | hajwan | B | balɜq | A | qʊs | A | it | A | bit | A |
| **U-Hitoy 1** | xatɨn | B | jer | D | ana | A | aɣa | C | hajwɔn | B | balɜq | A | kʊʃ | A | it | A | bit | A |
| **U-Hitoy 2** | ajel | A | kɪjʊ | A | apa | C | akʲe | A | hajwan | B | balɜq | A | qʉʃ | A | it | A | bit | A |
| **U-Hitoy 3** | ajel | A | kɪjʊ | A | ana | A | akʲe | A | hajvɔn | B | balɜq | A | qʉs | A | it | A | ptʲe | A |
| **U-Novmetan 3** | xɔtɪn | B | er | D | ɔna | A | ɔta | B | hajvɔn | B | balɨq | A | kuʃ | A | it | A | ʃubəʃ | B |
| **U-Soy Mahalla 1** | xɔtɨn | B | ɛrrɛ | D | ɔna | A | ɔta | B | hajβɔn | B | balɨq | A | paranda | C | it | A | bit | A |
| **U-Soy Mahalla 2** | xɔtɨn | B | er | D | ɔna | A | ɔta | B | hajvɔn | B | balɜq | A | paranda | C | it | A | pit | A |
| **U-Soy Mahalla 3** | xɔtɨn | B | er | D | ɔna | A | ɔta | B | hajwɔn | B | balɜq | A | kuʃ | A | it | A | pit | A |
| **U-Urtoqqishloq 1** | xɔtɪn | B | jer | D | ɔna | A | ɔta | B | hajwɔn | B | baləq | A | kʊʃ | A | [kəʧək](mailto:k@t_S@k) | B | pɪt | A |
| **U-Urtoqqishloq 2** | xɔtɪn | B | jer | D | ɔna | A | ɔta | B | hajvɔn | B | balɜq | A | kʊʃ | A | kʊʧuk | B | bɪt | A |
| **U-Urtoqqishloq 3** | xɔtən | B | jer | D | ɔna | A | ɔta | B | hajwɔn | B | balɜq | A | kʊʃ | A | kʊʧuk | B | pɪt | A |
| **U-Urtoqqishloq 4** | xɔtɪn | B | jer | D | ɔna | A | ɔta | B | hajvɔn | B | balɜq | A | kʊʃ | A | kʊʧuk | B | bɪt | A |
| **U-Zarmanak 3** | xotɨn | B | er | D | ɔna | A | ɔta | B | hajvɔn | B | balɛq | A | kuʃ | A | it | A | bit | A |
| **U-Zarmanak 4** | xɔtɨn | B | er | D | ɔna | A | ota | B | hajvɔn | B | balɨq | A | kuʃ | A | it | A | bit | A |
| **T-Agalyk** | zan | K | ʃuː | I | mɔdar | D | padar | G | hajvɔn | B | mɔhi | B | paranda | C | kuʧuk | B | ʃabuʃ | B |
| **T-Kamangaron 1** | zan | K | ʃawhar | J | mɔdar | D | padar | G | hajvɔn | B | mahi | B | parandan | C | sak | E |  |  |
| **T-Kamangaron 2** | zan | K | ʃøː | I | biː | F | dada | H | hajvɔn | B | mɔhi | B | parənda | C | kuʧuk | B | ʃaβuʃ | B |
| **T-Kamangaron 3** | zajif | C | mard | L | ɔna | A | dada | H | hajvɔn | B | mahi | B | murɣ˳[[6]](#footnote-7) | E | kuʧuk | B |  |  |
| **T-Kamangaron 4** | zan | K | mard | L | biː | F | dada | H | hajvɔn | B | mahi | B | kuʃ | A | kuʧuk | B | ʃaβuʃ | B |
| **T-Kaptarhona 1** | zan | K | ʃuː | I | buβa | F | dada | H | hajvʊn | B | maji | B | paranda | C | kʧøk | B |  |  |
| **T-Kaptarhona 2** | zan | K | ʃʊw | I | modar | D | padar | G | hajvʊn | B | mɔhi | B | paranda | C | sak | E | bit | A |
| **T-Kaptarhona 3** | zan | K | ʃuː | I | modar | D | padar | G | hajwon | B | mahi | B | kuʃ | A | sag˳ | E |  |  |
| **T-Kaptarhona 4** | zan | K | ʃʊː | I | buva | F | padar | G | hajvɔn | B | mahi | B | paranda | C | sak | E | ʃipəʃ | B |
| **T-Kaptarhona 5** | zan | K | ʃuː | I | buwa | F | dada | H | hajvun | B | mahi | B | paranda | C | kʧok | B | ʃəpʃ | B |
| **T-Navdî 1** | zan | K | mard̥ | L | ɔʧa | G | padar | G | hajvɔn | B | mɔhiː | B | paranda | C | sag˳ | E | ʃapuʃ | B |
| **T-Navdî 2** | zanak | L | ʃawhar | J | ɔʧa | G | padar | G | hajvɔn | B | mɔhiː | B | paranda | C | sag | E | ʃəpəʃ | B |
| **T-Navdî 3** | zan | K | mard | L | mʊdar | D | padar | G | hajvɔn | B | mɔhiː | B | paranda | C | sag˳ | E |  |  |
| **T-Nimich 1** | zan | K | ʃuː | I | mɔdar | D | padar | G | hajβɔn | B | mahiˑ | B | paranda | C | sag˳ | E |  |  |
| **T-Nimich 2** | zan | K | mardina | L | mɔdar | D | padar | G | hajvɔn | B | mɔhi | B | paranda | C | sag | E |  |  |
| **T-Nimich 3** | zan | K | ʃawhar | J | mɔdar | D | padar | G | hajvɔn | B | mahi | B | paranda | C | sag˳ | E | ʃabuʃk | B |
| **T-Nimich 4** | zan | K | mard | L | aʧa | G | avvɔ[[7]](#footnote-8) | F | hajwɔn | B | mɔhi | B | paranda | C | sag | E | ʃpəʃ | B |
| **T-Novmetan 1** | zan | K | ʃʉj | I | ɔna | A | dada | H | hajvɔn | B | mahi | B | murəɣ˳ | E | kuʧuk | B |  |  |
| **T-Novmetan 2** | zan | K | mard | L | ɔna | A | dada | H | zindene | H | maji | B | gundiʃk[[8]](#footnote-9) | F | kuʧuk | B | ʃubuʃk | B |
| **T-Nûshor 1** | zanak | L | mardak | M | ɔʧa | G | padar | G | hajβɔn | B | mɔhi | B | mʊrɣ˳ | E | sag | E | ʃpəʃ | B |
| **T-Nûshor 2** | zan | K | ʃawhar | J | mɔdar | D | padar | G | hajvɔn | B | mɔhi | B | paranda | C | sag | E |  |  |
| **T-Nûshor 3** | zan | K | ʃʊː | I | aʧa | G | aβɔ | F | hajvɔn | B | mahi | B | paranda | C | sag˳ | E | ʃəpəʃ | B |
| **T-Rishtan 1** | zan | K | ʃuː | I | bøvi | F | dødɔ | H | hajwɔn | B | mahiˑ | B | paranda | C | kuʧik | B | ʃøʃ | C |
| **T-Rishtan 2** | zan | K | ʃuː | I | bəvə | F | dɔdɔ | H | hajβɔn | B | balək | A | ʧɪmʧɪk | B | kuʧuk | B | ʃyʃ | C |
| **T-Rishtan 3** | zanak | L | ʃuː | I | bøvø | F | dada | H | hajvɔn | B | mɔhi | B | paranda | C | kuʧuk | B |  |  |
| **T-Shink 1** | zan | K | mard | L | mɔdar | D | padar | G | hajvɔn | B | mɔhi | B | paranda | C | sag˳ | E | sabəsk | B |
| **T-Shink 2** | zan | K | mard | L | ɔca | G | dɔdɔ | H | hajvɔn | B | mɔhɪ | B | paranda | C | sag˳ | E | ʃabəʃ | B |
| **T-Shink 3** | zan | K | ʃʊj | I | mɔdar | D | padar | G | hajvɔn | B | mɔhɪ | B | paranda | C | sag˳ | E | ʃaβəʃ | B |
| **T-Urmetan 1** | zan | K | mardak | M | ɔʧa | G | padar | G | hajvɔn | B | mɔhɪ | B | paranda | C | kʊʧuk | B | ʃʉbyʃ | B |
| **T-Urmetan 2** | zan | K | mardak | K | mɔdar | D | padar | G | hajvɔn | B | mɔhɪ | B | paranda | C | sag | E | ʃabuʃ | B |
| **T-Urmetan 3** | zan | K | mardak | K | mɔdar | D | padar | G | hajvɔn | B | mɔhi | B | paranda | C | sag˳ | E | ʃabyʃ | B |
| **T-Urmetan 4** | zan | K | mardak | K | apa | C | dɔdɔ | H | hajvɔ̃n | B | mɔhi | B |  |  | kyʧyk | B | ʃəbyʃ | B |
| **T-Zarmanak 1** | zajif | C | ʃʉj | I | ɔna | A | ɔta | B | hajvɔn | B | mahi | B | paranda | C | kuʧuk | B | ʃubuʃk | B |
| **T-Zarmanak 2** | zan | K | ʃʉj | I | ɔna | A | ɔta | B | hajvɔn | B | mahi | B | ʧumʧuq | B | kuʧuk | B | ʃubuʃk | B |
| **Y-Dugova 1** | inʧ | M | vir | N | ɔʧa | G | dɔdɔ | H | hajvɔn | B | mahiː | B | siʧa | G | kʊt | C |  |  |
| **Y-Dugova 2** | inʧ | M | vir | N | ɔʧa | G | dɔdɔ | H | hajvɔn | B | mɔhiː | B | siʧa | G | kʊt | C | ʃʊpʊʃ | B |
| **Y-Safedorak 1** | inʧ | M | vir | N | ɔʧa | G | dɔdɔ | H | hajvon | B | mɔhiː | B | siʧa | G | kʊt | C | ʃupuʃ | B |
| **Y-Safedorak 2** | inʧ | M | vir | N | ɔʧa | G | dɔdɔ | H | hajvɔn | B | mɔhiː | B | siʧa | G | kʊt | C | ʃʊpʊʃ | B |
| **Y-Safedorak 3** | inʧ | M | vir | N | ɔʧa | G | dɔdɔ | H | hajvʊn | B | mahiː | B | siʧa | G | kʊt | C | ʃʊpʊʃ | B |

| **Informant** | **butterfly** | | **snake** | | **worm** | | **tree** | | **forest** | | **stick** | | **fruit** | | **seed** | |
| --- | --- | --- | --- | --- | --- | --- | --- | --- | --- | --- | --- | --- | --- | --- | --- | --- |
| **Ka-Gazli 1** | kʊbʲelɛk | A | ʒɨlan | A | qurt | A | aɣaʃ | A | wɔrman | A | tajaq | A | ʒʲemɪs | A | dæn | A |
| **Ka-Gazli 2** | købʲelʲɛk | A | ʒəlan | A | qurt | A | aɣaʃ | A | wʊrmon | A | tajaq | A | ʒemɪs | A | tuxum | B |
| **Ka-Gazli 3** | kubʲelʲɛk | A | ʒəlan | A | qurt | A | aɣaʃ | A | urman | A | tajaq | A | ʒɪms | A | uruq | C |
| **Ka-Gazli 4** | kʊbʲelʲɛk | A | ʒəlan | A | qurt | A | aɣaʃ | A | urman | A | tajaq | A | ʒimɪs | A | dan | A |
| **Ka-Gazli 5** | kʊbʲelʲɛk | A | ʒəlan | A | qurt | A | daraq | B | wɔrman | A | aɣaʃ | B | ʒimɪs | A | dæn | A |
| **Ka-Gazli 6** | købʲelʲɛk | A | ʒəlan | A | qurt | A | aɣaʃ | A | wɔrman | A | tajaq | A | ʒemɪs | A | dæn | A |
| **Ka-Gazli 7** | købʲelʲɛk | A | ʒlan | A |  |  | daraq | B | wɔrman | A | aɣaʃ | B | ʒemɪs | A | txʊm | B |
| **Ka-Raushan 1** | købelʲek | A | ʒɪlan | A | qʊrt | A | aɣaʃ | A | tɔɣɔj | B | tajaq | A | ʒʲemɪs | A | txɨm | B |
| **Ka-Raushan 2** | købʲelʲɛk | A | ʒɪlan | A | qʊrt | A | aɣaʃ | A | tɔɣɔj | B | tajaq | A | ʒʲemɪs | A | txʊm | B |
| **Ka-Raushan 3** | købʲelʲɛk | A | ʒlan | A | qʊrt | A | aɣaʃ | A | wʊrman | A | tajaq | A | ʒʲemɪs | A | txʊm | B |
| **Ka-Raushan 4** | købʲelʲɛk | A | ʒlan | A | qʊrt | A | aɣaʃ | A | tɔɣɔj | B | tajaq | A | ʒʲemɨs | A | tqʊm | B |
| **Ki-Akmuz 1** | køpøløk | A | ʤɨlan | A | sølʤan | C | baq | C | tɔqɔj | B | tajaq | A | ʤemɪʃ | A | yrøn | D |
| **Ki-Akmuz 2** | køpøløk | A | ʤɨlan | A | sølʤan | C | baq | C | tɔqɔj | B | tajaq | A | ʤemɪʃ | A | arpa | E |
| **Ki-Akmuz 3** | gøpøløk | A | ʤɨlan | A | sølʤɨlan | C | baq | C | tɔqɔj | B | tajaq | A | ʤemɪʃ | A | arpa | E |
| **Ki-Barskoon** | køpøløk | A | ʤɨlan | A | qurt | A | baq | C | tɔqɔj | B | tajaq | A | ʤemɪʃ | A | yrøn | D |
| **Ki-Kulanak 1** | køpøløk | A | ʤɨlan | A | kurt | A | baq | C | tɔqɔj | B | sɔjl | C | ʤemɪʃ | A | uruq | C |
| **Ki-Kulanak 2** | køpøløk | A | ʤɨlan | A | kurt | A | daraq | B | tɔqɔj | B | tajaq | A | ʤemɪʃ | A | uruq | C |
| **Ki-Kulanak 3** | køpøløk | A | ʤɨlan | A | arbaq | D | baq | C | tɔqɔj | B | tajaq | A | ʤemɪs | A | uruq | C |
| **Ki-Kulanak 4** | køpøløk | A | ʤɨlan | A | qurt | A | baq | C | tɔqɔj | B | ʤɨgaʧ | D | ʤemɪs | A | yrøn | D |
| **Ki-Kulanak 5** | gøpøløk | A | ʤɨlan | A | kurt | A | baq | C | tɔqɔj | B | tajaq | A | ʤemɪs | A | uruk | C |
| **Ki-Orday 1** | køpølɛk | A | ʤɪlan | A | qurt | A | daraq | B | tɔqɔj | B | tajak | A | mʲɪva | B | uruk | C |
| **Ki-Orday 2** | køpølɛk | A | ʤɪlan | A | ilanʧuβak | B | darax | B | wɔrman | A | ʤiɣaʧ | D | mʲɪva | B | uruk | C |
| **Ki-Orday 3** | køpølɛk | A | ʒɨlan | A | qurt | A | darax | B | urman | A | ʤiɣaʧ | D | mʲevʲe | B |  |  |
| **Ki-Orday 4** | køpølɛk | A | ʤɨlan | A | ʧuβalʧaŋ | E | daraq | B | tɔqɔj | B | ʤiɣaʧ | D |  |  |  |  |
| **Ki-Tamga** | køpøløk | A | ʤɨlan | A | kurt | A | daraq | B | tɔqɔj | B | ʤɪgaʧ | D | ʤemɪʃ | A | uruk | C |
| **KK-Halqabad 1** | gʊbʲelʲɛk | A | ʒɪlan | A | qʊrt | A | tʲerɛk | B | tɔɣɔj | B | aɣaʃ | B | miβø | B | txʊm | B |
| **KK-Halqabad 2** | gʊbʲelʲek | A | ʒlan | A | ʒɔːŋɣʊrt | G | tʲerek | B | tɔɣaj | B | aɣaʃ | B | miβø | B | txʊm | B |
| **KK-Halqabad 3** | gʊbʲelʲɛk | A | ʒɨlan | A | qʊrt | A | tʲerɛk | B | tɔɣɔj | B | tajaq | A | miβø | B | txʊm | B |
| **KK-Kokdarya 1** | gøbʲelɛk | A | ʒɪlan | A | qʊrt | A | tʲerɛk | B | tɔɣɔj | B |  |  | miva | B | txʊm | B |
| **KK-Kokdarya 2** | gøbʲelʲɛk | A | ʒɨlan | A | qʊrt | A | tʲerɛk | B | tɔɣaj | B | aɣaʃ | B | miwe | B | txʊm | B |
| **KK-Kokdarya 3** | kapalak | A | ilan | A | ʧʊβalʧaŋ | E | daraxt | B | ʊrmɔn | A | tajaq | A | ʒemɪs | A | txʊm | B |
| **KK-Kokdarya 4** | gøbʲelʲɛk | A | ʒɨlan | A | qʊrt | A | tʲerek | B | toɣɔj | B | tajaq | A | mʲɪβe | B | txʊm | B |
| **KK-Shege 1** | gøbølʲøk | A | ʒlan | A | qʊrt | A | daraq | B | toɣɔj | B | tajaq | A | miβø | B | txʊm | B |
| **KK-Shege 2** | gʊbʲelʲɛk | A | ʒlan | A | qʊrt | A | tʲerek | B | toɣɔj | B | tajaq | A | miβø | B | txʊm | B |
| **KK-Shege 3** | gʊbʲelʲɛk | A | ʒəlan | A | qʊrt | A | tʲerɛk | B | tɔɣɔj | B | tajaq | A | miβe | B | txʊm | B |
| **KK-Shege 4** | gʊbʲelʲɛk | A | ʒlan | A | qʊrt | A | tʲerɛk | B | tɔɣɔj | B |  |  | miβe | B | txʊm | B |
| **U-Hitoy 1** | kapalɛk | A | ilan | A | qʊrt | A | daraxt | B | wurman | A | tajaq | A | mʲɪvø | B | txʊm | B |
| **U-Hitoy 2** | kapalɛk | A | ʤilan | A | qʊrt | A | tʲerɛk | B | tʊɣaj | B | tajaq | A | mʲɪβe | B | txʊm | B |
| **U-Hitoy 3** | købʲelʲek | A | ʤɪlan | A | qʊrt | A | tʲerɛk | B | tʊɣaj | B | tajaq | A | mʲɪve | B | txʊm | B |
| **U-Novmetan 3** | kapalak | A | ilɔn | A | qurt | A | daraxt | B | ʉrmɔn | A | tajɔq | A | mʲeva | B | urux | C |
| **U-Soy Mahalla 1** | kapalæk | A | ilɔn | A | ʧuβalʧaŋ | E | daraxt | B | urmɔn | A | tajɔq | A | mʲɪva | B | uruɣ˳ | C |
| **U-Soy Mahalla 2** | ʧapalak | A | ilɔn | A | ilanʧuβan | B | daraxt | B | urmɔn | A | tajɔq | A | mʲɪva | B | uruk | C |
| **U-Soy Mahalla 3** | kapalɛk | A | ilɔn | A | ilɔnʧuβan | B | darax | B | urmɔn | A | ʧʉpak | E | mʲɪva | B | uruk | C |
| **U-Urtoqqishloq 1** | kapalak | A | ilɔn | A | kʊrt | A | daraxt | B | ʊrmɔn | A | tajɔq | A | mɪva | B | urux | C |
| **U-Urtoqqishloq 2** | kapalak | A | ilɔn | A | ʧʊwalʧaŋ | E | daraxt | B | ʊrmɔn | A | tajɒq | A | mɪva | B | urux | C |
| **U-Urtoqqishloq 3** | kapalak | A | ilɔn | A | ʧʊwalʧaŋ | E | daraxt | B | urmɔn | A | tajɔq | A | mɪva | B | uruɣ˳ | C |
| **U-Urtoqqishloq 4** | kapalak | A | ilɔn | A |  |  | daraxt | B | urmɒn | A | ʧʊp | F | mɪva | B | uruɣ | C |
| **U-Zarmanak 3** | kapalak | A | ilɔn | A | qurt | A | daraxt | B | yrmɔn | A | tajɔq | A | mʲeva | B | urux | C |
| **U-Zarmanak 4** | kapalak | A | ilɔn | A | qurt | A | daraxt | B | ʉrmɔn | A | tajɔq | A | mʲeva | B | uruɣ˳ | C |
| **T-Agalyk** |  |  | mɔr | B | kirm | I | daraxt | B | bʲeʃa | J | ʧup | F | mʲeva | B | tuxmi | B |
| **T-Kamangaron 1** |  |  | mɔr | B | kirm | I | daraxt | B | urmʊn | A | tajɔq | A | meva | B | urux | C |
| **T-Kamangaron 2** |  |  | mɔr | B | kirm | I | daraxt | B | yrmʊn | A | tajɔq | A | mʲeva | B | txum | B |
| **T-Kamangaron 3** |  |  | mɔr | B | kirm | I | daraxt | B | ørmɔn | A | xɔda[[9]](#footnote-10) | N | mʲeva | B |  |  |
| **T-Kamangaron 4** |  |  | mɔr | B | kirm | I | daraxt | B | ørmɔn | A | kaltak | G | mɪva | B | urux | C |
| **T-Kaptarhona 1** |  |  | mor | B | kirəm | I | daraxt | B | urmɔn | A | nauda[[10]](#footnote-11) | T | meva | B | urɔk | C |
| **T-Kaptarhona 2** |  |  | mɔr | B | kirəm | I | daraxt | B | urmɔn | A | tajɔq | A | meva | B | uruk | C |
| **T-Kaptarhona 3** |  |  | mɔr | B | ʧuwalʧaŋ | E | daraxt | B | murmʊn | A | tajɒq | A | mʲeva | B | urux | C |
| **T-Kaptarhona 4** |  |  | mɔr | B | kirəm | I | daraxt | B | urmʊn | A | ʃɔx | J | mʲeva | B | urux | C |
| **T-Kaptarhona 5** |  |  | mɔr | B | kirm̩ | I | daraxt | B | urmʊn | A | kaltak | O | miva | B | urʊx | C |
| **T-Navdî 1** | paʃaprək | D | mɔr | B | kirm | I | daraxt | B | ʤangal | K | ʧup | F | meva | B | tuxmi | B |
| **T-Navdî 2** | paʃaprək | D | mʊr | B | kirm̩ | I | daraxt | B | ʤangał | K | ʧup | F | meva | B | semeʧka | G |
| **T-Navdî 3** | paʃaprʊk | D | mɔr | B | kirəm | I | daraxt | B | ʤangal | K | ʧup | F | meva | B | dɔnagi | I |
| **T-Nimich 1** | paʃaparak | D | mʊr | B | kərəm | I | daraxt | B | ʤangal | K | dasta | P | meva | B | tuxmi | B |
| **T-Nimich 2** | paʃaparʉk | D | mɔr | B | kirəm | I | daraxt | B | ʤangal | K | ʧub | F | meva | B |  |  |
| **T-Nimich 3** | ʃaparak | E | mɔr | B | kirm | I | daraxt | B | ʤangal | K | dangal | Q | mɪva | B | txm̩ | B |
| **T-Nimich 4** | paʃaparək | D | mɔr | B | kərəm | I | dəraxt | B | ʤangal | K | tɪjɔq | A | meva | B | tuxmi | B |
| **T-Novmetan 1** |  |  | mɔr | B | kirim | I | daraxt | B |  |  | ʧʉp | F | zardolo[[11]](#footnote-12) | H | urux | C |
| **T-Novmetan 2** | ʃapalak | E |  |  | kirm | I |  |  | ʉrmɔn | A | ʧʉp | F | zaldorʊ | H |  |  |
| **T-Nûshor 1** | paʃaparək | D | mɔr | B | kirm̩ | I | daraxt | B | ʤangal | K | ʧupdast | F | meva | B | tuxmi | B |
| **T-Nûshor 2** | paʃaparʉk | D | mɔr | B | kirm̩ | I | daraxt | B | ʤangal | K | kaltak | O | meva | B | tuxmi | B |
| **T-Nûshor 3** | paʃaparək | D | mɔr | B | kirm̩ | I | daraxt | B | ʤangal | K | dangal | Q | meva | B |  |  |
| **T-Rishtan 1** |  |  | mur | B | kərəm | I | daraxt | B | urmɔn | A | kaltak | O | mʲeva | B | dɔn | I |
| **T-Rishtan 2** |  |  | mur | B | kr̩m | I | daraxt | B | urmɔn | A | kaltak | O | mʲeva | B | txum | B |
| **T-Rishtan 3** |  |  | mur | B | kərəm | I | daraxt | B | daraxzɔr | L | kaltak | O | mʲeva | B | dɔn | I |
| **T-Shink 1** | ʃaparak | E | mɔr | B |  |  | daraxt | B | ʤangal | K | ʧɔp | F | meva | B | tʊxm | B |
| **T-Shink 2** | ʃaparak | E | mɔr | B | kirm | I | daraxt | B | ʤangal | K | assɔ | R | meva | B |  |  |
| **T-Shink 3** | ʃaparak | E | mɔr | B | kirm | I | daraxt | B | ʤangal | K | kaltak | O | meva | B | tʊxm | B |
| **T-Urmetan 1** | ʃaparak | E | mɔr | B | kirm | I | daraxt | B | ʤangal | K | assɔ | R | meva | B | tuxm | B |
| **T-Urmetan 2** |  |  | mɔr | B | kirm | I | daraxt | B | ʤangal | K | assɔ | R | meva | B |  |  |
| **T-Urmetan 3** | ʃaparak | E | mɔr | B | kɪrm | I | daraxt | B | ʤangal | K | kaltak | O | meva | B | təxm | B |
| **T-Urmetan 4** |  |  | mɔr | B |  |  | daraxt | B | ʤangal | K | assɔ | R | meva | B |  |  |
| **T-Zarmanak 1** | ʃapalak | E | mɔr | B | kirm | I | daraxt | B | ʉrmɔn | A | tajɔq | A | meva | B | urux | C |
| **T-Zarmanak 2** | kapalak | A | mɔr | B | krɪm | I | daraxt | B | ʉrmɔn | A | ʧʉp | F | meva | B | tuxum | B |
| **Y-Dugova 1** | ʃaparak | E | mɔr | B |  |  | daraxt | B | ʤangal | K | dɔrk | ʃ |  |  | ɣala | J |
| **Y-Dugova 2** | ʃaparak | E | mɔr | B | kirm | I | daraxt | B | ʤangal | K | kaltak | O | meva | B | ɣala | J |
| **Y-Safedorak 1** | saparak | E | mɔr | B | kirm | I | daraxt | B | ʤangal | K | dɔrk | ʃ | mɪva | B | tʊxm | B |
| **Y-Safedorak 2** | saparak | E | mɔr | B | kirm | I | daraxt | B | ʤangal | K | kaltak | O | mɪva | B | tuxmi | B |
| **Y-Safedorak 3** | ʃaparak | E | mʊr | B | kirm | I | daraxt | B | ʤangal | K | dɔrk | ʃ | mɪva | B | tuxəm | B |

| **Informant** | **leaf** | | **root** | | **bark** | | **flower** | | **grass** | | **rope** | | **skin** | | **meat** | |
| --- | --- | --- | --- | --- | --- | --- | --- | --- | --- | --- | --- | --- | --- | --- | --- | --- |
| **Ka-Gazli 1** | ʒapraq | A | təbɨr | A |  |  | gʊl | A | ʃøp | A | ʒʲip | A | tʲerɪ | A | jet | A |
| **Ka-Gazli 2** | parak | B | tamər | A | qabɜq | A | gʊł | A | wɔt | B | ʒɪp | A | tʲerɪ | A | jɪt | A |
| **Ka-Gazli 3** | ʒaprax | A | tamər | A |  |  | gʊł | A | ʃøp | A | ʒɪp | A |  |  | jɪt | A |
| **Ka-Gazli 4** | ʒapraq | A | tamər | A |  |  | gʊł | A | ʃøp | A | arqan | B | tʲerə | A | jɪt | A |
| **Ka-Gazli 5** | ʒapraq | A | tamər | A | qabɜq | A | gʉł | A | ʃøp | A | ʒʲɪp | A | tʲerɪ | A | jet | A |
| **Ka-Gazli 6** | ʒapraq | A | tamər | A | qabɜq | A | gʉł | A |  |  | ʒɪp | A | tʲerɪ | A | jɪt | A |
| **Ka-Gazli 7** | ʒapraq | A | tamər | A |  |  | gʉł | A | ʃøp | A | ʃɪp | A |  |  | jɪt | A |
| **Ka-Raushan 1** | ʒaprak | A | tamɜr | A | qaβɨq | A | kʉl | A | ʃøp | A | ʒip | A | tʲere | A | jet | A |
| **Ka-Raushan 2** | ʒaprak | A | tamɜr | A | qaβɨq | A | gʉl | A | ʃøp | A | arχan | B | tʲere | A | jet | A |
| **Ka-Raushan 3** | ʒaprak | A | tamɜr | A | qaβɨq | A | gʊl | A | ʃøp | A | ʒip | A | tʲere | A | jet | A |
| **Ka-Raushan 4** | ʒaprak | A | tamɜr | A | qaβɨq | A | gʊl | A | ʃɔp | A | ʒip | A | tʲerɛ | A | jet | A |
| **Ki-Akmuz 1** | ʤalbɨrak | A | butaq | B | qaβɨq | A | gyl | A | ʧøp | A | ʤip | A | tere | A | et | A |
| **Ki-Akmuz 2** | ʤalbɨrak | A | tɒmɨr | A | butaq | D | gyl | A | ʧøp | A | arqan | B | terɪ | A | etʲ | A |
| **Ki-Akmuz 3** | ʤalbɨraq | A | tɒmɨr | A | qaβɨq | A | g˳yl | A | ʧøp | A | arqan | B | terɪ | A | jet | A |
| **Ki-Barskoon** | ʤalbɨraq | A | tamɨr | A | qaβʊq | A | g˳ʉl | A | ʧøp | A | ʤip | A | tʲerɪ | A | et | A |
| **Ki-Kulanak 1** | ʤalbɨraq | A | tamɨr | A | qaβɨq | A | gyl | A | ʧøp | A | ʤip | A | tʲerɪ | A | jet | A |
| **Ki-Kulanak 2** | ʤalbɨrak | A | tɒmɨr | A | qaβɨq | A | gʊl | A | ʧøp | A | ʤip | A | terʲe | A | jɪt | A |
| **Ki-Kulanak 3** | ʤalbɨrak | A | tɒmɨr | A | qaβɨq | A | gyl | A | ʧøp | A | ʤip | A | terɪ | A | jet | A |
| **Ki-Kulanak 4** | ʤalbɨraq | A | tɒmɨr | A | qaβɨq | A | g˳yl | A | ʧøp | A | ʤip | A | terɪ | A | jet | A |
| **Ki-Kulanak 5** | ʤalbɨrak | A | tamɨr | A | qaβɨq | A | gyl | A | ʧøp | A | ʤip | A | terɪ | A | etʲ | A |
| **Ki-Orday 1** | ʒapɨrak | A | tamɨr | A | pustlɔq | B | gyl | A | ʧøp | A | ʤip | A | tʲere | A | et | A |
| **Ki-Orday 2** | barg˳ | B | tamər | A | qɒβɔq | A | gyl | A | wɔt | B | ʤip | A | tʲere | A | et | A |
| **Ki-Orday 3** | ʤaprak | A |  |  | qabɨq | A | gyl | A | ʧøp | A | ʤip | A | tʲere | A | et | A |
| **Ki-Orday 4** | barak | B | tamər | A | pʊstlɔq | B | gyl | A | ʧøp | A | ʤip | A | tʲere | A | et | A |
| **Ki-Tamga** | ʤalbɨrak | A | tɒmɨr | A | qaβɨq | A | kʊl | A | ʧøp | A | ʤip | A |  |  | et | A |
| **KK-Halqabad 1** | ʒaprak | A | tɒmɜr | A | qaβɨq | A | gʉl | A | ʃøp | A | ʒip | A | tʲere | A | gʉʃ | B |
| **KK-Halqabad 2** | ʒaprak | A | tøbør | A | qaβɨq | A | gʉl | A | ʃøp | A | arχan | B | tʲere | A | gʉʃ | B |
| **KK-Halqabad 3** | ʒaprak | A | tamɜr | A | qabɨq | A | gʉl | A | ʃøp | A | ʒip | A | tʲere | A | gʉʃ | B |
| **KK-Kokdarya 1** | ʤaprak | A | tamɜr | A | qaβʊq | A | gył | A | wɔtən | B | ʤip | A | tʲere | A | gøʃ | B |
| **KK-Kokdarya 2** | ʒapərak | A | tøbør | A | qabɨq | A | gʊł | A | ʃøp | A | ʒip | A | tʲere | A | gʊʃ | B |
| **KK-Kokdarya 3** | ʒaprak | A | tamɜr | A | qaβɨq | A | gʊl | A | wɔt | B | ʒip | A | tʲere | A | gʊʃ | B |
| **KK-Kokdarya 4** | ʒaprak | A | tamɜr | A | qabɨq | A | gʊl | A | ʃøp | A | ʒip | A | tʲere | A | gʉʃ | B |
| **KK-Shege 1** | ʒaprak | A | tamɜr | A | qaβɨq | A | gʉl | A | ʃøp | A | ʒip | A | tʲere | A | gʉʃ | B |
| **KK-Shege 2** | ʒaprak | A | tøbør | A | qaβɨq | A | gʉl | A | ʃøp | A | ʒip | A | tʲere | A | gʉʃ | B |
| **KK-Shege 3** | ʒaprak | A | tøbør | A | qaβɨq | A | gʉl | A | ʃøp | A | ʒip | A | tʲere | A | gʉʃ | B |
| **KK-Shege 4** | ʒaprak | A | tamɜr | A | qaβɨq | A | gʉl | A | ʃøp | A | arχan | B | tʲere | A | gʉʃ | B |
| **U-Hitoy 1** | ʤaprak | A | tamɜr | A | qaβɨq | A | gʊl | A | wɔt | B | ʤip | A | tʲere | A | gʉʃ | B |
| **U-Hitoy 2** | ʤaparak | A | tamɜr | A | qabɨq | A | gʉl | A | ʧøp | A | ʤip | A | tʲere | A | gʉʃ | B |
| **U-Hitoy 3** | ʤaprak | A | tamɜr | A | qaβɨq | A | gʉl | A | ʃøp | A | ʒip | A | tʲere | A | gʉʃ | B |
| **U-Novmetan 3** | barg˳ | B | reʃa | C | pʉstlɔq | B | gul | A | ʉt | B | arqɔn | B | pʉst | B | gʉʃt | B |
| **U-Soy Mahalla 1** | barg˳ | B | tamər | A | qɔbəq | A | gyl | A | køkat | C | arqɒn | B | tere | A | gʉʃt | B |
| **U-Soy Mahalla 2** | bark | B | tamɜr | A | pʊstlɒq | B | gyl | A | køkat | C | arqɔn | B | tʲerə | A | gʉʃt | B |
| **U-Soy Mahalla 3** | bak | B | tɔmɜr | A |  |  | gyl | A | ɔt | B | ip | A | terə | A | gøʃ | B |
| **U-Urtoqqishloq 1** | barg | B | ildɪz̥ | D | pustlɔq | B | gʉl | A | wɔt | B | arqɔn | B | tere | A | gwʉʃt | B |
| **U-Urtoqqishloq 2** | barg | B | tɒmər | A | pust | C | gʉł | A | wɔt | B | ɪp | A | tʲerʲe | A | gwʉʃt | B |
| **U-Urtoqqishloq 3** | barg˳ | B | ɨldɨz̥ | D | pʊst | C | gʊl | A | wɔt | B | arqɔn | B | tere | A | gʉʃt | B |
| **U-Urtoqqishloq 4** | barg˳ | B | tɔmər | A | qabɜq | A | gʉl | A | wɔt | B | ɪp | A | tere | A | gʉʃt | B |
| **U-Zarmanak 3** | barg | B | ildiz̥ | D | pustlɔq | B | gʊl | A | wʉt | B | ip | A | pʉst | B | gʉʃt | B |
| **U-Zarmanak 4** | barg | B | ildɨs | D | pʉstlɔq | B | gul | A | ʉt | B | ip | A | tɪrə | A | gʉʃt | B |
| **T-Agalyk** | barg | B | rʲeʃa | C | pustlɔq | B | gʊl | A | sabza | G | resmɔn | G | pust | B | guʃt | B |
| **T-Kamangaron 1** | barg˳ | B | rʲeʃa | C | pøst | C | gul | A | alaf | H | respɔ̃n | G | pøst | B | gøʃt | B |
| **T-Kamangaron 2** | barg˳ | B | rʲeʃa | C | pøstlɒq | B | gyl | A | alaf | H | arɣamʧin | H | pøst | B | gøʃt | B |
| **T-Kamangaron 3** | barg˳ | B | rʲeʃa | C |  |  | kul | A | ʧøp | A | rʲespɔ̃n | G | pøst | B | gøʃt | B |
| **T-Kamangaron 4** | b̥arg˳ | B | rʲeʃa | C | pøstlɔq | B | gul | A | alaf | H | arɣamʧin | H | pøst | B | gøʃt | B |
| **T-Kaptarhona 1** | bark | B | tɔmər | A | puslɒq | B | gøl | A | alaf | H | band | I | pust | B | guʃt | B |
| **T-Kaptarhona 2** | bark | B | tɒmər | A | puslɔq | B | gyl | A | alaf | H | band | I | pust | B | guʃt | B |
| **T-Kaptarhona 3** | barg | B |  |  |  |  | gul | A | alaf | H | band | I | pust | B | guʃt | B |
| **T-Kaptarhona 4** | bark | B | tɔmər | A | pustlɒq | B | gøl | A | alaf | H | band | I | pust | B | guʃt | B |
| **T-Kaptarhona 5** | bark | B | reʃa | C | pustlɒq | B | gul | A | alaf | H | band | I | pust | B | guʃt | B |
| **T-Navdî 1** | barg˳ | B | reʃa | B | pust | C | gul | A | alaf | H | band | I | pust | B | gʊʃt | B |
| **T-Navdî 2** | barg˳ | B | reʃa | B | pustlɔq | B | gul | A | alaf | H | band | I | pust | B | guʃt | B |
| **T-Navdî 3** | barg˳ | B | reʃa | B | pustlɔq | B | gul | A | alaf | H | band | I | pust | B | gʊʃt | B |
| **T-Nimich 1** | barg | B | reʃa | B | pust | C | gul | A | alaf | H | band | I | pust | B | gʊʃt | B |
| **T-Nimich 2** | barg | B | reʃa | B | pust | C | guł | A | alaf | H | band | I | pust | B | guʃt | B |
| **T-Nimich 3** | barg | B | reʃa | B | pust | C | gł̩ | A | alaf | H | band | I | pust | B | guʃt | B |
| **T-Nimich 4** |  |  | reʃa | B | pustlɔq | B | gl̩ | A | alaf | H | band | I | pust | B | guʃt | B |
| **T-Novmetan 1** | barg˳ | B | ildiz̥ | D | pʉstlɔq | B | gul | A | alaf | H | rʲespɔ̃ | G | ʧarm | D | gʉʃt | B |
| **T-Novmetan 2** | barg | B | rʲeʃa | B | pʉstlɔq | B | gul | A | alaf | H |  |  | pʉst | B | gʉʃt | B |
| **T-Nûshor 1** | barg | B | reʃa | B | pustlɔq | B | gl̩ | A | alaf | H | band | I | pust | B | guʃt | B |
| **T-Nûshor 2** | barg | B | reʃa | B | pust | C | gʊl | A | alaf | H | band | J | pust | B | guʃt | B |
| **T-Nûshor 3** |  |  | reʃa | B | pust | C | gl̩ | A | alaf | H | band | I | pust | B | guʃt | B |
| **T-Rishtan 1** | barg˳ | B | reʃa | B | pustlɔq | B | gyl | A | alaf | H | arɣamʧin | H | pust | B | guːʃt | B |
| **T-Rishtan 2** | barg | B | reʃa | B | pustlɔq | B | gyl | A | alaf | H | arɣamʧin | H | pust | B | guʃt | B |
| **T-Rishtan 3** | barg˳ | B | rʲeʃa | B | pustlɔq | B | gyl̥ | A | alaf | H | arɣamʧin | H | pust | B | guːʃt | B |
| **T-Shink 1** | barg˳ | B | reʃa | B | pʊst | C | gʉl | A | alaf | H | respɔn | G | pʊst | B | gʊʃt | B |
| **T-Shink 2** | barg˳ | B | reʃa | B | pust | C | gʉl | A | alaf | H | resmɔn | G | pʊʃt | B | gʊʃt | B |
| **T-Shink 3** | barg˳ | B | reʃa | B | pʊstlɔq | B | gʉl | A | alaf | H | resmɔn | G | pʊst | B | guʃt | B |
| **T-Urmetan 1** | barg˳ | B | reʃa | B | pust | C | gʊl | A | alaf | H | arɣamʧin | H | pʊst | B | guʃt | B |
| **T-Urmetan 2** |  |  |  |  | pust | C | gʊl | A | alaf | H | resmɔn | G | pʊst | B | guʃt | B |
| **T-Urmetan 3** | barg˳ | B | reʃa | B | pust | C | gl̩ | A | alaf | H | rɪʃta | J | pʊst | B | guʃt | B |
| **T-Urmetan 4** |  |  | reʃa | B | puslɔq | B | gl̩ | A | alaf | H | respɔn | G | pʊʃt | B | guʃt | B |
| **T-Zarmanak 1** | barɣ | B | reʃa | B | pʉstlɔq | B | gul | A | alaf | H | rɛspɔn | G | pʉst | B | gʉʃt | B |
| **T-Zarmanak 2** | barg˳ | B | ildɨz̥ | D | pʉst | C | gul | A | alaf | H | respɔn | G | pʉst | B | gʉʃt | B |
| **Y-Dugova 1** | barg | B | rɪʃa | B | pʊst | C | gul | A | vajʃ | I | vita | K | pust | B | jota | A |
| **Y-Dugova 2** | barg | B | rɪʃa | B | pʊst | C | gul | A | veʃ | I | vita | K | ʧarm | D | jɔta | A |
| **Y-Safedorak 1** | barg | B | rɪʃa | B | pust | C | gul | A | veʃ | I | vita | K | pust | B | jɔta | A |
| **Y-Safedorak 2** | barg | B | rɪʃa | B | pʊst | C | gul | A | vajʃ | I | vita | K | pust | B | jɔta | A |
| **Y-Safedorak 3** | barg | B | iʧin | H | pʊst | C | gul | A | vajʃ | I | vita | K | pust | B | jɔta | A |

| **Informant** | **blood** | | **bone** | | **fat** | | **egg** | | **horn** | | **tail** | | **feather** | | **hair** | |
| --- | --- | --- | --- | --- | --- | --- | --- | --- | --- | --- | --- | --- | --- | --- | --- | --- |
| **Ka-Gazli 1** | qan | A | syjək | A | maj | A | ʒʊmərtka | A | mʉjəz̥ | A | kʉjrɔq | A | qanat | A | ʃaʃ | A |
| **Ka-Gazli 2** | qan | A | syjək | A | maj | A | ʒʉmərtka | A | myjɪz̥ | A | kʉjrʊq | A | qanat | A | ʃaʃ | A |
| **Ka-Gazli 3** | qan | A | syjək | A | maj | A | ʒʉmurtka | A | myɪz | A | kʉjrɨq | A | pɪrʊ | B | ʃaʃ | A |
| **Ka-Gazli 4** | qan | A | syjək | A | maj | A | ʒʉmurtka | A | myjyz̥ | A | kʉjrʊq | A |  |  | ʃaʃ | A |
| **Ka-Gazli 5** | qan | A | syjək | A | maj | A | ʒʉmɨrtka | A | myjɨz̥ | A | kʉjrɜq | A | mamɔq | C | ʃaʃ | A |
| **Ka-Gazli 6** | qan | A | syjɪk | A | maj | A | ʒʊmɨrtka | A | myjɨz̥ | A | kʉjrɔq | A | qanat | A | ʃaʃ | A |
| **Ka-Gazli 7** | qan | A | syjək | A | maj | A | ʒʉmɨrtka | A | myjɨz̥ | A | kʉjrɔq | A |  |  | ʃaʃ | A |
| **Ka-Raushan 1** | qan | A | syjøk | A | maj | A | ʒʉmɨrtka | A | myjiz̥ | A | qyjrœq | A | pɛr | D | ʃaʃ | A |
| **Ka-Raushan 2** | qan | A | syjək | A | maj | A | mɛjɪk | B | myjyz̥ | A | qyjrɔq | A | pɛr | D | ʃaʃ | A |
| **Ka-Raushan 3** | qan | A | syjøk | A | maj | A | ʒʊmərtka | A | myjyz̥ | A | qyjrɔq | A | qawɔrsɨn | E | ʃaʃ | A |
| **Ka-Raushan 4** | qan | A | sʉjøk | A | maj | A | tqʊm | C | myjyz̥ | A | kyjrɔq | A | ʒɪm | F | ʧas | A |
| **Ki-Akmuz 1** | qan | A | søːjøk | A | maj | A | ʤumurtqa | A | myjyz̥ | A | qʉjruq | A | qanat | A | ʧaʧ | A |
| **Ki-Akmuz 2** | qan | A | sɨːjøk | A | maj | A | ʤumurtqa | A | myjyz̥ | A | qʉjruq | A | qanat | A | ʧaʧ | A |
| **Ki-Akmuz 3** | qan | A | søːjøk | A | maj | A | ʤumurtqa | A | myjyz̥ | A | qujruq | A | qanat | A | ʧaʧ | A |
| **Ki-Barskoon** | qan | A | søːjøk | A | maj | A | ʤumurtqa | A | myjyz̥ | A | qujruq | A | qanat | A | ʧaʧ | A |
| **Ki-Kulanak 1** | qan | A | søːjøk | A | maj | A | ʤumurtqa | A | myjyz̥ | A | qujruq | A | qanat | A | ʧaʧ | A |
| **Ki-Kulanak 2** | qan | A | søːjøk | A | maj | A | ʤumurtqa | A | myjyz̥ | A | kujruk | A | qanat | A | ʧaʧ | A |
| **Ki-Kulanak 3** | qan | A | syːjøk | A | maj | A | ʤumurtqa | A | myjyz̥ | A | qujruq | A | qanat | A | ʧaʧ | A |
| **Ki-Kulanak 4** | qan | A | sʉːjøk | A | maj | A | ʤumurtqa | A | myjyz̥ | A | qujruq | A | pər | D | ʧaʧ | A |
| **Ki-Kulanak 5** | qan | A | søːjøk | A | maj | A | ʤumurtka | A | myjyz̥ | A | qujruq | A | qanat | A | ʧaʧ | A |
| **Ki-Orday 1** | qɔn | A | syjøk | A | mɒj | A | ʒumurtka | A | myjyz̥ | A | qʉjruq | A | pat | D | ʧaʧ | A |
| **Ki-Orday 2** | qɔn | A | syjøk | A | jɔq | B | tuxum | C | ʃɔq | B | qʉjruq | A | pat | D | ʧaʧ | A |
| **Ki-Orday 3** | qɒn | A | søjøk | A | maj | A | ʤumurtka | A | myjyz̥ | A | dym | B | pat | D | ʧaʧ | A |
| **Ki-Orday 4** | qɔn | A | sʉjək | A | maj | A | ʤumurtka | A | myjyz̥ | A | kujruk | A | pat | D | ʧaʧ | A |
| **Ki-Tamga** | qan | A | søːjøk | A | maj | A | ʤumurtqa | A | myjyz | A | qʉjruq | A | qanat | A | ʧaʧ | A |
| **KK-Halqabad 1** | qan | A | sʉjøk | A | maj | A | majik | B | ʃaq | B | qʉjrɔq | A | pær | D | ʃaʃ | A |
| **KK-Halqabad 2** | qan | A | sʉjøk | A | maj | A | majik | B | ʃaq | B | qʉjrɔq | A | par | D | ʃaʃ | A |
| **KK-Halqabad 3** | qan | A | sʉjøk | A | maj | A | majik | B | ʃaq | B | qʉjrɔq | A | pær | D | ʃaʃ | A |
| **KK-Kokdarya 1** | qan | A | syjək | A | maj | A | majɛk | B | ʃaq | B | qyjrɔq | A | par | D | sas | A |
| **KK-Kokdarya 2** | qan | A | syjək | A | maj | A | majɪk | B | ʃaq | B | qʉjrɔq | A | par | D | ʃaʃ | A |
| **KK-Kokdarya 3** | qan | A | syjək | A | maj | A | txʊm | C | ʃaq | B | dʉm | B | par | D | saʃ | A |
| **KK-Kokdarya 4** | qan | A | syjøk | A | maj | A | majek | B | ʃaq | B | qyjrɔq | A | pɛr | D | ʃaʃ | A |
| **KK-Shege 1** | qan | A | syjøk | A | maj | A | majik | B | ʃax | B | qʉjrɔq | A | pær | D | ʃaʃ | A |
| **KK-Shege 2** | qan | A | syjøk | A | maj | A | majik | B | ʃaq | B | qʉjrɔq | A | pær | D | ʃaʃ | A |
| **KK-Shege 3** | qan | A | syjøk | A | maj | A | majik | B | ʃaq | B | qʉjrɔq | A | pær | D | ʃaʃ | A |
| **KK-Shege 4** | qan | A | sʉjøk | A | maj | A | majik | B | myjɪz̥ | A | qʉjrɔq | A | par | D | ʃaʃ | A |
| **U-Hitoy 1** | qan | A | sʉjøk | A | maj | A | majɪk | B | ʃax | B | qyjrɔq | A | pær | D | ʧaʧ | A |
| **U-Hitoy 2** | qan | A | sʉjøk | A | maj | A | majɪk | B | ʃax | B | qyjrɔq | A | pær | D | ʧaʧ | A |
| **U-Hitoy 3** | qan | A | sʉjøk | A | maj | A | majɪk | B | ʃax | B | qʉjrɔq | A | par | D | ʧaʃ | A |
| **U-Novmetan 3** | qɔn | A | sujak | A | jɔɣ | B | txum | C | ʃɔx | B | dum | B |  |  | sɔʧ | A |
| **U-Soy Mahalla 1** | qɔn | A | syjæk | A | jɔɣ | B | txʊm | C | ʃɔq | B | dʉm | B | pat | D | sɔʧ | A |
| **U-Soy Mahalla 2** | qɔn | A | sujak | A | jɔq | B | tuxum | C | sɔx | B | dʉm | B | pat | D | sɒʧ | A |
| **U-Soy Mahalla 3** | qɔn | A | sʉjak | A | jɔq | B | txum | C | ʃɒq | B | dʉm | B | pat | D | ʃɔʧ | A |
| **U-Urtoqqishloq 1** | qɔn | A | syjak | A | jɔχ | B | txʊm | C | ʃɔx | B | dʉm | B | pat | D | sɔʧ | A |
| **U-Urtoqqishloq 2** | qɔn | A | syjak | A | mɒj | A | txʊm | C | ʃɒx | B | dʉm | B | pat | D | sɔʧ | A |
| **U-Urtoqqishloq 3** | qɔn | A | syjak | A | jɔχ | B | txʊm | C | ʃɔx | B | dm̩ | B | pat | D | sɔʧ | A |
| **U-Urtoqqishloq 4** | qɔn | A | syjak | A | jog | B | txʊm | C | ʃɒx | B | dʉm | B | par | D | sɔʧ | A |
| **U-Zarmanak 3** | qɔn | A | syjak | A | jɔq | B | tuxum | C | ʃɔx | B | dum | B | qanɔt | A | sɔʧ | A |
| **U-Zarmanak 4** | qɔn | A | syjak | A | jɔʁ | B | txum | C | ʃɔx | B | dum | B | pat | D | sɔʧ | A |
| **T-Agalyk** | xun | A | ustuhɔn | B | rawɣan | E | tuxum | C | ʃɔx | B | dʊm | B | par̯ | D | muj | C |
| **T-Kamangaron 1** | xun | A | ustuhɔn | B | rawɣan | E | txum | C | ʃɔx | B | dum | B | pat | D | møj | C |
| **T-Kamangaron 2** | xʊn | A | ustuxɔn | B | rauɣan | E | tuxum | C | ʃɔx | B | dum | B | pat | D | møj | C |
| **T-Kamangaron 3** | xun | A | uʃtʊhɔn | B | ɣøran | E | txum | C |  |  | dum | B | pʲero | B | mø | C |
| **T-Kamangaron 4** | xʊn | A | ustuhɔn | B | røɣan | E | txum | C | ʃɔx | B | dum | B | par | D | møhɔ | C |
| **T-Kaptarhona 1** | xən | A | ustuhɔn | B | ruhan | E | txəm | C | ʃɔx | B | døm | B | par | D | mʊ | C |
| **T-Kaptarhona 2** | xun | A | istuhɔn | B | rʊhan | E | txum | C | ʃɔx | B | dum | B | pat | D | muj | C |
| **T-Kaptarhona 3** | xun | A | ustuhun | B | rʊɣan | E | txəm | C | ʃɔx | B | dʊm | B |  |  | mu | C |
| **T-Kaptarhona 4** | xən | A | ustuhʊn | B | ruhan | E | txum | C | ʃɔx | B | dʊm | B | pat | D | qil | D |
| **T-Kaptarhona 5** | xən | A | stuɣun | B | ruɣan | E | txum | C | ʃɔx | B | dm̩ | B | pat | D | muh | C |
| **T-Navdî 1** | xun | A | suɣun | B | ravɣan | E | tuxum | C | ʃɔx | B | dm̩ | B | par | D | muj | C |
| **T-Navdî 2** | xun | A | ustuxun | B | ravɣan | E | tuxum | C | ʃɔx | B | dum | B | par | D | muj | C |
| **T-Navdî 3** | xun | A | ustuxɔn | B | ravɣan | E | tuxum | C | ʃɔx | B | dm̩ | B | qanɔt | A | mu | C |
| **T-Nimich 1** | xun | A | ustuɣɔn | B | rʊɣan | E | txum | C | ʃɔx | B | dʊm | B | par | D | mu | C |
| **T-Nimich 2** | xun | A | ustuɣɔn | B | rawɣan | E | tuxum | C | ʃɔx | B | dʊm | B | par | D | mujhɔ | C |
| **T-Nimich 3** | xun | A | astaɣʊn | B | rʊɣan | E | txəm | C | ʃɔx | B | dm̩ | B | par | D | mʊ | C |
| **T-Nimich 4** | xun | A | astaɣʊn | B | ruɣan | E | txəm | C | ʃɔx | B | dm̩ | B | par | D | mʊˑ | C |
| **T-Novmetan 1** | xun | A | syjak | A | rʉhan | E | txum | C | ʃɔx | B | dum | B | paʃ | D | mʉj | C |
| **T-Novmetan 2** | xun | A | ustaɣɔn | B | rʉhan | E | tuxum | C | ʃɔx | B | dum | B | par | D | mʉj | C |
| **T-Nûshor 1** | xun | A | astaɣʊn | B | rawɣan | E | txʊm | C | ʃɔx | B | dm̩ | B | par | D | mʊj | C |
| **T-Nûshor 2** | xun | A | astaɣʊn | B | rawɣan | E | tuxum | C | ʃɔx | B | dʊm | B | par | D | mʊj | C |
| **T-Nûshor 3** | xun | A | astaɣʊn | B | rʊɣan | E | txəm | C | ʃɔx | B | dʊm | B | par | D | mʊ | C |
| **T-Rishtan 1** | xun | A | ystohɔn | B | rʊɣan | E | txum | C | ʃɔx | B | dym | B | par | D | muː | C |
| **T-Rishtan 2** | xʊn | A | ystəɣɔn | B | ruɣan | E | tuxʊm | C | ʃɔx | B | dym | B | pat | D | muː | C |
| **T-Rishtan 3** | xʊn | A | ystəɣɔn | B | raβɣan | E | txʊm | C | ʃɔx | B | døm | B | par | D | mu | C |
| **T-Shink 1** | xn̩ | A | əstʊɣɔn | B | rɔɣan | E | tx̩m | C | ʃɔx | B | dm̩ | B | par | D | mɔj | C |
| **T-Shink 2** | xʊn | A | əstəɣɔn | B | ravɣan | E | tx̩m | C | ʃɔx | B | dm̩ | B | par | D | mʊj | C |
| **T-Shink 3** | xn̩ | A | əstʊxɔn | B | rawɣan | E | tʊxm | C | ʃɔx | B | dm̩ | B | par | D | mʊj | C |
| **T-Urmetan 1** | xʊn | A | ystʊxɔn | B | ravɣan | E | tuxm | C | ʃɔx | B | dʊm | B | par | D | mʊj | C |
| **T-Urmetan 2** | xən | A | ystʊɣɔn | B | ravɣan | E | tuxm | C | ʃɔx | B | dm̩ | B |  |  | mʊj | C |
| **T-Urmetan 3** | xn̩ | A | ystəxɔn | B | ravɣan | E | tx̩m | C | ʃɔx | B | dm̩ | B | par | D | mʊj | C |
| **T-Urmetan 4** | xn̩ | A | ustəɣɔn | B | rawɣan | E | tx̩m | C | ʃɔx | B | dm̩ | B |  |  | mʊ | C |
| **T-Zarmanak 1** | xun | A | syjak | A | rʊhan | E | txum | C | ʃɔx | B | dum | B | par | D | mʉj | C |
| **T-Zarmanak 2** | xun | A | ustaxɔn | B | ryxan | E | txum | C | ʃɔx | B | dum | B | pat | D | mʉj | C |
| **Y-Dugova 1** | vaxm̩ | B | stak | C | ruɣʊn | E | tʊxʊm | C | ʃɔx | B | dim | B | qanat | A | paʃm̩ | E |
| **Y-Dugova 2** | vaxm̩ | B | sitak | C | ruɣan | E | tuxm | C | ʃɔx | B | dum | B | par | D | darav | F |
| **Y-Safedorak 1** | vaxm̩ | B | sɪtak | C | ruɣani | E | tuxm̩ | C | ʃɔx | B | dʉm | B | par | D | diraβ | F |
| **Y-Safedorak 2** | vaxm̩ | B | stak | C | ruɣun | E | tʊxum | C | ʃɔx | B | dim | B | par | D | dɪraw | F |
| **Y-Safedorak 3** | vaxm̩ | B | stak | C | ruɣɪn | E | tʊxʊm | C | ʃɔx | B | dim | B |  |  | dɪraβ | F |

| **Informant** | **head** | | **ear** | | **eye** | | **nose** | | **mouth** | | **tooth** | | **tongue** | | **nail** | | **leg** | |
| --- | --- | --- | --- | --- | --- | --- | --- | --- | --- | --- | --- | --- | --- | --- | --- | --- | --- | --- |
| **Ka-Gazli 1** | bas | A | qʊlɒq | A | kwøz̥ | A | mʊrən | A | awʊz̥ | A | tɪs | A | tɪł | A | tɨrnaq | A | ajaq | A |
| **Ka-Gazli 2** | bas | A | qʊlaq | A | kwøz̥ | A | burun | A | awəz̥ | A | tis | A | tɪł | A | tɨrnaq | A | ajaq | A |
| **Ka-Gazli 3** | bas | A | qʊlaq | A | køz̥ | A | mʊrʊn | A | awz̥ | A | tis | A | tił | A | tərnaq | A | ajaq | A |
| **Ka-Gazli 4** | bas | A | qʊlaq | A | køz̥ | A | mʉrʉn | A | awɨz̥ | A | tis | A | til | A | tɨrnaq | A | ajaq | A |
| **Ka-Gazli 5** | bas | A | qʊlɒq | A | kwøz | A | mʉrən | A | awuz̥ | A | tɪs | A | tɪł | A | tɨrnaq | A | ajaq | A |
| **Ka-Gazli 6** | bas | A | qʊlɒq | A | kwøz̥ | A | mʊrən | A | awəz̥ | A | tɪs | A | tɪł | A | tɨrnaq | A | ajaq | A |
| **Ka-Gazli 7** | bas | A | qʊlɒq | A | kwøz̥ | A | mʊrən | A | awz̥ | A | tɪs | A | tɪł | A | tɨrnaq | A | ajaq | A |
| **Ka-Raushan 1** | bas | A | qulaq | A | kwøz | A | mʉrɨn | A | awɨz | A | tis | A | tɪl | A | tɨrnɒq | A | ajaq | A |
| **Ka-Raushan 2** | bas | A | qulaq | A | kwøz̥ | A | mʊrʊn | A | awʊz | A | tis | A | tɪl | A | tɨrnɒq | A | ajaq | A |
| **Ka-Raushan 3** | bas | A | qulaq | A | kwøz̥ | A | mʉrʉn | A | awɨz | A | tis | A | tɪl | A | tɨrnɒq | A | ajaq | A |
| **Ka-Raushan 4** | bas | A | qulaq | A | kwøz̥ | A | mʊrʊn | A | awʊz | A | tis | A | tɪl | A | tɨrnɒq | A | ajaq | A |
| **Ki-Akmuz 1** | baʃ | A | qulaq | A | gøz̥ | A | murun | A | ɔːz̥ | A | tiʃ | A | til | A | tɨrnaq | A | but | B |
| **Ki-Akmuz 2** | baʃ | A | qulaq | A | gøz̥ | A | murun | A | ɔːz̥ | A | tiʃ | A | til | A | tɨrnaq | A | but | B |
| **Ki-Akmuz 3** | baʃ | A | qulaq | A | gøz̥ | A | murun | A | ɔːz̥ | A | tiʃ | A | til | A | tɨrnaq | A | but | B |
| **Ki-Barskoon** | baʃ | A | qulaq | A | køz̥ | A | murun | A | ɔːz̥ | A | tiʃ | A | tɪl | A | tɨrmɒq | A | but | B |
| **Ki-Kulanak 1** | baʃ | A | qulaq | A | køz̥ | A | murun | A | ɔːz̥ | A | tiʃ | A | til | A | tɨrmɒq | A | bʊt | B |
| **Ki-Kulanak 2** | baʃ | A | qulaq | A | gøz̥ | A | murun | A | ɔːz̥ | A | tiʃ | A | til | A | tɨrnaq | A | but | B |
| **Ki-Kulanak 3** | baʃ | A | qulaq | A | gøz̥ | A | murun | A | ɔːz̥ | A | tiʃ | A | til | A | tɨrmaq | A | but | B |
| **Ki-Kulanak 4** | baʃ | A | qulaq | A | gøz̥ | A | murun | A | ɔːz̥ | A | tiʃ | A | til | A | tɨrmaq | A | but | B |
| **Ki-Kulanak 5** | baʃ | A | qulaq | A | gøz̥ | A | murun | A | ɔːz̥ | A | tiʃ | A | til | A | tɨrnaq | A | but | B |
| **Ki-Orday 1** | bɒʃ | A | qulɒq | A | køs | A | burun | A | ɔːz | A | tiʃ | A | tɪl | A | tɨrnɒq | A | pʊt | B |
| **Ki-Orday 2** | bɒʃ | A | qulɒq | A | gøz | A | burun | A | ɔːz | A | tiʃ | A | tɪl | A | tɨndaq | A | pʊt | B |
| **Ki-Orday 3** | baʃ | A | qulɒq | A | gøz̥ | A | burun | A | ɔːz | A | tiʃ | A | tɪl | A | tɨndaq | A | pʊt | B |
| **Ki-Orday 4** | bɒʃ | A | qulɒq | A | køz̥ | A | murun | A | lap | B | tiʃ | A | tɪl | A | tɨrmɒq | A | but | B |
| **Ki-Tamga** | baʃ | A | qulaq | A | gøz̥ | A | murun | A | ɔːz | A | tiʃ | A | til | A | tɨrmaq | A | but | B |
| **KK-Halqabad 1** | bas | A | qulaq | A | kwøz̥ | A | mʊrʊn | A | awɨz | A | tis | A | tɪl | A | tɨrnɒq | A | ajaq | A |
| **KK-Halqabad 2** | bas | A | qulaq | A | kwøz̥ | A | mʊrʊn | A | awɨz | A | tis | A | tɪl | A | tɨrnɒq | A | ajaq | A |
| **KK-Halqabad 3** | bas | A | qulaq | A | kwøz̥ | A | mʊrʊn | A | awʊz | A | tɪs | A | tɪl | A | tɨrnɒq | A | ajaq | A |
| **KK-Kokdarya 1** | bas | A | qulaq | A | kwøz̥ | A | mʊrən | A | aɣɜz̥ | A | tɪs | A | tɪl | A | tɨrnaq | A | ajaq | A |
| **KK-Kokdarya 2** | bas | A | qulaq | A | kwøz̥ | A | mʊrən | A | awɨz̥ | A | tis | A | tɪl | A | tɨrnɒq | A | ajaq | A |
| **KK-Kokdarya 3** | bas | A | qulaq | A | kwøz | A | mʊrən | A | aɣɨz̥ | A | tis | A | tɪl | A | tɨrmɒq | A | ajaq | A |
| **KK-Kokdarya 4** | bas | A | qulɒq | A | kwøz̥ | A | mʊrʊn | A | awɨz̥ | A | tis | A | tɪl | A | tɨrnɒq | A | ajaq | A |
| **KK-Shege 1** | bas | A | qulaq | A | kwøz̥ | A | mʊrʊn | A | awɨz | A | tis | A | tɪl | A | tɨrnɒq | A | ajaq | A |
| **KK-Shege 2** | bas | A | qulaq | A | kwøz̥ | A | mʊrʊn | A | awɨz | A | tis | A | tɪl | A | tɨrnɒq | A | ajaq | A |
| **KK-Shege 3** | bas | A | qulaq | A | kwøz̥ | A | mʊrɨn | A | awɨz | A | tis | A | tɪl | A | tɨrnɒq | A | ajaq | A |
| **KK-Shege 4** | bas | A | qulaq | A | kwøz̥ | A | mʊrʊn | A | awɨz | A | tis | A | tɪl | A | tɨrnɒq | A | ajaq | A |
| **U-Hitoy 1** | baʃ | A | qulaq | A | kwøz̥ | A | mʉrʉn | A | awɨz | A | tiʃ | A | tɪl | A | tɨrnɒq | A | ajaq | A |
| **U-Hitoy 2** | baʃ | A | qulaq | A | kwøz̥ | A | mʊrən | A | awɨz | A | tiʃ | A | tɪl | A | tɨrnɒq | A | ajaq | A |
| **U-Hitoy 3** | baʃ | A | qulaq | A | kwøz̥ | A | mʊrən | A | awɨz | A | tis | A | tɪl | A | tɨrnɒq | A | ajaq | A |
| **U-Novmetan 3** | bɔʃʲ | A | qulɔq | A | kʉz̥ | A | burun | A | ɔɣəz̥ | A | tiʃ | A | til | A | tɨrnɔq | A | ajɔq | A |
| **U-Soy Mahalla 1** | bɒʃ | A | qulɒq | A | køz̥ | A | burun | A | ɔɣɨz̥ | A | tɪʃ | A | tɪl | A | tɨrnɒq | A | ajɒq | A |
| **U-Soy Mahalla 2** | bɔʃ | A | qulɒq | A | køz | A | burun | A | ɔɣɜz̥ | A | tiʃ | A | tɪl | A | tɨrnaq | A | ajaq | A |
| **U-Soy Mahalla 3** | bɔʃ | A | qulaq | A | gøz̥ | A | burun | A | ɔɣɨz̥ | A | tiʃ | A | tɪl | A | tɨrnaq | A | ajaq | A |
| **U-Urtoqqishloq 1** | bɔʃ | A | qulɒq | A | kwʉz̥ | A | burun | A | ɔɣəz̥ | A | tɪʃ | A | tɪl | A | tərnɔq | A | ɔjɒq | A |
| **U-Urtoqqishloq 2** | bɔʃ | A | qulɒq | A | kwʉz̥ | A | burun | A | ɔɣəz̥ | A | tɪʃ | A | tɪl | A | tərnɒq | A | ɔjaq | A |
| **U-Urtoqqishloq 3** | bɔʃ | A | qulɔq | A | kwʉz̥ | A | bʊrʊn | A | ɔɣəz | A | tɪʃ | A | tɪl | A | tr̩nɔq | A | ɔjaq | A |
| **U-Urtoqqishloq 4** | kalla | B | qulɒq | A | kwʉz̥ | A | bʊrʊn | A | ɔɣəz | A | tɪʃ | A | tɪl | A | tr̩̩nɔq | A | ɒjaq | A |
| **U-Zarmanak 3** | bɔʃ | A | qulɔq | A | kʉz | A | burun | A | ɔɣəz | A | tiʃ | A | til | A | nɔxun | B | ɔjɔq | A |
| **U-Zarmanak 4** | bɔʃ | A | qulɔq | A | kʉz̥ | A | burun | A | ɔɣəz̥ | A | tiʃ | A | tɨl | A | tɪrnɔq | A | ɔjɔq | A |
| **T-Agalyk** | sar | C | guʃ | B | ʧaʃm | C | bindi | D | dahɔn | C | dandɔn | B | zabɔn | B | nɔxun | B | pɔj | C |
| **T-Kamangaron 1** | sar | C | køʃ | B | ʧaʃm | C | bindi | D | dahɔn | C | dandɔ̃n | B | zuvɔn | B | nɔxun | B | pɔʧa | D |
| **T-Kamangaron 2** | kalla | B | gøʃʲ | B | ʧaʃm | C | binda | D | dahɔn | C | dandɔn | B | zavɔn | B | nɔxʊn | B | pɔj | C |
| **T-Kamangaron 3** | kalla | B | gyʃ | B | ʧaʃm̩ | C | binda | D | dahan | C | dandɔn | B | zavɔn | B | nɔxun | B | pɔ | C |
| **T-Kamangaron 4** | sar | C | gøʃ | B | ʧaʃm | C | binda | D | dahan | C | dandɔ̃n | B | zvɔ̃n | B | nɔhun | B | pɔ | C |
| **T-Kaptarhona 1** | sar | C | guʃ | B | ʧəʃm̩ | C | bənni | D | dahan | C | dandun | B | zuhun | B | nɔxun | B | poʧik | D |
| **T-Kaptarhona 2** | sar | C | guʃ | B | ʧaʃəm | C | binni | D | dahan | C | dandɔ̃n | B | zabɔn | B | nɔxun | B | pɔʧuk | D |
| **T-Kaptarhona 3** | kalla | B | guʃ | B | ʧam | C | bənnʲi | D | dahan | C | dandʊn | B | zuhun | B | noxun | B | pɔʧik | D |
| **T-Kaptarhona 4** | kalla | B | guʃ | B | ʧeʃm̩ | C | binʲi | D | dahan | C | dandʊn | B | zuhun | B | nɔxun | B | pɔʧik | D |
| **T-Kaptarhona 5** | kalla | B | guʃ | B | ʧm̩ | C | bɛnni | D | dahan | C | dandun | B | zuhun | B | nɔxun | B | pɔʧk̩ | D |
| **T-Navdî 1** | sar | C | guʃ | B | ʧaʃm | C | biniː | D | dahan | C | dandon | B | zabɔn | B | noxun | B | po | C |
| **T-Navdî 2** | sar | C | guʃ | B | ʧaʃm | C | biniː | D | dahɔn | C | dandon | B | zabɔn | B | noxun | B | pɔj | C |
| **T-Navdî 3** | sar | C | guʃ | B | ʧaʃm̩ | C | biniː | D | dahɔn | C | dandɔn | B | zabɔn | B | nɔxun | B | pɔ | C |
| **T-Nimich 1** | sar | C | guʃ | B | ʧaʃm̩ | C | biniː | D | dahɔn | C | dandɔn | B | zabɔn | B | nɔxun | B | pɔ | C |
| **T-Nimich 2** | sar | C | guʃ | B | ʧaʃm̩ | C | biniː | D | dahɔn | C | dandɔn | B | zabɔn | B | nɔxun | B | pɔj | C |
| **T-Nimich 3** | sar | C | guʃ | B | ʧm̩ | C | biniː | D | dahɔn | C | dandɔn | B | zabɔn | B | nɔxun | B | pɔ | C |
| **T-Nimich 4** | sar | C | guʃ | B | ʧm̩ | C | bəniː | D | dahan | C | dandun | B | zəhʊn | B | nɔxun | B | pɔ | C |
| **T-Novmetan 1** | sar | C | gʉʃ | B | ʧiʃ | C | bindi | D | dahan | C | dandɔ̃n | B | zubɔ̃ | B | nɔxun | B | pɔj | C |
| **T-Novmetan 2** | kalla | B | gʉʃ | B | ʧiʃ | C | bindi | D | dahan | C | dandɔ̃n | B | zubɔ̃n | B | nɔxun | B | pɔj | C |
| **T-Nûshor 1** | sar | C | guʃ | B | ʧaʃm̩ | C | biniː | D | dahɔn | C | dandɔn | B | zabɔn | B | nɔxun | B | pɔj | C |
| **T-Nûshor 2** | sar | C | guʃ | B | ʧaʃm̩ | C | biniː | D | dahɔn | C | dandɔn | B | zabɔn | B | nɔxun | B | pɔj | C |
| **T-Nûshor 3** | sar | C | guʃ | B | ʧm̩ | C | bəniː | D | dahan | C | dandʊn | B | zəhʊn | B | nɔxun | B | pɔ | C |
| **T-Rishtan 1** | sar | C | guːʃ | B | ʧaʃəm | C | binnə | D | dahan | C | dandɔ̃n | B | zabɔn | B | nɔxun | B | pɔʧik | D |
| **T-Rishtan 2** | sar | C | guʃ | B | ʧaʃəm | C | biˑni | D | dahɔn | C | dandɔn | B | zabɔn | B | nɔxʊn | B | pɔʧik | D |
| **T-Rishtan 3** | kalla | B | guʃ | B | ʧaʃm̩ | C | br̩nə | D | dahan | C | dandɔn | B | zabɔn | B | nɔxən | B | pɔʧik | D |
| **T-Shink 1** | sar | C | gʊʃ | B | ʧaʃm | C | bɪnɪː | D | dahɔn | C | dandɔ̃n | B | zabɔ̃n | B | nɔxn̩ | B | pɔj | C |
| **T-Shink 2** | sar | C | gʊʃ | B | ʧaʃm | C | bɪneː | D | dahɔn | C | dandɔ̃n | B | zabɔ̃n | B | nɔxʊn | B | pɔj | C |
| **T-Shink 3** | sar | C | gʊʃ | B | ʧaʃm | C | biniː | D | dahɔn | C | dandɔ̃n | B | zabɔ̃n | B | nɔxʊn | B | pɔj | C |
| **T-Urmetan 1** | kalla | B | gʊʃ | B | ʧaʃm | C | binni | D | dahɔn | C | dandɔ̃n | B | zabɔ̃n | B | nɔxʊn | B | pɔj | C |
| **T-Urmetan 2** | sar | C | gʊʃ | B | ʧaʃm | C | bineː | D | dahɔn | C | dandɔn | B | zabɔn | B | nɔxɔn | B | pɔj | C |
| **T-Urmetan 3** | kalla | B | gʊʃ | B | ʧaʃm | C | binni | D | dahɔn | C | dandɔ̃n | B | zabɔ̃n | B | nɔxn̩ | B | pɔ | C |
| **T-Urmetan 4** | kalla | B | gʊʃ | B | ʧaʃm | C | binniː | D | dahan | C | dandɔ̃n | B | zabɔ̃n | B | nɔxn̩ | B | pɔ | C |
| **T-Zarmanak 1** | kalla | B | gʉʃ | B | ʃiːm | C | bindi | D | dahan | C | dandɔ̃n | B | zubon | B | nɔxun | B | pɔj | C |
| **T-Zarmanak 2** | sar | C | gʉʃ | B | ʧaʃəm | C | bindi | D | dahan | C | dandɔ̃n | B | zubɔ̃n | B | nuxun | B | pɔj | C |
| **Y-Dugova 1** | sar | C | ɣuʃ | B | ɣurda | D | najs | E | rax | D | dindak | B | zivɔk | B | naxna | B | pɔda | C |
| **Y-Dugova 2** | sar | C | ɣuʃ | B | ɣurda | D | nes | E | rax | D | dindak | B | zivɔk | B | naxna | B | pɔda | C |
| **Y-Safedorak 1** | sar | C | ɣuʃ | B | ɣurda | D | nes | E | rax | D | dindak | B | ziβɔk | B | naxna | B | poda | C |
| **Y-Safedorak 2** | sar | C | ɣuʃ | B | ɣurda | D | najs | E | rax | D | dindak | B | ziβɔk | B | naxna | B | poda | C |
| **Y-Safedorak 3** | sar | C | ɣuʃ | B | ɣurda | D | najs | E | rax | D | dindak | B | zibʊk | B | naxna | B | pɔda | C |

| **Informant** | **knee** | | **hand** | | **wing** | | **belly** | | **neck** | | **back** | | **breast** | | **heart** | |
| --- | --- | --- | --- | --- | --- | --- | --- | --- | --- | --- | --- | --- | --- | --- | --- | --- |
| **Ka-Gazli 1** | tizʲe | A | qoł | A | qanat | A | qarɨn | A | mɔjɪn | A | arqa | A | jimʃik | A | ʒʉrɪk | A |
| **Ka-Gazli 2** | tizʲe | A | qoł | A | qanat | A | qarɨn | A | mɔjɪn | A | arqa | A | jimʃik | A | ʒʲʉrøk | A |
| **Ka-Gazli 3** | dzʲe | A | χoł | A | qanat | A | qarən | A | mɔjin | A | ʒawrn | B | jimʃi | A | ʒʲʉrøk | A |
| **Ka-Gazli 4** | dzʲe | A | qol | A | qanat | A | qarɨn | A | mɔjɪn | A | bʲɪl | C | kukrɨk | B | ʒʉrɪk | A |
| **Ka-Gazli 5** | dzʲe | A | qɔł | A | qanat | A | qarɨn | A | mɔjin | A | arqa | A | kʊkrɪk | B | ʒyrek | A |
| **Ka-Gazli 6** | tɪze | A | qɔł | A | qanat | A | qarɨn | A | mɔjin | A | arqa | A | køkrʲek | B | ʒʉrek | A |
| **Ka-Gazli 7** | dzʲe | A | qɔł | A | qanat | A | qarən | A | mɔjin | A | arqa | A | dʲenʲe | C | ʒʉrek | A |
| **Ka-Raushan 1** | tizʲe | A | qɔl | A | qanat | A | qarɨn | A | mɔjɪn | A | arχa | A | jɪmʃɪk | A | ʒʉrøk | A |
| **Ka-Raushan 2** | dzʲe | A | qɔl | A | qanat | A | qarɨn | A | mɔjɨn | A | arχa | A | kukrøk | B | ʒyrøk | A |
| **Ka-Raushan 3** | tɨzʲe | A | qɔl | A | qanat | A | qarɨn | A | mɔjɨn | A | arqa | A | kʊkɨrʲek | B | ʒʉrʲek | A |
| **Ka-Raushan 4** | tɨzʲe | A | qɔl | A | qanat | A | qarɨn | A | mɔjɨn | A | arqa | A | kʊkrɛk | B | ʒyrʲøk | A |
| **Ki-Akmuz 1** | tizɛ | A | qɔl | A | qanat | A | iʧʲ [[12]](#footnote-13) | B | mɔjɨn | A | bʲel | C | jɪmʧɛk | A | ʤyrøk | A |
| **Ki-Akmuz 2** | tizʲɛ | A | qɔl | A | qanat | A | iʧʲ | B | mɔjɨn | A | dɒlɨ | D | jɪmʧek | A | ʤyrøk | A |
| **Ki-Akmuz 3** | tizɛ | A | qɔl | A | qanat | A | iʧʲ | B | mɔjɨn | A | bʲel | C | jemʧɪk | A | ʤyrøk | A |
| **Ki-Barskoon** | tizʲɛ | A | qɔl | A | qanat | A | iʧʲ | B | mɔjɨn | A | dalɨ | D | ɪmʧek | A | ʤyrøk | A |
| **Ki-Kulanak 1** | tizɛ | A | qɔl | A | qanat | A | iʧʲ | B | mɔjʉn | A | arqa | A | jɛmʧek | A | ʤyrøk | A |
| **Ki-Kulanak 2** | tizʲɛ | A | qɔl | A | qanat | A | qursaq | C | mɔjɨn | A | bʲel | C | jɪmʧɪk | A | ʤyrøk | A |
| **Ki-Kulanak 3** | tizɛ | A | qɔl | A | qanat | A | iʧʲ | B | mɔjɨn | A | bʲel | C | jɪmʧek | A | ʤyrøk | A |
| **Ki-Kulanak 4** | tizɛ | A | qɔl | A | qanat | A | iʧʲ | B | mɔjɨn | A | dalɨ | D | kukrøk | B | ʤyrøk | A |
| **Ki-Kulanak 5** | tizɛ | A | qɔl | A | qanat | A | iʧʲ | B | mɔjɨn | A | dalɨ | D | jɛmʧek | A | ʤyrøk | A |
| **Ki-Orday 1** | tizɛ | A | qɔl | A | qɒnɒt | A | kursak | C | bɔjɪn | A | bʲel | C | køkrøk | B | ʒyrøk | A |
| **Ki-Orday 2** | tizɛ | A | qɔl | A | qɒnɒt | A | qɔrɨn | A | bɔjɪn | A | bʲɪl | C | køkrɛk | B | ʒyrøk | A |
| **Ki-Orday 3** | tizɛ | A | qɔl | A | qanat | A | qɔrɨn | A | bɔjɪn | A |  |  | emʧɛk | A | ʒyrøk | A |
| **Ki-Orday 4** | tizɛ | A | qɔl | A | qɒnɒt | A | aʃkazan | D | mɔjɪn | A | kyløk | E | ɛmʧek | A | ʒyrøk | A |
| **Ki-Tamga** | tizɛ | A | qɔl | A | qanat | A | iʧʲ | B | mɔjɨn | A | dalɨ | D | emʧɛk | A | ʤyrøk | A |
| **KK-Halqabad 1** | dzʲe | A | qɔl | A | qanat | A | qarɨn | A | mɔjɪn | A | arqa | A | kukrøk | B | ʒyrøk | A |
| **KK-Halqabad 2** | dzʲe | A | qɔl | A | qanat | A | asɣazan | D | mɔjɪn | A | arqa | A | jɪmʃɪk | A | ʒyrøk | A |
| **KK-Halqabad 3** | dzʲe | A | qɔl | A | qanat | A | asxazan | D | mɔjɪn | A | ʒawɔrɨn | B | jɪmʃɪk | A | ʒyrøk | A |
| **KK-Kokdarya 1** | tizʲe | A | qɔl | A | qanat | A | qarɨn | A | mɔjɨn | A | ʤawɔrən | B | jemʧɛk | A | ʤyrøk | A |
| **KK-Kokdarya 2** | tizʲe | A | qɔl | A | qanat | A | qarɨn | A | mɔjɨn | A | arqa | A | jɪmʃɛk | A | ʒʉrek | A |
| **KK-Kokdarya 3** | tizʲe | A | qɔl | A | qanat | A | qarɨn | A | mɔjɨn | A | arqa | A | kʊkrøk | B | ʒʉrøk | A |
| **KK-Kokdarya 4** | dizʲe | A | qɔl | A | qanat | A | qarɨn | A | mɔjɨn | A | arχa | A | køkrɛk | B | ʒyrøk | A |
| **KK-Shege 1** | dɪzʲe | A | qɔl | A | qanat | A | qarən | A | mɔjɪn | A | ʒawɔrən | B | jemʃɛk | A | ʒyrøk | A |
| **KK-Shege 2** | dɪzʲe | A | qɔl | A | qanat | A | qarɨn | A | mɔjɪn | A | arχa | A | kukrøk | B | ʒyrøk | A |
| **KK-Shege 3** | dɪzʲe | A | qɔl | A | qanat | A | qarɨn | A | mɔjɪn | A | arqa | A | jɪmʃɪk | A | ʒyrøk | A |
| **KK-Shege 4** | dɪzʲe | A | qɔl | A | qanat | A | qarɨn | A | mɔjɪn | A | arqa | A | kukrøk | B | ʒʉrøk | A |
| **U-Hitoy 1** | tɨzʲe | A | qɔl | A | qanat | A | qarɨn | A | mɔjɪn | A | arχa | A | jɪmʧɪk | A | ʤyrøk | A |
| **U-Hitoy 2** | dzʲe | A | qɔl | A | qanat | A | qarən | A | mɔjɪn | A | arqa | A | jɪmʧɪk | A | ʤyrøk | A |
| **U-Hitoy 3** | tɨzʲe | A | qɔl | A | qanat | A | qarən | A | mɔjɪn | A | arqa | A | jɪmʧɪk | A | ʤyrøk | A |
| **U-Novmetan 3** | buʤilak[[13]](#footnote-14) | E | qʉl | A | qanɔt | A | qɔrən | A | bʉjin | A | bʲel | C | ɛmʧak | A | jʊrak | A |
| **U-Soy Mahalla 1** | tɪzza | A | qɔl | A | qɒnɔt | A | qɔrən | A | bujin | A | bʲel | C | emʧak | A | jyrak | A |
| **U-Soy Mahalla 2** | tizza | A | qɔl | A | qɒnɔt | A | qɔrən | A | bujin | A | bʲel | C | ɛmʧæk | A | jyræk | A |
| **U-Soy Mahalla 3** | tɨzzɐ | A | qɔl | A |  |  | qɔrən | A | bʊjin | A | bʲel | C | kʉkræk | B | jyrak | A |
| **U-Urtoqqishloq 1** | tɨzzɐ | A | kwʊł | A | qanɔt | A | qɔrən | A | bʊjin | A | bʲel | C | kʉkrak | B | jʉrak | A |
| **U-Urtoqqishloq 2** | tissak | A | kwoł | A | qanɔt | A | qɔrɨn | A | bʊjin | A | bʲel | C | kʊkrak | B | jyrak | A |
| **U-Urtoqqishloq 3** | tizzɐ | A | kʊł | A | qanɔt | A | qɔrɪn | A | bʊjin | A | bʲɪl | C | kʊkrak | B | jʉrak | A |
| **U-Urtoqqishloq 4** | tizza | A | kʉł | A | qanɒt | A | qɔrɨn | A | bʊjin | A | bʲel | C | kʊkrak | B | jʉrak | A |
| **U-Zarmanak 3** |  |  | qʉl | A | qanɔt | A | qɔrɨn | A | bʉjin | A | bʲɛl | C | imʧak | A | jurak | A |
| **U-Zarmanak 4** | tɪzza | A | qʉl | A | qanɔt | A | qɔrən | A | bujin | A | ɔrqa | A | kʉkrak | B | jʊrak | A |
| **T-Agalyk** | zɔnu | D | dast | B | qanɔt | A | iʃkam | E | gardɔn | C | puʃt | G | siːna | G | dil | B |
| **T-Kamangaron 1** | tizza | A | dast | B | qanɔt | A | ʃkam | E | gardan | C | taxtapyst | H | køkrak | B | dil | B |
| **T-Kamangaron 2** | zɔnʊ | D | dast | B | qanɔq | A | iʃkam | E | gardan | C | mijɔn | I | kukraq | B | dil | B |
| **T-Kamangaron 3** | tizza | A | dast | B |  |  | iʃkam | E | gardan | C |  |  | køkraq | B | dil | B |
| **T-Kamangaron 4** | zɔna | D | dast | B | qanat | A |  |  |  |  | taxtapuʃt | H | sina | G | dil | B |
| **T-Kaptarhona 1** | zɔni | D | dest | B | qanɔt | A | ʃkam | E | gardan | C | mijun | I | qʊqrak | B | dil | B |
| **T-Kaptarhona 2** | zɔni | D | dast | B | kanɔt | A | ʃkam | E | gardɔn | C | mijun | I | sina | G | qal | C |
| **T-Kaptarhona 3** | zoni | D | døst | B | qanɔt | A | ʃkam | E | gardan | C | mijɔn | I | kukrak | B | dil | B |
| **T-Kaptarhona 4** | zoni | D | dast | B | qanɔt | A | ʃkam | E | gardan | C | mijɔn | I | quqrak | B | d̥il | B |
| **T-Kaptarhona 5** | zoni | D | dɛst | B | qanɔt | A | ʃkam | E | gardan | C | mijun | I | sina | G | dil | B |
| **T-Navdî 1** | zɔnu | D | dast | B | taf | C | ʃɪkam | E | gardan | C | mijun | I | sina | G | dil | B |
| **T-Navdî 2** | zɔnu | D | dast | B | taf | C | ʃɪkam | E | gardan | C | puʃt | G | sina | G | dil | B |
| **T-Navdî 3** | zɔnu | D | dast | B | taf | C | ʃikam | E | gardan | C | mijʊn | I | sina | G | dil | B |
| **T-Nimich 1** | zɔnʊ | D | dast | B | taf | C | ʃikam | E | gardan | C | puʃt | G | sina | G | dil | B |
| **T-Nimich 2** | zɔnʊ | D | dast | B | par | E | ʃikam | E | gardan | C | puʃt | G | sina | G | dil | B |
| **T-Nimich 3** | zɔnʊ | D | dast | B | par | E | ʃkam | E | gardan | C | puʃt | G | sina | G | dl̩ | B |
| **T-Nimich 4** | zɔnɪ | D | dəst | B | par | E | ʃkam | E | gardan | C | pəʃt | G | sina | G | dl̩ | B |
| **T-Novmetan 1** | buʤulak | E | dast | B | dast | F | iʃkam | E | gardan | C | mijɔn | I | siˑna | G | dil | B |
| **T-Novmetan 2** | zɔnʊ | D | dast | B | qanat | A | iʃkam | E | gardan | C | puʃt | G |  |  | dil | B |
| **T-Nûshor 1** | zɔʔnʊ | D | dast | B | bɔł | D | iʃkam | E | gardan | C | puʃt | G | sina | G | dil | B |
| **T-Nûshor 2** | zɔˑnʊ | D | dast | B | taf | C | ʃikam | E | gardan | C | puʃt | G | sina | G | dil | B |
| **T-Nûshor 3** | zɔnu | D | dəst | B | taf | C | ʃkam | E | gardan | C | mijʊn | I | sina | G | dl̩ | B |
| **T-Rishtan 1** | zɔnʊ | D | dast | B | qanɔt | A | iʃkam | E |  |  | mijɔn | I | siːna | G | dil | B |
| **T-Rishtan 2** | zɔnʊ | D | dast | B | qanɔt | A | iʃkam | E | gardan | C | mijɔn | I | kukrak | B | dɪl | B |
| **T-Rishtan 3** | zɔnə | D | dast | B | qanɔt | A | iʃkam | E | gardan | C | taxtapyʃt | H | sina | G | dɪl | B |
| **T-Shink 1** | zɔːnə | D | dast | B | qanɔt | A | iʃkam | E | gardan | C | pɪʃt | G | sina | G | dil | B |
| **T-Shink 2** | zɔnɪ | D | dast | B | qanɔt | A | iʃkam | E | gardan | C | pʉʃt | G | sina | G | dil | B |
| **T-Shink 3** | zɔːnə | D | dast | B | qanɒt | A | ʃkam | E | gardan | C | pʉʃt | G | siːna | G | dil | B |
| **T-Urmetan 1** | zɔːnə | D | dast | B | qanɔt | A | iʃkam | E | gardan | C | taxtapuʃt | H | siːna | G | dil | B |
| **T-Urmetan 2** | kaleno | F | dast | B | qanɔt | A | ʃkam | E | gardan | C | mijɔn | I | siːna | G | dil | B |
| **T-Urmetan 3** | zɔny | D | dast | B | qanɔt | A | ʃkam | E | gardan | C |  |  | siːna | G | dil | B |
| **T-Urmetan 4** | zʊna | D | dast | B | qanɔt | A | iʃkam | E | gardan | C |  |  | siːna | G | dil | B |
| **T-Zarmanak 1** | zɔnʊ | D | dast | B | qanat | A | iʃkam | E | gardan | C | puʃt | G | kʉkrak | B | dil | B |
| **T-Zarmanak 2** | buʤulak | E | dast | B | qanat | A | iʃkam | E | gardan | C | taxtapyʃt | H |  |  | dil | B |
| **Y-Dugova 1** | zunk | D | dast | B | qanat | A | dara | F | kama | D | arqa | A | siːna | G | dɪl | B |
| **Y-Dugova 2** | zunk | D | dast | B | qanat | A | dara | F | kama | D | arqa | A | siːna | G | dɪl | B |
| **Y-Safedorak 1** | zunk | D | dast | B | bɔl | D | dara | F | kama | D | arχa | A | siːna | G | dil | B |
| **Y-Safedorak 2** | zunk | D | dast | B | bɔl | D | dara | F | kama | D | arqa | A | siːna | G | dɪl | B |
| **Y-Safedorak 3** | zunk | D | dast | B | bal | D | dara | F | kama | D | arqa | A | siːna | G | dɪl | B |

| **Informant** | **liver** | | **to drink** | | **to eat** | | **to bite** | | **to suck** | | **to spit** | | **to blow** | | **to breathe** | |
| --- | --- | --- | --- | --- | --- | --- | --- | --- | --- | --- | --- | --- | --- | --- | --- | --- |
| **Ka-Gazli 1** | bɒwər | A | iʃʲu | A | ʒʲɪw | A | təstʲɪw | A | sɔrʊ | A | tkəru | A | ʉrlʲəw | D | dʲɪm | A |
| **Ka-Gazli 2** | bawr | A | iʃ | A | ʒʲɪw | A | ʃajna | B | ʒʉt | B | tʉkʉr | A | ʉrlʲɪw | D | dʲɪm | A |
| **Ka-Gazli 3** | bawr | A | iʃu | A | tamaxtanu | C | tɪstʲew | A | jemu | C | tkʊrʊ | A | ʉrlʲew | D | dim | A |
| **Ka-Gazli 4** | bawr | A | su | A | ʒʲew | A | tɪstʲju | A | soru | A | tʉkəru | A | ʉrlʲju | D | dʲem | A |
| **Ka-Gazli 5** | bawər | A | ɪsu | A | ʒɪʊ | A | tɪstʲew | A | soru | A | tkʊrʊ | A | ʉrlʲew | D | dʲɪm | A |
| **Ka-Gazli 6** | bawər | A | iʃu | A | ʒɪʊ | A | ʃajnaw | B | sɔru | A | tkʊrʊ | A | ʉrlʲew | D | dɪm | A |
| **Ka-Gazli 7** | bawər | A | iʃu | A | ʒɪu | A | tɪstʲew | A | sɔru | A | tkʊrʊ | A | ʉrlʲew | D | dɪm | A |
| **Ka-Raushan 1** | bawɨr | A | iʃʊ | A | ʒɪʊ | A | ʃajnaʊ | B | sɔrʊː | A | tʉpʉrʊː | A | ʉrljəʊ | D | dʲɪm | A |
| **Ka-Raushan 2** | bawɨr | A | iʃem | A | ʒim | A | stim | A | sɔrɔm | A | tʉpyrʊː | A | ʉpljem | B | dʲɪm | A |
| **Ka-Raushan 3** | bawɨr | A | iʃʊː | A | ʒɪʊ | A | tɨsteʊ | A | sɔrʊː | A | tøkørʊː | A | yrljʊ | D | dʲɪm | A |
| **Ka-Raushan 4** | bawʊr | A | iʃʊː | A | ʒɪʊ | A | tɪsteʊ | A | sɔrʊː | A | tkʊrʊː | A | ʉplʲeʊ | B | dʲɪm | A |
| **Ki-Akmuz 1** | bɔːr | A | iʧ | A | ʤʲeː | A | tiʃtøː | A | sɔrʊː | A | tykyryː | A | yjløː | D | dem | A |
| **Ki-Akmuz 2** | bɔːr | A | iʧ | A | ʤɛ | A | tiʃtøː | A | sɔrʊː | A | tykyryː | A | yjløː | D | dʲem | A |
| **Ki-Akmuz 3** | bɔːr | A | iʧ | A | ʤɛ | A | tiʃtøː | A | sɔrʊː | A | tykyryː | A | yjløː | D | dem | A |
| **Ki-Barskoon** | bɔːr | A | iʧyː | A | ʤɛ | A | tiʃtøː | A | sɔrʊː | A | tʉkʉyryː | A | yjløː | D | dem | A |
| **Ki-Kulanak 1** | bɔːr | A | iʧyː | A | ʤʲɛ | A | tiʃtøː | A | sɔrʊː | A | tykyryː | A | yjløː | D | dem | A |
| **Ki-Kulanak 2** | bɔːr | A | iʧyː | A | tamaqtanʊ | C | tiʃtøː | A | sɔrʊː | A | tykyryː | A | yjløː | D | dem | A |
| **Ki-Kulanak 3** | bɔːr | A | iʧ | A | ʤʲe | A | tiʃtøː | A | sɔrʊː | A | tykyryː | A | yjløː | D | dem | A |
| **Ki-Kulanak 4** | bɔːr | A | iʧyː | A | ʤʲe | A | tiʃtøː | A | sɔrʊː | A | tykyryː | A | yjløː | D | dem | A |
| **Ki-Kulanak 5** | bɔːr | A | iʧyː | A | ʤʲøː | A | tiʃtøː | A | sɔrʊː | A | tykyryː | A | yjløː | D | dʲɪm | A |
| **Ki-Orday 1** | bɔːr | A | iʧiʃ | A | tamaqtanɪʃ | C | tiʃtiʃ | A | emiʃ | C | typyryʃ | A | pyløʃ | H | nafas | B |
| **Ki-Orday 2** | bøjrɛ | A | iʧɛm | A | tamaqtanam | C | tiʃtɛt | A | sʊrɔn | A | typyrən | A | pydɛm | H | nafas | B |
| **Ki-Orday 3** | ʤigar | B | iʧ | A | tamaqtan | C | ʧaɣat | C | sʊr | A | tykyrət | A |  |  | nafas | B |
| **Ki-Orday 4** | bɔːr | A | iʧ | A | ʤe | A | tistʲe | A | ʃimɪʃ | C | typørɪʃ | A |  |  | dɛm | A |
| **Ki-Tamga** | bɔːr | A | iʧ | A | ʤɛ | A | tiʃtɛ | A | sɔr | A | tʉkyr | A | yjløː | D | dem | A |
| **KK-Halqabad 1** | bawʊr | A | iʃʊ | A | ʒɪʊː | A | tɪsleʊ | A | sɔrʊː | A | tɨpɨrʊ | A | yfləʊ | B | dʲɪm | A |
| **KK-Halqabad 2** | bawʊr | A | iʃʊ | A | ʒɪʊː | A | tɪstʲeʊ | A | sɔrʊː | A | tkʊrʊ | A | yfləʊ | B | dʲɪm | A |
| **KK-Halqabad 3** | bawʊr | A | iʃʊ | A | ʒɪʊː | A | tɪstʲeʊ | A | sɔrʊː | A | tpʊrʊ | A | yfləʊ | B | dʲɪm | A |
| **KK-Kokdarya 1** | bawər | A | iʃjeʊ | A | ʤiʊ | A | tistʲeʊ | A | sorʊː | A | tykʉrʊː | A | ʉfleʊ | B | dɪm | A |
| **KK-Kokdarya 2** | bawər | A | iʃjeʊ | A | ʒʲeʊ | A | asaʊ | D | sɔrʊː | A | tʉkʉrʊː | A | ʉplʲeʊ | B | dɪm | A |
| **KK-Kokdarya 3** | ʤigar | B | iʃjeʊ | A | ʤiʊ | A | tislʲeʊ | A | sɔrʊː | A | tʉpʉrʊː | A | ʉplʲʊ | B | dɪm | A |
| **KK-Kokdarya 4** | bawɨr | A | iʃjeʊ | A | ʒjiʊ | A | tɨʃlʲeʊ | A | sɔrʊː | A | tʉpʉrʊː | A | ʉpljeʊ | B | dʲɪm | A |
| **KK-Shege 1** | bawɜr | A | iʃʊ | A | ʒɪʊ | A | tɪslʲeʊ | A | sɔrʊː | A | təpʉrʊ | A | ʉflʲeʊ | B | dʲɪm | A |
| **KK-Shege 2** | bawr | A | iʃʲʊ | A | ʒɪʊː | A | tɪsteʊ | A | sɔrʊː | A | tprʊ | A | ʉfleʊ | B | dʲɪm | A |
| **KK-Shege 3** | bawɜr | A | iʃʊ | A | ʒɪʊː | A | tɨsleʊ | A | sɔrʊː | A | tɨprʊ | A | yfləʊ | B | dʲɪm | A |
| **KK-Shege 4** | bawʊr | A | iʃʊ | A | ʒɪʊː | A | tɪsleʊ | A | sɔrʊː | A | tɨkʊrʊ | A | yfləʊ | B | dʲɪm | A |
| **U-Hitoy 1** | bawʊr | A | iʧʊː | A | ʤɪʊ | A | tɪʃleʊ | A | sɔrʊː | A | təpʉrʊ | A | ʉfləʊ | B | dʲɪm | A |
| **U-Hitoy 2** | bawr̯ | A | iʧʊː | A | ʤɪʊ | A | tɪʃleʊ | A | sɔrʊː | A | tʉpʉrʊ | A | ʉfləʊ | B | dʲɪm | A |
| **U-Hitoy 3** | bawɨr | A | iʃʊ | A | ʒɪʊ | A | tɪsleʊ | A | sɔrʊː | A | tʉpʉrʊ | A | ʉfləʊ | B | dʲɪm | A |
| **U-Novmetan 3** | ʤigar | B | iʧiʃ | A | jejiʃ | A | tʃlaʃ | A | sʉriʃ | A | tupəriʃ | A |  |  | nafas | B |
| **U-Soy Mahalla 1** | ʤigar | B | iʧiʃ | A | jejiʃ | A | tiʃla | A | sʊriʃ | A | tʊpʊrə | A | pʊfla | G | nafas | B |
| **U-Soy Mahalla 2** | ʤigar | B | iʧmɔq | A | jemɔq | A | tiʃlamɔq | A | sʊrmɔq | A | typyrmɔq | A | pʉjdamɔq | H | nafas | B |
| **U-Soy Mahalla 3** | ʤigar | B | iʧiʃ | A | jejiʃ | A | tiʃlaʃ | A | sɔrɪʃ | A | tʉpʉrɪʃ | A | pʉjdaʃ | H | nafas | B |
| **U-Urtoqqishloq 1** | ʤigar | B | iʧiʃ | A | jemɔq | A | tɪʃlaʃ | A | sʉrmɔq | A | tʉpʉrmɔq | A | pf̩laʃ | G | nafas | B |
| **U-Urtoqqishloq 2** | ʤigar | B | iʧmɔq | A | jɪmɔq | A | tɪʃlamɔq | A | sʉrmɔq | A | tʉfʉrmɔq | A | pf̩lamɔq | G | nafas | B |
| **U-Urtoqqishloq 3** | ʤigar | B | iʧiʃ | A | jɪiʃ | A | tɪʃlamɔq | A | sʊrmɔq | A | tpr̩mɔq | A | pf̩laʃ | G | nafas | B |
| **U-Urtoqqishloq 4** | ʤigar | B | iʧmɔq | A | jɪmɔq | A | tɪʃlamɔq | A | sʉrmɔq | A | tpr̩mɔq | A | pf̩lamɔq | G | nafas | B |
| **U-Zarmanak 3** | ʤigar | B | iʧiʃ | A | jejiʃ | A | tiʃlaʃ | A |  |  | tuflaʃ | B | puflaʃ | G | nafas | B |
| **U-Zarmanak 4** | ʤigar | B | iʧmɔq | A | jemɔq | A | tʃlamɔq | A | sʉrmɔq | A | tupurmɔq | A | pflamɔq | G | nafas | B |
| **T-Agalyk** | ʤigar | B | nuʃidan | B | xurdan | E | gazidan | F | makidan | D | tuf | B | puf | G | nafas | B |
| **T-Kamangaron 1** | ʤigar | B | nøstan | B | xørdan | E | gazidan | F | markidan | D |  |  | puf | G | nafas | B |
| **T-Kamangaron 2** | ʤigar | B | kørdan | C | kørdan | E | gazdan | F | makidan | D | tuf | B | puf | G | nafas | B |
| **T-Kamangaron 3** | ʤigar | B | nøʃtan | B | guʃnagi | F | gazdan | F | makkian | D | tuf | B |  |  | nafas | B |
| **T-Kamangaron 4** | ʤʲigar | B | nøstan | B | xørdan | E | xojdan | G | makidan | D | tuf | B | huf | F | nafas | B |
| **T-Kaptarhona 1** | ʤigar | B | nuʃidan | B | xurdan | E | gazidan | F | makidan | D | tuf | B | puf | G | nafas | B |
| **T-Kaptarhona 2** | ʤigar | B | nuʃit | B | xurdan | E | gazidan | F | makidan | D | tuf | B | puf | G | nafas | B |
| **T-Kaptarhona 3** | ʤigar | B | nuʃit | B | mixran[[14]](#footnote-15) | G | megazan | F | mimakan | D | tuf | B |  |  | nafas | B |
| **T-Kaptarhona 4** | ʤigar | B | nuʃidan | B | xʊrdan | E | gazidan | F | makidan | D | tuf | B | puf | G | naf | B |
| **T-Kaptarhona 5** | ʤigar | B | xurdan | C | xurdan | E | gazidan | F | makidan | D | tuf | B | puf | G | nafas | B |
| **T-Navdî 1** | ʤigar | B | nuʃidan | B | xʊrdan | E | gazidan | F | makidan | D | tuf | B | puf | G | nafas | B |
| **T-Navdî 2** | ʤigar | B | nuʃidan | B | xurdan | E | gazidan | F | makidan | D | tf | B | puf | G | nafas | B |
| **T-Navdî 3** | ʤigar | B | nʉʃidan | B | xʊrdan | E | gazidan | F |  |  | tʊf | B | pʊf | G | nafas | B |
| **T-Nimich 1** | ʤigar | B | nuʃidan | B | xurdan | E | gazidan | F | makidan | D | tuf | B | puf | G | nafas | B |
| **T-Nimich 2** | ʤigar | B | nuʃidan | B | xurdan | E | gazidan | F | makidan | D | tuf | B | puf | G | nafas | B |
| **T-Nimich 3** | ʤigar | B | nuʃidan | B | xurdan | E | gazidan | F | makidan | D | tuf | B | puf | G | nafas | B |
| **T-Nimich 4** | ʤigar | B | nuʃidan | B | xurdan | E | gazidan | F | makidan | D | tuf | B | puf | G | nafas | B |
| **T-Novmetan 1** | ʤigar | B |  |  | xʉr[[15]](#footnote-16) | E | gaz̥ | F | mak | D | tuf | B | puf | G | nafas | B |
| **T-Novmetan 2** | ʤigar | B | xʉrdan[[16]](#footnote-17) | C | xʉrdan | E | gæzidan | F | makidan | D | tuf | B | puf | G | nafas | B |
| **T-Nûshor 1** | ʤigar | B | nuʃidan | B | xurdan | E | gazidan | F | makidan | D | tuf | B | dut | E | nafas | B |
| **T-Nûshor 2** |  |  | ɔbburdan | D | xurdan | E | gazidan | F | makidan | D | tuf | B | havo | F | nafas | B |
| **T-Nûshor 3** | ʤigar | B | xurdan | C | xurdan | E | gazidan | F | makidan | D | tf̩ | B | puf | G | nafas | B |
| **T-Rishtan 1** | ʤigar | B | nuʃidan | B | xurdan | E | gazidan | F | makidan | D | tuf | B | puf | G | nafas | B |
| **T-Rishtan 2** | ʤigar | B | nuʃidan | B | xurdan | E | gazidan | F | makidan | D | tuf | B | puf | G | nafas | B |
| **T-Rishtan 3** | ʤigar | B | nuʃidan | B | xʊrdan | E | gazidan | F | makɪdan | D | tuf | B | pf̩ | G | nafas | B |
| **T-Shink 1** | ʤigar | B | nʊʃidan | B | xʊrdan | E | gazɪ | F | makidan | D | tf̩ | B | pf̩ | G | nafas | B |
| **T-Shink 2** | ʤigar | B | nuʃidan | B | xʉrdan | E | gazidan | F | makidan | D | tf̩ | B | pf̩ | G | nafas | B |
| **T-Shink 3** | ʤigar | B | nʊʃidan | B | xʊrdan | E | gazidan | F | makidan | D | tf̩ | B | pf̩ | G | nafas | B |
| **T-Urmetan 1** | ʤigar | B | nuʃidan | B | xurdan | E | gazidan | F | makidan | D | tuf | B | puf | G | nafas | B |
| **T-Urmetan 2** | ʤigar | B | nuʃidan | B | xʊrdan | E | gazidan | F | makidan | D | tf̩ | B | pʊf | G | nafas | B |
| **T-Urmetan 3** | ʤigar | B | nuʃidan | B | xʊrdan | E | gazidan | F | makidan | D | tf̩ | B | pf̩ | G | nafas | B |
| **T-Urmetan 4** | ʤigar | B | nuʃidan | B | xʊrdan | E | gazidan | F | makidan | D | tf̩ | B | puf | G | nafas | B |
| **T-Zarmanak 1** | ʤigar | B | nʉʃidan | B | xʉrdan | E | gazdan | F | makidan | D | təf | B | pəf | G | nafas | B |
| **T-Zarmanak 2** | ʤigar | B | nʉʃtan | B | xʉrdan | E | gazdan | F | makidan | D | tuf | B | pf | G | nafas | B |
| **Y-Dugova 1** | ʤigar | B | ʒaβak | E | xwarak | E | xɪʃojak | H | zʊmakak | D | tuf | B | haβɔ | F | nafas | B |
| **Y-Dugova 2** | ʤigar | B | ʒaβ | E | xwar | E | xɪʃoj | H | zamakak | D | tuf | B | puf | G | nafas | B |
| **Y-Safedorak 1** | ʤigar | B | ʒaβak | E | xwarak | E | xɪʃojak | H | zʊmakak | D | tufi | B | pufi | G | nafas | B |
| **Y-Safedorak 2** | ʤigar | B | ʒaβak | E | xwarak | E | xɪʃojak | H | zɪmakak | D | tuf | B | puf | G | nafas | B |
| **Y-Safedorak 3** | ʤigar | B | ʒaβak | E | xwarak | E | xɪʃojak | H | zɪmakak | D | tufi | B | puf | G | nafas | B |

| **Informant** | **to laugh** | | **to see** | | **to hear** | | **to know** | | **to think** | | **to smell** | | **to fear** | |
| --- | --- | --- | --- | --- | --- | --- | --- | --- | --- | --- | --- | --- | --- | --- |
| **Ka-Gazli 1** | kʉlu | A | køru | A | jestu | A | blʊ | A | ɔjlaw | A | iskʲɪw | A | qɔrqʊw | A |
| **Ka-Gazli 2** | kʉl | A | kwør | A | jest | A | bɪl | A | ɔjla | A | iskʲe | A | qɔrqaq | A |
| **Ka-Gazli 3** | kʊlu | A | kwørʊ | A | tændaw | B | bɪlu | A | ɔjlaw | A | iskʲew | A | qorχu | A |
| **Ka-Gazli 4** | kʉlu | A | kørʊ | A | jestu | A | bəlu | A | ɔjlaw | A | iskʲju | A | qorqu | A |
| **Ka-Gazli 5** | kʊlu | A | køru | A | jestu | A | bəlʲu | A | ɔjlaw | A | iskʲew | A | qɔrqʊ | A |
| **Ka-Gazli 6** | kʉlu | A | køru | A | jesɪtu | A | bɪlu | A | ɔjlaw | A | iskʲew | A | qɔrqʊ | A |
| **Ka-Gazli 7** | kʉlkə | A | køru | A | jestu | A | bɪlu | A | ɔjlanʊ | A | ɨskʲew | A | qɔrqʊ | A |
| **Ka-Raushan 1** | kʉlʊː | A | kørʊː | A | jestʊː | A | bɨlʊː | A | ojlaʊ | A | iskʲelʊː | A | qɔrqʊ | A |
| **Ka-Raushan 2** | kylʊː | A | kørʊː | A | jɪstʊː | A | bəlʊː | A | wɔjlɔː | A | iskʲelɪm | A | qɔrqʊ | A |
| **Ka-Raushan 3** | kʉlʊː | A | kørʊː | A | jestʊː | A | bɨlʊ | A | wɔjlɔː | A | iskʲeʊ | A | qɔrqʊː | A |
| **Ka-Raushan 4** | kʉlʊː | A | kørʊː | A | jeʃtʊː | A | bɨlʊ | A | wɔjlaʊ | A | iskʲelʊ | A | qɔrqʊː | A |
| **Ki-Akmuz 1** | gyløː | A | gøryː | A | uɣuː | C | bilyː | A | ɔjloː | A | ʤittɔː | B | qɔrqʊː | A |
| **Ki-Akmuz 2** | kyløː | A | køryː | A | uɣuː | C | bilyː | A | ɔjlanʊː | A | ʤɨttɔː | B | qɔrqʊː | A |
| **Ki-Akmuz 3** | kyløː | A | gøryː | A | uɣuː | C | bilyː | A | ɔjlanʊː | A | ʤɨttɔː | B | qɔrqʊː | A |
| **Ki-Barskoon** | kʉløː | A | gøryː | A | uɣuː | C | bilʉː | A | ɔjloː | A | ʤɨttɔː | B | qɔrqʊː | A |
| **Ki-Kulanak 1** | kyløː | A | køryː | A | uɣuː | C | bilyː | A | ɔjlɔnʊː | A | ʤɨttɔː | B | qɔrqʊː | A |
| **Ki-Kulanak 2** | gyløː | A | gøryː | A | uɣuː | C | bilyː | A | ɔjloː | A | ʤɨttɔː | B | qɔrqʊː | A |
| **Ki-Kulanak 3** | gyløː | A | gøryː | A | uɣuː | C | bilyː | A | ɔjloː | A | ʤɪtta | B | qɔrqʊː | A |
| **Ki-Kulanak 4** | gyløː | A | køryː | A | uɣuː | C | bilyː | A | ɔjloː | A | ʤittɔː | B | qɔrqʊː | A |
| **Ki-Kulanak 5** | gyløː | A | gøryː | A | uɣuː | C | bilyː | A | ɔjloː | A | ʤɨttɔː | B | qɔrqʊː | A |
| **Ki-Orday 1** | gylyʃ | A | køryʃ | A | jestiʃ | A | biliʃ | A | ɔjlaʃ | A | jittaʃ | B | qɔrqʊʃ | A |
| **Ki-Orday 2** | gyləm | A | gørəm | A | uɣam | C | bilɛm | A | ɔjlɔɪm | A | ʤittam | B | qɔrqɔm | A |
| **Ki-Orday 3** | gylət | A | gyrət | A | ɪʃtɛt | A | bilɛt | A | ɔjlɒnɔt | A | ʒittajt | B | qɔrqɔt | A |
| **Ki-Orday 4** | kylʊː | A | kyrʊː | A | uɣuː | C | bilʊː | A | ɔjloː | A | ʤɨttoː | B | qɔrqʊː | A |
| **Ki-Tamga** | kʉl | A | køryː | A | uɣuː | C | bilyː | A | ɔjlɔː | A | ʤɨtta | B | qɔrqʊː | A |
| **KK-Halqabad 1** | kʉlʊː | A | kørʊː | A | jɪstʊ | A | bɨlʊ | A | wɔjlaʊ | A | jiskʲelʊː | A | qɔrχʊː | A |
| **KK-Halqabad 2** | kʉlʊː | A | kørʊː | A | jɪstʊ | A | bɨlʊ | A | wɔjlaʊ | A | jiskʲeʊ | A | qɔrqʊː | A |
| **KK-Halqabad 3** | kʉlʊː | A | kørʊː | A | tɨŋlaʊ | B | bɨlʊ | A | wɔjlanʊ | A | jiskʲeʊ | A | qɔrqʊː | A |
| **KK-Kokdarya 1** | kʊlʊː | A | kørʊː | A | kulʊː | D | bɪleʊ | A | ʊjlanʊː | A | iskʲeʊ | A | qɔrqʊː | A |
| **KK-Kokdarya 2** | kʉlʊ | A | kørʊ | A | jɪstʊ | A | bɨlʊ | A | ɔjlɔː | A | iskʲeʊ | A | qɔrqʊː | A |
| **KK-Kokdarya 3** | kʉlʊː | A | kørʊː | A | jɪstʊː | A | bɪlʊː | A | ɔjlɔː | A | iskʲeʊ | A | qɔrqʊː | A |
| **KK-Kokdarya 4** | kʉlʊː | A | kørʊː | A | jɪstʊː | A | bɨlʊː | A | ʊjlaʊ | A | iskʲelʲeʊ | A | qɔrqʊ | A |
| **KK-Shege 1** | kʉlʊː | A | kørʊː | A | jɪʃtʊ | A | bəlʲʊ | A | wɔjlaʊ | A | iskʲeləʊ | A | qɔrχʊː | A |
| **KK-Shege 2** | kʉlʊː | A | kørʊː | A | jiːstʊ | A | bɨlʊ | A | wɔjlanʊ | A | iskʲelʲʊ | A | qɔrqʊː | A |
| **KK-Shege 3** | kʉlʊː | A | kørʊː | A | jɪstʊ | A | bɨlʲʊ | A | wɔjlanʊ | A | jiskʲelʊː | A | qɔrqʊː | A |
| **KK-Shege 4** | kʉlʊː | A | kørʊː | A | jɪstʊ | A | bɨlʊː | A | wɔjlaʊ | A | iskʲelʊː | A | qɔrχʊː | A |
| **U-Hitoy 1** | kʉlʊː | A | kørʊː | A | jɪʃtʊ | A | bəlʊ | A | wɔjlaʊ | A | iskʲeʊ | A | qɔrχʊː | A |
| **U-Hitoy 2** | kʉlʊː | A | kørʊː | A | jɪʃtʊ | A | bəlʊ | A | wɔjlanʊ | A | iskʲʊ | A | qɔrχʊː | A |
| **U-Hitoy 3** | kʉlʊː | A | kørʊː | A | jɪstʊ | A | bɨlʊ | A | wɔjlaʊ | A | iskʲʊ | A | qɔrqʊː | A |
| **U-Novmetan 3** | kuliʃ | A | kʉriʃ | A |  |  | biliʃ | A | ʉjlaʃ | A | hidlaʃ | C | qʉrqiʃ | A |
| **U-Soy Mahalla 1** | kyliʃ | A | køriʃ | A | eʃitmɔq | A | biliʃ | A | ʉjlaʃ | A | hidlamɔq | C | qʉrqmɔq | A |
| **U-Soy Mahalla 2** | kʉlmɔq | A | kʉrmɔq | A | eʃɪtmɔq | A | bɨlmɔq | A |  |  | iskjamɔq | A | qurqmɔq | A |
| **U-Soy Mahalla 3** | kʉliʃ | A | køriʃ | A | iʃtiʃ | A | biliʃ | A | ʉjlaʃ | A | hidlaʃ | C | qɔrqɪʃ | A |
| **U-Urtoqqishloq 1** | kʉliʃ | A | kʉrmɔq | A | eʃɪtiʃ | A | bɪlmɔq | A | wʉjlaʃ | A | hidlaʃ | C | qwʉrqiʃ | A |
| **U-Urtoqqishloq 2** | kʉlmɔq | A | kʉrmɔq | A | jeʃitmɔq | A | bɪlmɔq | A | ʊjlamɔq | A | iskamɔq | A | qʉrqmɔq | A |
| **U-Urtoqqishloq 3** | kʉlmɔq | A | kʉrmɔq | A | jeʃitmɔq | A | bɪliʃ | A | ʊjlamoq | A | iskʲamɔq | A | qʉrqmɔq | A |
| **U-Urtoqqishloq 4** | kʉlmɔq | A | kʉrmɔq | A | jeʃitɪʃ | A | bɪlmɔq | A | ʊjlamoq | A | hidlamɔq | C | qʉrqmɔq | A |
| **U-Zarmanak 3** | kuliʃ | A | kʉriʃ | A | eʃɪtiʃ | A | biliʃ | A | ʉjlaʃ | A | hidlaʃ | C | qʉrqiʃ | A |
| **U-Zarmanak 4** | kulmɔq | A | kʉrmɔq | A | ɪʃtmɔq | A | bilmɔq | A | ʉjlamoq | A | hidlamɔq | C | qʉrqmɔq | A |
| **T-Agalyk** | xandidan | C | didan | B | ʃønidan | H | donistan | C | fikr̩ | E | buj | E | tarsidan | B |
| **T-Kamangaron 1** | xandidan | C | didan | B | ʃynidan | H | donistan | C | fkir | E | bø | E | tarsidan | B |
| **T-Kamangaron 2** | xandidan | C | didan | B | fahmidan | G | dɔnistan | C | øjla | A | bø | E | tarsidan | B |
| **T-Kamangaron 3** |  |  | didan | B | ʃynidan | H | dɔnistan | C | øjla | A |  |  | tarsidan | B |
| **T-Kamangaron 4** | xandidan | C | didan | B | ʃunidan | H | dɔniʃtan | C | øjla | A | bø | E | tarsidan | B |
| **T-Kaptarhona 1** | xandidan | C | didan | B | ʃnavidan | H | donistan | C | uj | A | bʊ | E | tarsidan | B |
| **T-Kaptarhona 2** | xandidan | C | didan | B | ʃnavidan | H | dunistan | C | fikr | E | buj | E | tarsidan | B |
| **T-Kaptarhona 3** | mexandan | C | medinam | B | mʲeʃnarvam | H | mʲedonam | C | uj | A | bu | E | metarsam | B |
| **T-Kaptarhona 4** | xandidan | C | didan | B | ʃnavidan | H | dʊnistan | C | uj | A | bu | E | tarsidan | B |
| **T-Kaptarhona 5** | xandidan | C | didan | B | ʃnavidan | H | dunistan | C | uj | A | bu | E | tarsidan | B |
| **T-Navdî 1** | xandidan | C | didan | B | guʃ | J | dʊnistan | C | fikr | E | buj | E | tarsidan | B |
| **T-Navdî 2** | xandidan | C | didan | B | ʃənidan | H | dʊnistan | C | fikr̩ | E | buj | E | tarsidan | B |
| **T-Navdî 3** | xandidan | C | didan | B | ʃənidan | H | dʊnistan | C | fikr̩ | E | bu | E | tarsidan | B |
| **T-Nimich 1** | xandidan | C | didan | B | guʃ | J | dɔnistan | C | fikr̩ | E | buj | E | tarsidan | B |
| **T-Nimich 2** | xandidan | C |  |  | guʃ | J | fahmidan[[17]](#footnote-18) | D | figr̩ | E | buj | E | tarsidan | B |
| **T-Nimich 3** | xandidan | C | didan | B | ʃənidan | H | dɔnistan | C | figr̩ | E | bʊ | E | tarsidan | B |
| **T-Nimich 4** | xandidan | C | didan | B | ʃnavidan | H | dunistan | C | fikr̩ | E | bʊ | E | tarsidan | B |
| **T-Novmetan 1** | xanda | C | didan | B | faˑmidan | G |  |  | ʉjla | A | bʉj | E | tarsidan | B |
| **T-Novmetan 2** | xandan | C | didan | B | famidan | G | dɔnistan | C | ʉjla | A | bʉ | E | tarsidan | B |
| **T-Nûshor 1** | xandidan | C | didan | B | ʃnavidan | H | dɔnistan | C | figr̩ | E | bʉj | E | tarsidan | B |
| **T-Nûshor 2** | xandidan | C | didan | B | guʃ | J | fahmidan | D | figr̩ | E | bʉj | E | tarsidan | B |
| **T-Nûshor 3** | xandidan | C | didan | B | ʃənidan | H | dʊnistan | C | figr̩ | E | bʊ | E | tarsidan | B |
| **T-Rishtan 1** | xandidan | C | didan | B | ʃynidan | H | dɔnistan | C | uj | A | buj | E | tarsidan | B |
| **T-Rishtan 2** | xandidan | C | didan | B | guʃ | J | dɔnistan | C | uj | A | buj | E | tarsidan | B |
| **T-Rishtan 3** | xandidan | C | didan | B | ʃnawidan | H | dɔnistan | C | fkər | E | bu | E | tarsidan | B |
| **T-Shink 1** | xanda | C | didan | B | guʃ | J | dɔnistan | C | fikr | E | nafas | F | tarsidan | B |
| **T-Shink 2** | xandidan | C | didan | B | ʃənidan | H | dɔnistan | C | fikr | E | nafas | F | tarsidan | B |
| **T-Shink 3** | xandidan | C | didan | B | guʃ | J | dɔnistan | C | fikr | E | bu | E | tarsidan | B |
| **T-Urmetan 1** | xandidan | C | didan | B | guʃ | J | dɔnistan | C | ujla | A | buj | E | tarsidan | B |
| **T-Urmetan 2** | xandidan | C | didan | B | ʃənidan | H | dɔnistan | C | fikr | E | his | G | tarsidan | B |
| **T-Urmetan 3** | xandidan | C | didan | B | guʃ | J | fahmidan | D | fikr | E | buj | E | tarsidan | B |
| **T-Urmetan 4** | xandidan | C | didan | B | ʃənidan | H | fahmidan | D | ujla | A | bu | E | tarsidan | B |
| **T-Zarmanak 1** | xandan | C | didan | B | gʉʃ | J | dɔnistan | C | ʉjla | A | bʉj | E | tarsidan | B |
| **T-Zarmanak 2** | xanda | C | didan | B | famdan | G | dɔnistan | C | ʉjla | A | bʉj | E | tarsidan | B |
| **Y-Dugova 1** | xantak | C | avenim | C | ɣʊʃa | J | aɣirɪvim | E | fikri | E | bu | E | aʧukajrim | C |
| **Y-Dugova 2** | xantak | C | venak | C | duruʃak | K | ɣirifak | E | fikri | E | vudi | E | ʧikerak | C |
| **Y-Safedorak 1** | xantak | C | vʲenak | C | dʊrʊʃak | K | ɣɪrɪβak | E | fikri | E | budi | E | ʧʊkajrak | C |
| **Y-Safedorak 2** | xantak | C | vʲɪnak | C | ɣʊʃi | J | ɣɪrɪβak | E | fikr | E | budi | E | ʧukajrak | C |
| **Y-Safedorak 3** | xantak | C | venak | C | ɣʊʃi | J | ɣɪrɪβak | E | fikri | E |  |  |  |  |

| **Informant** | **to sleep** | | **to live** | | **to die** | | **to kill** | | **to fight** | | **to hunt** | | **to hit** | |
| --- | --- | --- | --- | --- | --- | --- | --- | --- | --- | --- | --- | --- | --- | --- |
| **Ka-Gazli 1** | ɪxtaw | A | wʉmərsʉrʊw | A | wʉlu | A | wʉltəru | A | kʉrɪsu | A | aŋ | A | ʊru | A |
| **Ka-Gazli 2** | ʉxtaw | A | ʒasaw | B | wʉlu | A | wʉltruː | A | kʉrɪsu | A | ʒaɣu | B | uru | A |
| **Ka-Gazli 3** | ʉqtaw | A | wʉmərsərʊ | A | wʉlu | A | wʉltrʊ | A | kʉrɪsu | A | aŋ | A | ʊru | A |
| **Ka-Gazli 4** | ʉqtaw | A | ʒasaw | B | wølu | A | wøltrʊ | A | awsu | C | aŋ | A | ʊru | A |
| **Ka-Gazli 5** | ʉxta | A | ʒasa | B | wʉlj | A | wʉltəru | A | kʉrɪsu | A | aŋ | A | uru | A |
| **Ka-Gazli 6** | ʉqtaw | A | ʒasaw | B | wʉlʊ | A | wʉltru | A | ʉrsu | C | aŋ | A | uru | A |
| **Ka-Gazli 7** | ʉqtaw | A | ʒasaw | B | wølʊ | A | wøltru | A | taʃlik | D | aŋ | A | uru | A |
| **Ka-Raushan 1** | ɨxloː | A | wømərsrʊː | A | wølʊː | A | wøltrʊː | A | kʉrøsʊː | A | aŋ | A | ʊrʊː | A |
| **Ka-Raushan 2** | ʉxtaʊ | A | ʒasaʊ | B | wølʊː | A | wøltrʊː | A | kʉrəsʊː | A | aŋ | A | ʊrʊː | A |
| **Ka-Raushan 3** | ʉxtɔʊ | A | wymərsrʊ | A | wølʊː | A | wøltrʊː | A | kʉrøsʊː | A | aŋ | A | ʊrʊː | A |
| **Ka-Raushan 4** | ʉxtaʊ | A | ʒasaʊ | B | wølʊː | A | wøltrʊː | A | kʉrøʃʊː | A | aŋ | A | ʊrʊː | A |
| **Ki-Akmuz 1** | uχtɔː | A | ʤaʃɔː | B | ølyː | A | øltɨryː | A | kyrøʃyː | A | aŋ | A | uruː | A |
| **Ki-Akmuz 2** | uqtɔː | A | ʤaʃɔː | B | ølyː | A | øltɨryː | A | kyrøʃyː | A | uɣaʧɨɣuː | C | ʧaβuː | B |
| **Ki-Akmuz 3** | uqtɔː | A | ʤaʃɔː | B | ølyː | A | øltɨryː | A | gyrøʃyː | A | aŋ | A | turat | C |
| **Ki-Barskoon** | uqtɔː | A | ʤaʃɔː | B | ølyː | A | wøltɨryː | A | kʉrøʃyː | A | aŋ | A | ʃoq | D |
| **Ki-Kulanak 1** | uqtɔː | A | ʤaʃɔː | B | ølyː | A | øltɨryː | A |  |  |  |  |  |  |
| **Ki-Kulanak 2** | uqtɔː | A | ʤaʃɔː | B | ølyː | A | øltɨryː | A | gyrøʃyː | A | aŋʧɪlɪq | A | ʧaβuː | B |
| **Ki-Kulanak 3** | uqta | A | ʤaʃa | B | ølyː | A | øltɨr | A | gyrøʃ | A | aŋ | A | ur | A |
| **Ki-Kulanak 4** | uqtɔː | A | ʤaʃɔː | B | ølyː | A | øltɨryː | A | kyrøʃyː | A | aŋ | A | uruː | A |
| **Ki-Kulanak 5** | uqtɔː | A | ʤaʃɔː | B | ølyː | A | øltɨryː | A | gyrøʃyː | A | aŋʧɪlɪq | A | ʧaβuː | B |
| **Ki-Orday 1** | ujqɔʊ | B | jaʃɔː | B |  |  | øldʉrʉʃ | A | gʉrəʃ | A | ʊɣlɨʃ | C | urɪʃ | A |
| **Ki-Orday 2** | uxtam | A | ʤaʃɛm | B | øløt | A | øltʉrəm | A | kyrøʃəm | A | ugliʃ | C | uram | A |
| **Ki-Orday 3** | uxtæt | A | ʤaʃɛt | B | ølɛt | A | øldʉrət | A |  |  |  |  | urat | A |
| **Ki-Orday 4** | uktoː | A | ʤaʃɔː | B | ølyː | A | øltʉrʊː | A | kyrøsʊː | A | ʊːlɔː | D | ʊrʊː | A |
| **Ki-Tamga** | uχta | A | ʤaʃɔː | B | ølyː | A | øltɨr | A | kyrøʃ | A | aŋ | A | sɔq | D |
| **KK-Halqabad 1** | ɨxlaʊ | A | ʒasaʊ | B | wølʊː | A | wøltrʊː | A | gʊrøsʊ | A | aŋ | A | ʊrʊː | A |
| **KK-Halqabad 2** | ɨxlaʊ | A | ʒasaʊ | B | wølʊː | A | wøltrʊː | A | gʊrøsʊ | A | aŋ | A | ʊrʊː | A |
| **KK-Halqabad 3** | ɨxlaʊ | A | ʒasaʊ | B | wølʊː | A | wøltrʊː | A | gʊrøʃʊ | A | aŋ | A | ʊrʊː | A |
| **KK-Kokdarya 1** | ʊxlaʊ | A | ʒasaʊ | B | wølən | A | wøltərʊː | A | kʉrøsʊː | A | aŋ | A | ʊrʊː | A |
| **KK-Kokdarya 2** | ɨxlaʊ | A | ʒasaʊ | B | wøjlɔː | A | wøltərʊː | A | kʉrøsʊː | A | aŋ | A | ʊrʊː | A |
| **KK-Kokdarya 3** | ɨxlaʊ | A | ʤasaʊ | B | wulʊ | A | wɔltərʊː | A | kʉrəsʊː | A | aβlaʃ | E | ʊrʊː | A |
| **KK-Kokdarya 4** | ɨxlaʊ | A | ʒasaʊ | B | wøjlʊː | A | wøltrʊː | A | gʉresʊː | A | aŋ | A | ʊrʊː | A |
| **KK-Shege 1** | ɨxlaʊ | A | ʤasaʊ | B | wølʊː | A | wøltrʊː | A | gʊrəʃʊ | A | aŋ | A | ʊrʊː | A |
| **KK-Shege 2** | ɨxlaʊ | A | ʒasaʊ | B | wølʊː | A | wøltrʊː | A | kʊrɨsʊ | A | aŋ | A | ʊrʊː | A |
| **KK-Shege 3** | ɨxlaʊ | A | ʒasaʊ | B | wølʊː | A | wøltrʊː | A | kʊrɨsʊ | A | aŋ | A | ʊrʊː | A |
| **KK-Shege 4** | ɨxlaʊ | A | ʒasaʊ | B | qajt | C | wøltrʊː | A | kʊrɪsʊ | A | aŋ | A | ʊrʊː | A |
| **U-Hitoy 1** | uxlaʊ | A | jaʃaʊ | B | wølʊː | A | wøltrʊː | A | kʊrasʊː | A | ɔq | E | ʊrʊː | A |
| **U-Hitoy 2** | ʉxlaʊ | A | ʤaʃaʊ | B | wølʊː | A | wøltrʊː | A | gʉreʃʊ | A | aŋ | A | ʊrʊː | A |
| **U-Hitoy 3** | ɨxlaʊ | A | ʤaʃaʊ | B | wølʊː | A | wøltərʊː | A | kʉrʲesʊ | A | aŋ | A | ʊrʊː | A |
| **U-Novmetan 3** | uxlaʃ | A | jaʃaʃ | B | ʉliʃ | A | ʉldriʃ | A | kuraʃ | A | ɔβlaʃ | E | uriʃ | A |
| **U-Soy Mahalla 1** | uxlaʃ | A | jaʃamɔq | B | ʉlmɔq | A | ʉldɨrmɔq | A | kʊraʃmɔq | A | ɔβlaʃ | E | uriʃ | A |
| **U-Soy Mahalla 2** | uxlamɔq | A | jaʃamɔq | B | ʉlmɔq | A | ʉldɨrmɔq | A | kʉraʃmɔq | A | ɔβlamɔq | E | urmɔq | A |
| **U-Soy Mahalla 3** | uxlaʃ | A | jaʃaʃ | B | øliʃ | A | ʉldɨrɪʃ | A | kʉraʃɪʃ | A | ɔβlaʃ | E | uriʃ | A |
| **U-Urtoqqishloq 1** | ujxʉ | B | jaʃamɔq | B | wʉlɪʃ | A | wʉldəriʃ | A | kuraʃmɔq | A | ow | E | urmɔq | A |
| **U-Urtoqqishloq 2** | uxlamɔq | A | jaʃaʃ | B | wʉlmɔq | A | wʉldɪrmɔq | A | kuraʃmɔq | A | owlamɔq | E | urmɔq | A |
| **U-Urtoqqishloq 3** | uxlaʃ | A | jaʃaʃ | B | wʉlmɔq | A | wʉldərmɔq | A | kuraʃmɔq | A | owlamɔq | E | urmɔq | A |
| **U-Urtoqqishloq 4** | uxlamɔq | A | jaʃaʃ | B | wʉlɪʃ | A | wʉldɪrɪʃ | A | kuraʃɪʃ | A | owlamɔq | E | urmɔq | A |
| **U-Zarmanak 3** | uxlaʃ | A | jaʃaʃ | B | ʉliʃ | A | ʉldriʃ | A | kuraʃiʃ | A | ovlaʃ | E | urmɔq | A |
| **U-Zarmanak 4** | uxlamɔq | A | jaʃamɔq | B | ʉlmɔq | A | ʉldərmɔq | A | kuraʃmɔq | A | ovlamɔq | E | urmɔq | A |
| **T-Agalyk** | xobraftan | C | zindagoni | H | murdan | B | kuʃtan | B | guʃtin[[18]](#footnote-19) | G | ʃikɔr | F | zadan | J |
| **T-Kamangaron 1** | xɔraftan | C | zindagi | H | murdan | B | kʊʃtan | B | kuraʃ | A | ɔw | E | zadan | J |
| **T-Kamangaron 2** | xɔbraftan | C | zindagi | H | murdan | B | kyʃtan | B | ʤaŋ[[19]](#footnote-20) | H | ɔw | E | zadan | J |
| **T-Kamangaron 3** | xɔraftan | C | zindagoni | H | murdan | B |  |  |  |  | aɔ | E | zadan | J |
| **T-Kamangaron 4** | xɔraftan | C | zindagi | H | mʊrdan | B | kuʃtan | B | ʤaŋ | H | aɔ | E | zadan | J |
| **T-Kaptarhona 1** | xaɔraftan | C | jaʃarməʃ | B | mørdan | B | kS̩tan | B | kuraʃməʃ | A | aɔ | E | zadan | J |
| **T-Kaptarhona 2** | xaɔraftan | C | zindagi | H | murdan | B | kuʃtan | B |  |  | ɔw | E | zadan | J |
| **T-Kaptarhona 3** | xaɔmeram | C | jaʃam | B | membaram | B | mekʃam | B | guʃtin | G |  |  | mezanam | J |
| **T-Kaptarhona 4** | xaɔraftan | C | zindagoni | H | mʊrdan | B | kS̩tan | B | kuraʃmɨʃ | A | ɔv | E | zadan | J |
| **T-Kaptarhona 5** | xaɔraftan | C | zindagi | H | mr̩dan | B | kS̩tan | B | ʤaŋ | H | aɔ | E | zadan | J |
| **T-Navdî 1** | xob̥kardan | C | zindagi | H | murdan | B | kuʃtan | B | muboriza | I | ʃikɔr | F | zadan | J |
| **T-Navdî 2** | xobraftan | C | zindagi | H | murdan | B | kuʃtan | B | muboriza | I | ʃikɔr | F |  |  |
| **T-Navdî 3** | xob̥kardan | C | zindagi | H | murdan | B | kuʃtan | B |  |  | ʃikɔr | F | lat[[20]](#footnote-21) | K |
| **T-Nimich 1** | xobraftan | C | zindagi | H | murdan | B | kʉʃtan | B | guʃtin | G | ʃikɔr | F | zadan | J |
| **T-Nimich 2** | xɔbraftan | C | hajɔt | I | murdan | B | kuʃtan | B | muboriza | I | ʃikɔr | F | zadan | J |
| **T-Nimich 3** | xɔwraftan | C | zindagi | H | mr̩dan | B | kəʃtan | B | muboriza | I | ʃikɔr | F | zadan | J |
| **T-Nimich 4** | xɔwkardan | C | zindagi | H | mr̩dan | B | kS̩tan | B | muboriza | I | ʃkɔr | F | zadan | J |
| **T-Novmetan 1** | xɔraw | C |  |  | mʊrd̥ | B | kuʃt | B | ʤaŋ˳ | H | axota | G | zad̥ | J |
| **T-Novmetan 2** | xɔraftan | C | zindagi | H | murdan | B | kuʃtan | B | gʉraʤ | A | awʧi | E | zadan | J |
| **T-Nûshor 1** | xɔbʃidan | C | zindagi | H | murdan | B | kS̩tan | B | muboriza | I | ʃikɔr | F | zadan | J |
| **T-Nûshor 2** | xɔbkardan | C | zindagi | H | murdan | B | kS̩tan | B | ʤaŋ | H |  |  | zadan | J |
| **T-Nûshor 3** | xɔwʃidan | C | zindagi | H | mr̩dan | B | kS̩tan | B | muboriza | I | ʃkɔr | F | zadan | J |
| **T-Rishtan 1** | xɔb̥raftan | C | zindagi | H | mr̩dan | B | kS̩tan | B | ʤaŋ | H | ɔw | E | zadan | J |
| **T-Rishtan 2** | xɔb̥raftan | C | zindagi | H | mʊrdan | B | kuʃtan | B | ʤaŋ | H | ɔw | E | zadan | J |
| **T-Rishtan 3** | xɔraftan | C | zindagi | H | mørdan | B | kyʃtan | B | muboriza | I | ʃkɔr | F | zadan | J |
| **T-Shink 1** | xɔbraftan | C | zindagi | H | mʉrdan | B | kʉʃtan | B | gɔʃtin | G | ʃkɔr | F | zadan | J |
| **T-Shink 2** | xɔb | C | zindagi | H | mʉrdan | B | kʉʃtan | B | zʊri | J | ʃikʊr | F | zadan | J |
| **T-Shink 3** | xɔwidan | D | zindagi | H | mʉrdan | B | kʉʃtan | B | mʊbɔriza | I | ʃikɔr | F | zadan | J |
| **T-Urmetan 1** | xɔbraftan | C | zindagi | H | murdan | B | kuʃtan | B | mʊbɔriza | I | ʃikɔr | F | zadan | J |
| **T-Urmetan 2** | xɔbidan | D | zindagi | H | mʉrdan | B | kʉʃtan | B | mʊbɔriza | I | ʃikɔr | F | zadan | J |
| **T-Urmetan 3** | xɔbraftan | C | zindagi | H | mʉrdan | B | kS̩tan | B | məbɔriza | I | ʃikɔr | F | zadan | J |
| **T-Urmetan 4** | xɔbraftan | C | zindagi | H | mʉrdan | B | kʉʃtan | B | zʊri | J | ʃikɔr | F | zadan | J |
| **T-Zarmanak 1** | xɔraftan | C | umər[[21]](#footnote-22) | J | murdan | B | kuʃtan | B | gəraʃ | A | ɔβ | E | zadan | J |
| **T-Zarmanak 2** | xɔraftan | C | zindagi | H | mʊrdan | B | kuʃtan | B | kuraʃ | A | ʃkɔr | F | zadan | J |
| **Y-Dugova 1** | anipidim | E | zindagi | H | amirim | B | atxujimʃ | C | guʃtin | G | ʃikɔr | F | adehimʃ | L |
| **Y-Dugova 2** | nipidak | E | zindagi | H | mirak | B | tuxojak | C | dzaŋi | H | ʃikɔri | F | dihak | L |
| **Y-Safedorak 1** | nipidak | E | zindagi | H | mirak | B | txʊjak | C | ʤaŋi | H | ʃɪkɔri | F | dɪhak | L |
| **Y-Safedorak 2** | nipidak | E | zindagi | H | mirak | B | txʊjak | C | dzaŋi | H | ʃkɔri | F | dɪhak | L |
| **Y-Safedorak 3** |  |  |  |  |  |  |  |  |  |  |  |  |  |  |

| **Informant** | **to cut** | | **to pull** | | **to scratch** | | **to dig** | | **to swim** | | **to fly** | | **to walk** | |
| --- | --- | --- | --- | --- | --- | --- | --- | --- | --- | --- | --- | --- | --- | --- |
| **Ka-Gazli 1** | kʲɪsu | A | itʲeru | A | tɨrnaw | A | qazu | A | ʒʉzu | A | ʉʃu | A | ʒʉru | A |
| **Ka-Gazli 2** | kʲesu | A | itʲeru | A | tɨrnaw | A | qazu | A | ʒʉzu | A | uʃu | A | kʲetu | B |
| **Ka-Gazli 3** | kʲesu | A | itʲeru | A | tɨrnaw | A | qazu | A | ʒʉzʊ | A | ʊʃu | A | barakəl | C |
| **Ka-Gazli 4** | kʲesu | A | itʲeru | A | tɨrnaw | A | qazu | A | ʒʉzu | A | ʊʃu | A | baru | C |
| **Ka-Gazli 5** | kʲesu | A | itʲeru | A | tərna | A | qazu | A | sʉzu | A | ʊʃu | A | ʒʉru | A |
| **Ka-Gazli 6** | kʲesu | A | itʲeru | A | ʒirʊ | B | qazu | A | ʒʉzu | A | ʉʃu | A | kʲeɪtu | B |
| **Ka-Gazli 7** | kʲesu | A | itʲeru | A |  |  | qazu | A | ʒʉzu | A | ʉʃu | A | barʊ | C |
| **Ka-Raushan 1** | kʲesʊː | A | itʲerʊ | A | tɨrnaʊ | A | qazʊː | A | ʒɨzʊː | A | ʊʃʊː | A | barʊː | C |
| **Ka-Raushan 2** | kʲesʊː | A | itʲerʊː | A | tɨrnaʊ | A | qazʊː | A | ʤɨzʊː | A | ʊʃʊː | A | barʊ | C |
| **Ka-Raushan 3** | kʲesʊː | A | itʲerʊː | A | tɨrnaʊ | A | qazʊː | A | ʒɨzʊː | A | ʊʃʊː | A | barʊː | C |
| **Ka-Raushan 4** | kʲesʊː | A | itʲerʊː | A | tɨrnaʊ | A | qazʊː | A | ʒɪzʊː | A | ɪʃʊː | A | parʊː | C |
| **Ki-Akmuz 1** | kʲesyː | A | tyrtyː | B | tɨrmɔː | A | qazʊː | A | syzyː | A | uʧuː | A | baruː | C |
| **Ki-Akmuz 2** | kʲesyː | A | tyrtyː | B | tɨtʊː | C | qazʊː | A | syzyː | A | uʧuː | A | basuː | C |
| **Ki-Akmuz 3** | kʲesyː | A | tyrtyː | B | tɨrmɔː | A | qazʊː | A | syzyː | A | uʧuː | A | baruː | C |
| **Ki-Barskoon** | kʲesyː | A | tʉrtyː | B | tɨrmɔː | A | qazʊː | A | syzyː | A | uʧuː | A | kʲetyː | B |
| **Ki-Kulanak 1** |  |  |  |  | tɨtʊː | C | qazʊː | A | syzyː | A | uʧuː | A | kʲetyː | B |
| **Ki-Kulanak 2** | gʲesyː | A | tyrtyː | B | tɨtʊː | C | qazʊː | A | syzyː | A | uʧuː | A | baruː | C |
| **Ki-Kulanak 3** | gʲes | A | tyrt | B | tɨt | C | qaz̥ | A | syz̥ | A | uʧ | A | bas | C |
| **Ki-Kulanak 4** | kʲesyː | A | tyrtyː | B | tɨrmɔː | A | qazʊː | A | syzyː | A | uʧuː | A | baruː | C |
| **Ki-Kulanak 5** | gʲesyː | A | tyrtyː | B | tɨtʊː | C | qazʊː | A | syzyː | A | uʧuː | A | bas | C |
| **Ki-Orday 1** | kʲesɪʃ | A | tʉrtɪʃ | B | ʒɨrmalaʃ | B | qɒzɪʃ | A | sʉzɪʃ | A | ʉʧɪʃ | A | jyrɪʃ | A |
| **Ki-Orday 2** | kʲesɛm | A | tyrtəm | B | tɨrnaɪm | A | kaβlɛm | B | syzəm | A | ʉʧam | A | kʲetɛm | B |
| **Ki-Orday 3** | kʲesɛt | A | iterɛt | A | tarajt | A | ʧavɛt | B | syzət | A | uʧat | A | kʲetə | B |
| **Ki-Orday 4** | kʲesyː | A | tyrtʊː | B | tɨrmoː | A | qazʊː | A | syzyː | A | yʧʊː | A | kʲetʊː | B |
| **Ki-Tamga** | kʲesyː | A | tyrtyː | B | tɨtʊː | C | qazʊː | A | syzyː | A | uʧuː | A | kʲette | B |
| **KK-Halqabad 1** | kʲesʊː | A | itʲerʊ | A | tɨrnaʊ | A | qazʊː | A | ʒɨzʊː | A | ʊʃʊː | A | ʒʉrʊː | A |
| **KK-Halqabad 2** | kʲesʊː | A | itʲerʊ | A | tɨrnaʊ | A | qazʊː | A | ʒɨzʊː | A | ʊʃʊː | A | ʒʉrʊː | A |
| **KK-Halqabad 3** | kʲesʊː | A | itʲerʊ | A | tɨrnaʊ | A | qazʊː | A | ʒɨzʊː | A | ʊʃʊː | A | ʒʉrʊː | A |
| **KK-Kokdarya 1** | kʲesʊː | A | itʲerʊ | A | tɨrnaʊ | A | qazʊː | A | ʤʉzʊː | A | ʊʃʊː | A | kʲettə | B |
| **KK-Kokdarya 2** | kʲesʊː | A | itʲerʊ | A | tɨrnaʊ | A | qazʊː | A | ʤʉzʊː | A | ʊʃʊː | A | barʊː | C |
| **KK-Kokdarya 3** | kʲesʊː | A | itʲerʊ | A | tɨrnaʊ | A | qazʊː | A | ʤʉzʊː | A | ʊʃʊː | A | barʊː | C |
| **KK-Kokdarya 4** | kʲesʊː | A | itʲerʊ | A | tɨrnap | A | qazʊː | A | ʤʉzʊː | A | ʊʃʊː | A | kʲetʊ | B |
| **KK-Shege 1** | kʲesʊː | A | itʲerʊ | A | tɨrnaʊ | A | qazʊː | A | ʒɨzʊː | A | ʊʃʊː | A | kʲetʊ | B |
| **KK-Shege 2** | kʲesʊː | A | itʲerʊ | A | tɨrnaʊ | A | qazʊː | A | ʒɨzʊː | A | ʉʃʊː | A | kʲetʊ | B |
| **KK-Shege 3** | kʲesʊː | A | itʲerʊ | A | tɨrnaʊ | A | qazʊː | A | ʒɨzʊː | A | ʉʃʊː | A | ʒʉrʊː | A |
| **KK-Shege 4** | kʲesʊː | A | itʲerʊ | A | tɨrnaʊ | A | qazʊː | A | ʒɨzʊː | A | ʊʃʊː | A | parʊː | C |
| **U-Hitoy 1** | kʲesʊː | A | itʲerʊ | A | tɨrnaʊ | A | qazʊː | A | sʉzʊː | A | uʧʊː | A | barʊː | C |
| **U-Hitoy 2** | kʲesʊː | A | iterʊ | A | tɨrnaʊ | A | qazʊː | A | ʤɨzʊː | A | ʊʧʊː | A | ʤʉrʊː | A |
| **U-Hitoy 3** | kʲesʊː | A | tʉrtʊː | B | tɨrnaʊ | A | qazʊː | A | ʤɨzʊː | A | ʉʃʊː | A | parʊː | C |
| **U-Novmetan 3** | kesiʃ | A | itaraʃ | A | tɨrnaʃ | A | kɔvlaʃ | B | suziʃ | A | uʧiʃ | A | jyriʃ | A |
| **U-Soy Mahalla 1** | kʲetmɔq | A | itariʃ | A | tɨrnamɔq | A | kaβlaʃ | B | sʉzmɔq | A | yʧmɔq | A | bormɔq | C |
| **U-Soy Mahalla 2** | kʲetmɔq | A | tʉrtmɔq | B | tɨrnamɔq | A | ʧaβlamɔq | B | sʉndərmɔq | B | ʉʧmɔq | A | barmɔq | C |
| **U-Soy Mahalla 3** | kʲesiʃ | A | itariʃ | A | jʉliʃ | D | kaβlaʃ | B | sʉziʃ | A | ʉʧiʃ | A | kʲetɪʃ | B |
| **U-Urtoqqishloq 1** | kesiʃ | A | itariʃ | A | jylmɔq | D | kavlamɔq | B | sʉziʃ | A | uʧɪʃ | A | kʲetɪʃ | B |
| **U-Urtoqqishloq 2** | kʲesmɔq | A | itarmɔq | A | tɪrnamɔq | A | kaβlamɔq | B | suzmɔq | A | uʧmɔq | A | kʲettə | B |
| **U-Urtoqqishloq 3** | kʲesmɔq | A | itarmɔq | A | tɪrnamɔq | A | kaβlamɔq | B | suzmɔq | A | uʧmɔq | A | kʲetmɔq | B |
| **U-Urtoqqishloq 4** | kʲesmɔq | A | ɪtarɪʃ | A | kaʃlamɔq | E | kɔvlamɔq | B | sʉzmɔq | A | uʧɪʃ | A | bərmɔq | C |
| **U-Zarmanak 3** | kʲesiʃ | A | itariʃ | A | xastakəlmɔq | F | kɔvlaʃ | B | suziʃ | A | uʧiʃ | A | juriʃ | A |
| **U-Zarmanak 4** | kʲesmɔq | A | itarmɔq | A | tərnamɔq | A | kɔwlamɔq | B | suzmɔq | A | uʧmɔq | A | jyrmɔq | A |
| **T-Agalyk** | bʊridan | C | tʲela | D | xarɔʃidan | H | kɔftan | B | ɔbbɔzi[[22]](#footnote-23) | F | paridan | B | raftan | D |
| **T-Kamangaron 1** | buridan | C | tʲela | D | xanʤɔla | J | koftan | B | ʃinɔ | G | paridan | B | raftan | D |
| **T-Kamangaron 2** | buridan | C | tela | D | xanʤɔla | J | kɔftan | B | habɔzi | F | paridan | B | raftan | D |
| **T-Kamangaron 3** | ʧɔ | D | tala | D | xanʤɔra | J | koftan | B |  |  | paridan | B |  |  |
| **T-Kamangaron 4** | rʲeza[[23]](#footnote-24) | E | tela | D | xanʤɔ | J | koftan | B | habɔzi | F | paridan | B | raftan | D |
| **T-Kaptarhona 1** | bridan | C | tela | D | xør | H | koftan | B | haβozi | F | paridan | B | raftan | D |
| **T-Kaptarhona 2** | bəridan | C | tela | D | xur | H | koftan | B | awvozi | F | paridan | B | raftan | D |
| **T-Kaptarhona 3** | mebaram | C | tela | D | xra | H | mekanom | C |  |  | meparam | B | meram | D |
| **T-Kaptarhona 4** | bridan | C | tela | D | xør | H | koftan | B | habozi | F | paridan | B | gaʃtan | E |
| **T-Kaptarhona 5** | bridan | C | tela | D | xr̩ | H | koftan | B | habozi | F | paridan | B | raftan | D |
| **T-Navdî 1** | buridan | C | tela | D | xərɔʃidan | H | koftan | B | ɔbɔzi | F | paridan | B | raftan | D |
| **T-Navdî 2** | ara | F | tʲela | D | xaroʃidan | H | kandan | C | ʃino | G | parvɔz | C | raftan | D |
| **T-Navdî 3** | buridan | C | tela | D | xaroʃidan | H | kandan | C | ɔbɔzi | F | parvɔz | C | raftan | D |
| **T-Nimich 1** | buridan | C | tʲela | D | kandan | K | kandan | C | ɔbɔzi | F | paridan | B | raftan | D |
| **T-Nimich 2** | buridan | C | tʲela | D | xarɔʃidan | H | kandan | C | ʃino | G | paridan | B |  |  |
| **T-Nimich 3** | buridan | C | tʲela | D | xərɔʃidan | H | kɔftan | B | ɔbɔzi | F | parvɔz | C | raftan | D |
| **T-Nimich 4** | buridan | C | tela | D | xərɔʃidan | H | kɔftan | B | ɔbɔzi | F | parvɔz | C | raftan | D |
| **T-Novmetan 1** | buridan | C | tʲela | D | xanʤɔl | J | kandan | C | ɔbɔzi | F | paridan | B | raftan | D |
| **T-Novmetan 2** | buridan | C | tʲela | D | xanʤɔl | J | kɔftan | B | ɔb | F | paridan | B | raw | D |
| **T-Nûshor 1** | bəridan | C | tʲela | D | kandan | K | kɔftan | B | ɔbɔzi | F | parvɔz | C | raftan | D |
| **T-Nûshor 2** | buridan | C | tʲela | D | kandan | K |  |  | ɔbɔzi | F | paridan | B | biʊ | F |
| **T-Nûshor 3** | bəridan | C | tʲela | D | xəroʃidan | H | kandan | C | ʃinɔ | G | paridan | B | raftan | D |
| **T-Rishtan 1** | buridan | C | tela | D | kandan | K | koftan | B | randa | H | paridan | B | raftan | D |
| **T-Rishtan 2** | buridan | C | tʲela | D | kandan | K | koftan | B | jandɛ | H | paridan | B | raftan | D |
| **T-Rishtan 3** | børidan | C | tela | D | kandan | K | koftan | B | janda | H | paridan | B | raftan | D |
| **T-Shink 1** | bəridan | C | tela | D | kandan | K | kɔftan | B | landa | H | paridan | B | raftan | D |
| **T-Shink 2** | majda | G | tela | D | xarɔʃidan | H | kandan | C | ʃino | G | paridan | B | raftan | D |
| **T-Shink 3** | bəridan | C | tela | D | xarɔʃidan | H | kɔftan | B | ʃino | G | paridan | B | raftan | D |
| **T-Urmetan 1** | buridan | C | tela | D | ɣɔzidan | L | kɔftan | B | ɔbɔzi | F | paridan | B | raftan | D |
| **T-Urmetan 2** | bəridan | C | tela | D | xaroʃidan | H | kɔftan | B | ɔbɔzi | F | paridan | B | raftan | D |
| **T-Urmetan 3** | bəridan | C | tela | D | xar | H | kɔftan | B | ʃino | G | parvɔz | C | raftan | D |
| **T-Urmetan 4** | bəridan | C | tela | D | ɣɔzidan | L | kɔftan | B |  |  | paridan | B | raftan | D |
| **T-Zarmanak 1** | buridan | C | tela | D | xanʤɔl | J | kandan | C | ɔb | F | paridan | B | raftan | D |
| **T-Zarmanak 2** | buridan | C | tela | D | xanʤɔl | J | kɔftan | B | ɔb | F | paridan | B | raftan | D |
| **Y-Dugova 1** | pakaʃ | H | telɐ | D | akanimʃ | K | akanim | C | ɔbɔzi | F | aparim | B | atirim | G |
| **Y-Dugova 2** | rezai | E | telai | D | xarajsak | H | kanak | C | ɔbbɔzi | F | parak | B | tirak | G |
| **Y-Safedorak 1** | majdai | G | tʲelɪ | D | kanak | K | koβak | B | ɔbɔzi | F | furak | B | tirak | G |
| **Y-Safedorak 2** | kʊʃak | I | tʲelɪ | D | xʊrʊʃak | H | kanak | C |  |  | furak | B | tirak | G |
| **Y-Safedorak 3** |  |  |  |  |  |  |  |  |  |  |  |  |  |  |

| **Informant** | **to come** | | **to lie** | | **to sit** | | **to stand** | | **to turn** | | **to fall** | | **to give** | |
| --- | --- | --- | --- | --- | --- | --- | --- | --- | --- | --- | --- | --- | --- | --- |
| **Ka-Gazli 1** | kʲilʊ | A | ʒatu | A | ɔtəru | A | tru | A | ajnawʊ | A | qʊlaw | A | bʲɪru | A |
| **Ka-Gazli 2** | kʲelu | A | ʒatu | A | wotru | A | tru | A | ajnalu | A | qʊlaw | A | bʲɪru | A |
| **Ka-Gazli 3** | kʲeldø | A | ʒatu | A | wɔtru | A | tru | A | ajnaldrʊ | A | qʊlaw | A | bʲeru | A |
| **Ka-Gazli 4** | kilu | A | ʒatu | A | wotru | A | tru | A | ajnaldru | A | qʊlaw | A | bʲeru | A |
| **Ka-Gazli 5** | kʲelu | A | ʒat | A | wotər | A | tər | A | ajnalʊ | A | qʊlaw | A | bʲɪr | A |
| **Ka-Gazli 6** | kʲelu | A | ʒatu | A | wotru | A | tru | A | tʲensʲelu | B | qolaw | A | bʲeru | A |
| **Ka-Gazli 7** | kʲelu | A | ʃatu | A | wotru | A | tər | A | ajnaldrʊ | A | qʊlaw | A | bʲeru | A |
| **Ka-Raushan 1** | kʲelʊː | A | ʒatʊː | A | wɔtrʊː | A | trʊː | A | ajlandrʊː | A | ʒɨɣlʊː | B | bʲerʊː | A |
| **Ka-Raushan 2** | kʲelʊː | A | ʒatʊː | A | wɔtərʊː | A | trʊː | A | ajlandrʊː | A | ʒɨɣɨlʊː | B | bʲerʊː | A |
| **Ka-Raushan 3** | kʲelʊː | A | ʒatʊː | A | wɔtrʊː | A | trʊː | A | ajnaldrʊː | A | qʊlaʊ | A | bʲerʊː | A |
| **Ka-Raushan 4** | kʲelʊː | A | ʒatʊː | A | wɔtrʊː | A | trʊː | A | ajnaldrʊː | A | qʊlaʊ | A | bʲerʊː | A |
| **Ki-Akmuz 1** | kʲelyː | A | ʤatʊː | A | wɔtrʊː | A | tʊrʊː | A | ajlandrʊː | A | ʤɨgɨluː | B | bʲeryː | A |
| **Ki-Akmuz 2** | kʲelyː | A | ʤatʊː | A | wɔtrʊː | A | tʊrʊː | A | ajlanʊː | A | ʤɨgɨluː | B | bʲeryː | A |
| **Ki-Akmuz 3** | kʲelyː | A | ʤatʊː | A | wɔtrʊː | A | tʊrʊː | A | ajlanʊː | A | ʤɨgɨluː | B | bʲeryː | A |
| **Ki-Barskoon** | kʲelʉː | A | ʤat | A | wɔtrʊː | A | tʊr | A | tegerɛt | C | tɨsʉː | C | bʲerʉː | A |
| **Ki-Kulanak 1** | kʲelyː | A | ʤatʊː | A | wɔtrʊː | A | tʊrʊː | A | ajlanʊː | A | ʤɨgɨluː | B | bʲeryː | A |
| **Ki-Kulanak 2** | gʲelyː | A | ʤatʊː | A | wɔtrʊː | A | tʊrʊː | A | ajlanʊː | A | ʤɨgɨluː | B | bʲeryː | A |
| **Ki-Kulanak 3** | gʲel | A | ʤat | A | wɔtrʊː | A | tʊr | A | ajlan | A | ʤɨgɨl | B | bʲer | A |
| **Ki-Kulanak 4** | kʲelyː | A | ʤatʊː | A | wɔtrʊː | A | tʊrʊː | A | ajlandrʊː | A | ʤɨgɨlʊː | B | bʲeryː | A |
| **Ki-Kulanak 5** | kʲelyː | A | ʤatʊː | A | wɔtrʊː | A | tʊrʊː | A | ajlanʊː | A | ʤɨgɨlʊː | B | bʲeryː | A |
| **Ki-Orday 1** | gʲelɪʃ | A | ʒatɪʃ | A | ɔtʊrʊː | A | turɨʃ | A | ajlaniʃ | A | ʤigɨlɪʃ | B | bʲerɪʃ | A |
| **Ki-Orday 2** | gʲelɛm | A | ʤatam | A | ɔtɨram | A | turam | A | ajlanam | A | ʤigɨlam | B | bʲerɛm | A |
| **Ki-Orday 3** | gʲeldə | A | ʤatat | A | ɔtərɐt | A | turat | A | ajlandrat | A | ʧøt | C | bʲerɛt | A |
| **Ki-Orday 4** | kʲelʊː | A | ʤatʊː | A | ɔtʊrʊː | A | tʊrʊː | A | ajlandɨrʊː | A | kulajt | A | bʲerʊː | A |
| **Ki-Tamga** | kʲelyː | A | ʤat | A | wɔtər | A | tʊr | A | tegerɛn | C | ʤɨgɨluː | B | bʲeryː | A |
| **KK-Halqabad 1** | kʲelʊː | A | ʒatʊː | A | wɔtrʊː | A | trʊː | A | ajlandrʊ | A | ʒɨɣlʊː | B | bʲerʊ | A |
| **KK-Halqabad 2** | kʲelʊː | A | ʒatʊː | A | wɔtrʊː | A | trʊː | A | ajlandrʊ | A | ʒɨɣlʊː | B | bʲerʊ | A |
| **KK-Halqabad 3** | kʲelʊː | A | ʒatʊː | A | wɔtrʊː | A | trʊː | A | ajlanʊ | A | ʒɨɣlʊː | B | bʲerʊ | A |
| **KK-Kokdarya 1** | kʲeldə | A | ʤatʊː | A | wɔtərʊː | A | tʊrdøʊ | A | ajlanʊː | A | ʒeɣøldø | B | bʲerdə | A |
| **KK-Kokdarya 2** | kʲelʊ | A | ʒatʊ | A | wɔtərʊː | A | tʉrʊː | A | ajlandrʊː | A | ʒɨɣlʊː | B | bʲerʊ | A |
| **KK-Kokdarya 3** | kʲelʊː | A | ʒatʊː | A | wɔtərʊː | A | trʊː | A | ajlantrʊː | A | qʊlaʊ | A | bʲerʊː | A |
| **KK-Kokdarya 4** | kʲelʊː | A | ʒatʊː | A | wɔtrʊː | A | trʊː | A | ajlandrʊː | A | ʒɨɣlʊː | B | bʲerʊː | A |
| **KK-Shege 1** | kʲelʊː | A | ʒatʊː | A | wɔtrʊː | A | trʊː | A | ajlanʊ | A | qʊlaʊ | A | bʲerʊː | A |
| **KK-Shege 2** | kʲelʊː | A | ʒatʊː | A | wɔtrʊː | A | trʊː | A | ajlandrʊ | A | qʊlaʊ | A | bʲerʊː | A |
| **KK-Shege 3** | kʲelʊː | A | ʃatʊː | A | wɔtrʊː | A | trʊː | A | ajlandrʊ | A | ʒɨɣlʊː | B | bʲerʊ | A |
| **KK-Shege 4** | kʲelʊː | A | ʒatʊː | A | wɔtrʊː | A | trʊː | A | ajlanʊ | A | qʊlaʊ | A | bʲerʊ | A |
| **U-Hitoy 1** | kʲelʊː | A | ʤatʊː | A | wɔtərʊː | A | trʊː | A | ajlandrʊ | A |  |  | bʲerʊː | A |
| **U-Hitoy 2** | kʲelʊː | A | ʤatʊː | A | wɔtrʊː | A | trʊː | A | ajlandrʊ | A | ʧʊː | B | bʲerʊː | A |
| **U-Hitoy 3** | kʲelʊː | A | ʤatʊː | A | wɔtərʊː | A | trʊː | A | ajlandrʊ | A | qʊlaʊ | A | bʲerʊː | A |
| **U-Novmetan 3** | keliʃ | A | jɔtiʃ | A | ʉtəriʃ | A | tur | A | ajlaniʃ | A | jiqɪliʃ | D | ber | A |
| **U-Soy Mahalla 1** | kʲeliʃ | A | jɔtiʃ | A | utɨriʃ | A | turmɔq | A | ajlaniʃ | A | jɪqilmɔq | D | bʲermɔq | A |
| **U-Soy Mahalla 2** | kʲelmɔq | A | jɔtmɔq | A | wɔtɨrmɔq | A | turmɔq | A | ajlanmɔq | A | jiqilmɔq | D | bʲɪrmɔq | A |
| **U-Soy Mahalla 3** | kʲeliʃ | A | jɔtiʃ | A | ɔtɨriʃ | A | turiʃ | A | ajlaniʃ | A | jiqɨliʃ | D | bʲeriʃ | A |
| **U-Urtoqqishloq 1** | kʲelɪʃ | A | jɔtɪʃ | A | wʉtɪrɪʃ | A | turɪʃ | A | ajlaniʃ | A | jɪqɪlɪʃ | D | bʲerɪʃ | A |
| **U-Urtoqqishloq 2** | kʲelmɔq | A | jɔtmɔq | A | wʉtərmɔq | A | tʊrmɔq | A | ajlanmɔq | A | jɪqɪlmɔq | D | bʲermɔq | A |
| **U-Urtoqqishloq 3** | kʲɪlmɔq | A | jɔtmɔq | A | ʊtərmɔq | A | tyrmɔq | A | ajlanmɔq | A | jɪqɪlmɔq | D | bʲermɔq | A |
| **U-Urtoqqishloq 4** | kʲɪlmɔq | A | jɔtmɔq | A | wʉtɪrɪʃ | A | tʉrmɔq | A | ajlanmɔq | A | jɪqɪlmɔq | D | bʲermɔq | A |
| **U-Zarmanak 3** | keliʃ | A | jɔtiʃ | A | utəriʃ | A | turmɔq | A | ajlanmɔq | A | jiqiliʃ | D | bʲermɔq | A |
| **U-Zarmanak 4** | kʲɪlmɔq | A | kʲesmɔq | B | utərmɔq | A | turmɔq | A | ajlanmɔq | A | jiqəlmɔq | D | bʲɪrmɔq | A |
| **T-Agalyk** | ɔmadan | B | xɔbraftan | C | ʃiʃtan | B | rɔst | B | ʧarx | H | aftodan | H | dɔdan | B |
| **T-Kamangaron 1** | ɔmadan | B | xɔraftan | C | ʃiʃtan | B | rɔst | B | ʧarɣ | H | aftidan | H | dɔdan | B |
| **T-Kamangaron 2** | ɔmadan | B | xɔbraftan | C | ʃiʃtan | B | rɔst | B | ajnali | A | ɣildan | J | dodan | B |
| **T-Kamangaron 3** | ɔmadan | B | xɔraftan | C | ʃitan | B | xɪstan | C | ajnali | A |  |  |  |  |
| **T-Kamangaron 4** | ɔmadan | B | ʧøzili | E | ʃiʃtan | B | istodan | D | ajnali | A | aftidan | H | dɔdan | B |
| **T-Kaptarhona 1** | ʊmadan | B | xaɔraftan | C | ʃiʃtan | B | ʧəq | E | før | J | ɣaltodan | J | dodan | B |
| **T-Kaptarhona 2** | ɔmadan | B | xobraftan | C | ʃiʃtan | B | ʧərt | E | fir | J | ɣaltodan | J | dodan | B |
| **T-Kaptarhona 3** | meɔm | B |  |  | mʲeʃinam | B | ʧɛrt | E | fər | J |  |  | dodan | B |
| **T-Kaptarhona 4** | madan | B | xawraftan | C | ʃiʃtan | B | ʧɛq | E | før | J | ɣaldɔt | J | dot | B |
| **T-Kaptarhona 5** | umadan | B | xawraftan | C | ʃiʃtan | B | ʧq ̩ | E | fr̩ | J | ɣaltɔt | J | dodan | B |
| **T-Navdî 1** | omadan | B | xobraftan | C | ʃiʃtan | B | istodan | D | fr̩ | J | uftodan | H | dodan | B |
| **T-Navdî 2** | omadan | B | xobraftan | C | ʃiʃtan | B | rɔst | B | gird | K | uftodan | H | dodan | B |
| **T-Navdî 3** | biw | C | xɔb̥ | C | ʃiʃtan | B | rɔst | B | tɔv | L | ɣaltidan | J | te | C |
| **T-Nimich 1** | omadan | B | xob | C | ʃiʃtan | B | rɔst | B | fər | J | aftodan | H | dodan | B |
| **T-Nimich 2** | ɔmadan | B | xob | C | ʃiʃtan | B | rɔst | B | ʧarx | H | aftodan | H | dodan | B |
| **T-Nimich 3** | ɔmadan | B | darɔz | D | ʃiʃtan | B | rɔst | B | tɔw | L | aftodan | H | dodan | B |
| **T-Nimich 4** | umadan | B | darɔz | D | ʃiʃtan | B | istodan | D | ʧarx | H | uftodan | H | dodan | B |
| **T-Novmetan 1** | ɔmdan | B | xɔraftan | C | ʃiʃtan | B | xestan | C | girt | K | ɣaltidan | J | dodan | B |
| **T-Novmetan 2** |  |  | xɔraw | C | ʃiʃtan | B | xez | C |  |  | ɣaltidan | J | dɔdan | B |
| **T-Nûshor 1** | ɔmadan | B | xɔb | C | ʃiʃtan | B | istodan | D | tɔftan | L | uftodan | H | dodan | B |
| **T-Nûshor 2** | biʊ | C | xɔb | C | ʃiʃtan | B | istodan | D | tɔb̥ | L | uftodan | H | dodan | B |
| **T-Nûshor 3** | ʊmadan | B | xɔb | C | ʃiʃtan | B | ʧx̩t | E | fr̩ | J | uftodan | H | dodan | B |
| **T-Rishtan 1** | ɔmadan | B | xɔb | C | ʃiʃtan | B | xestan | C | ʧarh | H | ɣaltidan | J | dodan | B |
| **T-Rishtan 2** | ɔmadan | B | xɔb | C | ʃiʃtan | B | rɔst | B | ʧarh | H | ɣaltidan | J | dɔdan | B |
| **T-Rishtan 3** | ɔmadan | B | xɔraftan | C | ʃʃtan | B | rɔst | B | ʧarɣ | H | ɣaltidan | J | dɔdan | B |
| **T-Shink 1** | ɔmadan | B | xɔbraftan | C | ʃiʃtan | B | istɔdan | D | tɔw | L | ɣaltidan | J | dɔdan | B |
| **T-Shink 2** | ʊmadan | B | xɔbraftan | C | ʃiʃtan | B | istɔdan | D | tɔb̥ | L | ɣaltidan | J | dɔdan | B |
| **T-Shink 3** | ɔmadan | B | xɔbraftan | C | ʃiʃtan | B | rɔst | B | gird | K | aftidan | H | dɔdan | B |
| **T-Urmetan 1** | ɔmadan | B | xɔbraftan | C | ʃiʃtan | B | istex | D | tɔb | L | ɣaltidan | J | dodan | B |
| **T-Urmetan 2** | ɔmadan | B | xɔbidan | C | ʃiʃtan | B | istodan | D | ʧarx | H | ɣaltidan | J | dɔdan | B |
| **T-Urmetan 3** | ɔmadan | B | xɔbraftan | C | ʃiʃtan | B | rɔst | B | ʧarx | H | aftidan | H | dɔdan | B |
| **T-Urmetan 4** | ɔmadan | B | xɔbraftan | C | ʃiʃtan | B | xɛstan | C |  |  | ɣaltidan | J | dɔdan | B |
| **T-Zarmanak 1** | ɔmdan | B | xɔraftan | C | ʃiʃtan | B | rɔstodan | B | ɣir | K | aftidan | H | dodan | B |
| **T-Zarmanak 2** | ɔmdan | B | xɔraftan | C | ʃɪʃtan | B | rɔst | B | gir | K | ɣaltidan | J | dodan | B |
| **Y-Dugova 1** | avɔrim | D | anɪpidim | F | anidim | C | awʊʃtim | D | tɔb̥ | L | atiraʃim | K | atfarim | D |
| **Y-Dugova 2** | avɔw | D | nipidak | F | anid | C | uʃtak | D | daβri | M | divɪak | L | tfarak | D |
| **Y-Safedorak 1** | βɔβak | D | nipidak | F | nidak | C | jaxak | F | tɔpɪ | L | tiraʃak | M | tfarak | D |
| **Y-Safedorak 2** | βɔβak | D | nipidak | F | nidak | C | ʊʃtak | D | tɔbak | L | tiraʃak | M | tfarak | D |
| **Y-Safedorak 3** |  |  |  |  |  |  |  |  |  |  |  |  |  |  |

| **Informant** | **to hold** | | **to squeeze** | | **to wash** | | **to wipe** | | **to pull** | | **to throw** | | **to tie** | |
| --- | --- | --- | --- | --- | --- | --- | --- | --- | --- | --- | --- | --- | --- | --- |
| **Ka-Gazli 1** | ʉstaw | A | qsu | A | ʒuw | A | sʉrtu | A | tartu | A | laqtəru | A | bajlaw | A |
| **Ka-Gazli 2** | ʉstaw | A | qəsu | A | ʒuwu | A | sʉrtu | A | tartu | A | tastaw | B | bajlaw | A |
| **Ka-Gazli 3** | ʊstavtəru | A | qsu | A | ʒuwu | A | sʉrtunu | A | tartu | A | tastapʲetu | B | bajlaw | A |
| **Ka-Gazli 4** | ʊstaw | A | qsu | A | ʒuw | A | sʉrtu | A | tartu | A | laχtəru | A | bajlaw | A |
| **Ka-Gazli 5** | ʊsta | A | qəs | A | ʒuw | A | sʉrt | A | tartu | A | tastaw | B | toχu | C |
| **Ka-Gazli 6** | ʉstaw | A | qsu | A | ʒuwu | A | sʉrtu | A | tartu | A | tastaw | B | bajlaw | A |
| **Ka-Gazli 7** | ʉstaw | A | qsu | A | ʃuwu | A | sʉrtu | A | tartu | A | laqtru | A | bajlaw | A |
| **Ka-Raushan 1** | ʊslaʊ | A | qsʊː | A | ʒʊʊ | A | sʉrtʊː | A | sɔzʊː | B | tastaʊ | B | bajloː | A |
| **Ka-Raushan 2** | ʊstaʊ | A | qsʊː | A | ʒʊʊ | A | sʉrtʊː | A | tartʊ | A | laqtrʊ | A | bajlaʊ | A |
| **Ka-Raushan 3** | ʊstaʊ | A | qsʊː | A | ʒʊʊ | A | sʉrtʊː | A | tartʊ | A | laqtrʊ | A | bajlaʊ | A |
| **Ka-Raushan 4** | ʉstaʊ | A | kʲesʊː | A | ʒʊʊ | A | sʉrtʊː | A | tartʊː | A | laχtrʊ | A | bajlaʊ | A |
| **Ki-Akmuz 1** | qarmɔː | B | qɨsʊː | A | ʤuː | A | syrtyː | A | tartʊː | A | ɨrgɨtʊː | C | bajlɔː | A |
| **Ki-Akmuz 2** | qarmɔː | B | qɨsʊː | A | ʤuː | A | syrtyː | A | tartʊː | A | ɨrɣɨtʊː | C | bajlɔː | A |
| **Ki-Akmuz 3** | qarmɔː | B | qɨsʊː | A | ʤuː | A | syrtyː | A | tartʊː | A | ɨrgɨtʊː | C | bajlɔː | A |
| **Ki-Barskoon** | qarmɔː | B | sɨɣʊː | B | ʤuː | A | aːrʧʊː | B | tart | A | ɨrɣɨt | C | bajlɔː | A |
| **Ki-Kulanak 1** | qarmɔː | B | qɨsʊː | A | ʤuː | A | syrtyː | A | tartʊː | A | ɨrgɨtʊː | C | bajlɔː | A |
| **Ki-Kulanak 2** | qarmɔː | B | qɨsʊː | A | ʤuː | A | syrtyː | A | tartʊː | A | ɨrgɨttʊː | C | bajlɔː | A |
| **Ki-Kulanak 3** | qarma | B | qɨs | A | ʤuː | A | syrt | A | ʧɔj | B | ɨrgɨt | C | bajla | A |
| **Ki-Kulanak 4** | qarmɔː | B | qɨsʊː | A | ʤuː | A | syrtyː | A | tartʊː | A | ɨrɣɨtʊː | C | bajlɔː | A |
| **Ki-Kulanak 5** | qarmɔː | B | qɨsʊː | A | ʤuː | A | syrtyː | A | tartʊː | A | ɨrɣɨtʊː | C | bajlɔː | A |
| **Ki-Orday 1** | ʉʃau | A | sɨɣuː | B | ʒʊwʊ | A | artɪʃ | B | tɒrtɪʃ | A | taʃtʊː | B | bajlɪʃ | A |
| **Ki-Orday 2** | qarman | B | kɨsam | A | ʤuβam | A | arʧam | B | tartam | A | taʃtam | B | bajlam | A |
| **Ki-Orday 3** | ʉʃɐt | A | qɨsat | A | ʒuβat | A | artat | B | iterɛt | A | taʃat | B | bajlɛt | A |
| **Ki-Orday 4** | karmɔː | B |  |  | ʒʊʊ | A |  |  | tartʊː | A | ɨrgɨttʊː | C | bajlanʊː | A |
| **Ki-Tamga** | qarma | B | sɨɣʊː | B | ʤuː | A | aːrʧə | B | tartʊː | A | ɨrgɨtʊː | C | bajla | A |
| **KK-Halqabad 1** | ʉslatɨrʊ | A | qsʊ | A | ʒʊwʊ | A | sprʊː | C | sɔzʊ | B | laqtɨrʊ | A | bajlaʊ | A |
| **KK-Halqabad 2** | ʉslaʊ | A | qsʊ | A | ʒʊːnʊ | A | sprʊː | C | sɔzʊ | B | laqtɨrʊ | A | bajlaʊ | A |
| **KK-Halqabad 3** | ʊstaʊ | A | qsʊ | A | ʒʊwʊ | A | sprʊː | C | sɔzʊ | B | laqtɨrʊ | A | bajlaʊ | A |
| **KK-Kokdarya 1** | ustaʊ | A | qsuː | A | ʒuwənʊː | A | səpərʊː | C | tartə | A | zəŋəttə | D | bajlaʊ | A |
| **KK-Kokdarya 2** | uslaʊ | A | qsʊ | A | ʒʊʊ | A | səprʊː | C | sɔzʊ | B | laqtɨrʊː | A | bajlaʊ | A |
| **KK-Kokdarya 3** | ʉslaʊ | A | qsʊː | A | zʊʊ | A | səprʊː | C | tartʊ | A | laqtɨrʊː | A | bajlanu | A |
| **KK-Kokdarya 4** | ʉslaʊ | A | qsʊː | A | ʒɨwʊː | A | səpərʊː | C | tartʊ | A | zɨŋkɨtʊ | D | bajlaʊ | A |
| **KK-Shege 1** | ʊslaʊ | A | qsʊ | A | ʒʊwʊ | A | sɨrtʊ | A | tartʊ | A | laqtɨrʊ | A | bajlaʊ | A |
| **KK-Shege 2** | ʊslaʊ | A | qsʊ | A | ʒʊwʊ | A | sɨpɨrʊː | C | tartʊ | A | laqtɨrʊ | A | bajlaʊ | A |
| **KK-Shege 3** | ʊslaʊ | A | qsʊː | A | ʒʊwʊ | A | sɨprʊː | C | sɔzʊ | B | laqtɨrʊ | A | bajlanəsʊ[[24]](#footnote-25) | A |
| **KK-Shege 4** | ʉslaʊ | A | qsʊ | A | ʒʊwʊ | A | spɨrʊː | C | tartʊ | A | laqtɨrʊ | A | bajlaʊ | A |
| **U-Hitoy 1** | ʊʃlaʊ | A | qsʊ | A | ʤʊwʊ | A | cørtʊ | A | tartʊ | A | taʃlaʊ | B | bajlaʊ | A |
| **U-Hitoy 2** | ʉslaʊ | A | qsʊ | A | ʤʊwʊ | A | sʉrtʊ | A | tartʊ | A | laχtɨrʊ | A | bajlaʊ | A |
| **U-Hitoy 3** | ʉʃlaʊ | A | qsʊ | A | ʤʊβʊ | A | sɨrtʊ | A | tartʊ | A | laχtɨrʊ | A | bajlaʊ | A |
| **U-Novmetan 3** | uʃla | A | qsiʃ | A | juviʃ | A | artiʃ | B | tɔrt | A | tajla | B | bɔɣla | A |
| **U-Soy Mahalla 1** | tʊtmɔq | D | siqiʃmɔq | C | jumɔq | A | artiniʃ | B | tɔrtmɔq | A | taʃlamɔq | B | bajlamɔq | A |
| **U-Soy Mahalla 2** | uʃlamoq | A | qismɔq | A | juvmɔq | A | artmɔq | B | tartmɔq | A | taʃlamɔq | B | bajlamɔq | A |
| **U-Soy Mahalla 3** | ʉʃlaʃ | A | qsiʃ | A | juβiʃ | A | artɪʃ | B | tɔrtɪʃ | A | taslaʃ | B | bajlaʃ | A |
| **U-Urtoqqishloq 1** | uʃlaʃ | A | qsɪʃ | A | juwɪʃ | A | sʉrtɪʃ | A | tɔrtɪʃ | A | wɔtmɔq | E | bɔɣlaʃ | A |
| **U-Urtoqqishloq 2** | uʃlamɔq | A | qs̩mɔq | A | juːmɔq | A | sʉrtmɔq | A | tɔrtmɔq | A | taʃlamɔq | B | bɔɣlamɔq | A |
| **U-Urtoqqishloq 3** | uʃlamɔq | A | sq ̩mɔq | C | jumɔq | A | sʉrtmɔq | A | tɔrtmɔq | A | wɔtmɔq | E | bɔɣlamɔq | A |
| **U-Urtoqqishloq 4** | uʃlamɔq | A | qs̩mɔq | A | juwɪʃ | A | sʉrtmɔq | A | tɔrtmɔq | A | taʃlamɔq | B | bɒɣlamɔq | A |
| **U-Zarmanak 3** | uʃlamɔq | A | qismɔq | A | juviʃ | A | artmɔq | B | tortiʃ | A | taʃlaʃ | B | bɔɣlaʃ | A |
| **U-Zarmanak 4** | uʃlamɔq | A | qsmɔq | A | juvmɔq | A | artmɔq | B | tɔrtmɔq | A | taʃlamɔq | B | bɔɣlamɔq | A |
| **T-Agalyk** | dɔʃtan | E | qisi kardan | A | ʃuʃtan | B | pɔk | I | kaʃidan | C | partɔftan | G | bastan | G |
| **T-Kamangaron 1** | dɔʃtan | E | skɔndan | H | ʃyʃtan | B | pɔk | I | kaʃidan | C | partoftan | G | bastan | G |
| **T-Kamangaron 2** | dɔʃʲtan | E | qisi | A | ʃustan | B | pɔk | I | kaʃidan | C | partoftan | G | bastan | G |
| **T-Kamangaron 3** | dɔʃʲtan | E | qsi | A | ʃytan | B | pɔk | I |  |  | partoftan | G | bastan | G |
| **T-Kamangaron 4** | dɔʃtan | E | qsi | A | ʃuʃtan | B | pɔk | I | kaʃidan | C |  |  | ula | K |
| **T-Kaptarhona 1** | qapidan | F | ʤaqidan | J | ʃuftan | B | ruftan | K | kaʃidan | C | partoftan | G | bastan | G |
| **T-Kaptarhona 2** | qapidan | F | ʤɔqidan | J | suʃtan | B | ruftan | K | kaʃidan | C | partoftan | G | bastan | G |
| **T-Kaptarhona 3** | mʲeqapam | F | mʲeʤəqam | J | mʲeʃum | B | toza[[25]](#footnote-26) | L | mʲekaʃam | C | mʲepartom | G | mʲebandom | G |
| **T-Kaptarhona 4** | qapit | F | sqɨmɨs | C | ʃuftan | B | qɔq[[26]](#footnote-27) | J | kaʃit | C | partoft | G | bastak | G |
| **T-Kaptarhona 5** | qapidan | F | ʤəqidan | J | ʃuftan | B | ruftan | K | kaʃidan | C | partoftan | G | bastan | G |
| **T-Navdî 1** | qapidan | F | ʤʊqidan | J | ʃʉʃtan | B | ʃʉʃtan | N | kaʃidan | C | partɔftan | G | bastan | G |
| **T-Navdî 2** | qapidan | F | ʤaqidan | J | ʃyʃtan | B | tɔza | L | kaʃidan | C | partɔftan | G | bastan | G |
| **T-Navdî 3** | qapidan | F | ʤaqidan | H | ʃʉstan | B | tɔza | L | taraŋ | D | partɔftan | G |  |  |
| **T-Nimich 1** | qapidan | F | ʤəqidan | J | ʃʉstan | B | pɔk | I | kaʃidan | C | partɔftan | G | bastan | G |
| **T-Nimich 2** | qapidan | F | ʤoqidan | J | ʃʉstan | B | tɔza | L | kaʃidan | C | partɔftan | G | bastan | G |
| **T-Nimich 3** | qapidan | F | ʧqidan | J | ʃʉstan | B | tɔza | L |  |  | partɔftan | G | bastan | G |
| **T-Nimich 4** | qapidan | F | ʤəqidan | J | ʃuʃtan | B | pɔk | I | kaʃidan | C | partɔftan | G | bastan | G |
| **T-Novmetan 1** | dast | E | paʃ[[27]](#footnote-28) | E | ʃʉʃtan | B | pok | I | kaʃidan | C | avɔ | H | bastan | G |
| **T-Novmetan 2** | dast | E | qɪs | A | ʃʉʃtan | B | pɔk | I | kaʃidan | C | haβɔ | H | bastan | G |
| **T-Nûshor 1** | qapidan | F | ʤəqidan | J | ʃʉstan | B | ruftan | K | drɔz | E | partɔftan | G | bastan | G |
| **T-Nûshor 2** | qapidan | F | ʤapidan | J | ʃʉjdan | C | ruftan | K | kaʃidan | C | partɔftan | G |  |  |
| **T-Nûshor 3** | qapidan | F | xɔjdan[[28]](#footnote-29) | K | ʃuwidan | C | tɔza | L | kaʃidan | C | partɔftan | G | bastan | G |
| **T-Rishtan 1** | qabidan | F | sxmiʃ | C | ʃystan | B | pɔk | I | kaʃidan | C | ɣɔrʊndan | I | bastan | G |
| **T-Rishtan 2** | qapidan | F | qapidan | L | ʃuʃtan | B | pɔk | I | ʒʒim | F | ɣirɣɔndan | I | bastan | G |
| **T-Rishtan 3** | qapidan | F | zʲer[[29]](#footnote-30) | M | ʃyʃtan | B | pɔk | I | kaʃidan | C | partoftan | G | bastan | G |
| **T-Shink 1** | dɔʃtan | E | maʤaq[[30]](#footnote-31) | J | ʃʉʃtan | B | pɔk | I | kəʃidan | C | partoftan | G | bastan | G |
| **T-Shink 2** | qapidan | F | zer | M | ʃʉʃtan | B | tɔza | L | kaʃidan | C | partoftan | G | bastan | G |
| **T-Shink 3** | dɔʃtan | E | ʃʉrdan | N | ʃʉstan | B | pɔk | I | kaʃidan | C | partoftan | G | bastan | G |
| **T-Urmetan 1** | dɔʃtan | E |  |  | ʃʉʃtan | B | tɔza | L | kaʃidan | C | partoftan | G | bastan | G |
| **T-Urmetan 2** | dɔʃtan | E | qapidan | L | ʃʉʃtan | B | tɔza | L | kaʃidan | C | partoftan | G | uzʲel | L |
| **T-Urmetan 3** | dɔʃtan | E | zer | M | ʃəʃtan | B | tɔzə | L | kaʃidan | C | partoftan | G | alɔka | M |
| **T-Urmetan 4** | dɔʃtan | E | zer | M | ʃʃtan | B | tɔza | L | kaʃidan | C | partoftan | G | bastan | G |
| **T-Zarmanak 1** | dast | E | qis | A | ʃʉʃtan | B | pɔk | I | kaʃidan | C | hawɔ | H | bastan | G |
| **T-Zarmanak 2** | dast | E | qis | A | ʃʉʃtan | B | pɔk | I | kaʃidan | C | hawɔ | H | bastan | G |
| **Y-Dugova 1** | ʧaki | G | likat | P | asinojim | D | arantim | M | axaʃim | C | apartovimʃ | G | avantimʃ | N |
| **Y-Dugova 2** | ʧaki | G | muʃti | Q | sinɔjak | D | tɔzai | L | xaʃak | C | partovak | G | vantak | N |
| **Y-Safedorak 1** | ʧaki | G | ɣiʒimak[[31]](#footnote-32) | R | sinojak | D | tɔzai | L | xaʃak | C | partovak | G | kaʃoli | O |
| **Y-Safedorak 2** | ʧaki | G | ʧʊvak | S | sinojak | D | rantak | M | xaʃak | C | partovak | G | βantak | N |
| **Y-Safedorak 3** |  |  |  |  |  |  |  |  |  |  |  |  |  |  |

| **Informant** | **to sew** | | **to say** | | **to sing** | | **to play** | | **to freeze** | | **sun** | | **moon** | |
| --- | --- | --- | --- | --- | --- | --- | --- | --- | --- | --- | --- | --- | --- | --- |
| **Ka-Gazli 1** | tegu | A | ajtu | A | ɣulʲe | A | wɔjnaw | A | tɔŋu | A | kʉn | A | aj | A |
| **Ka-Gazli 2** | tegu | A | søjlu | B | ajtu | B | ɔjnaw | A | toŋu | A | kʉn | A | aj | A |
| **Ka-Gazli 3** | tɪgu | A | ajtu | A | wøle | A | wɔjnaw | A | toŋu | A | kʉn | A | aj | A |
| **Ka-Gazli 4** | tɪgu | A | søjlu | B | ɛn | C | wɔjnaw | A | toŋu | A | kʉn | A | aj | A |
| **Ka-Gazli 5** | tegu | A | søjlew | B | æŋ | C | wɔjnaw | A | toŋu | A | kʉn | A | aj | A |
| **Ka-Gazli 6** | tɪgu | A | søjlʊ | B | wølim | A | ɔjnaw | A | toŋu | A | kʉn | A | aj | A |
| **Ka-Gazli 7** | tɪgu | A | søjlʊ | B | wølim | A | ɔjnaw | A | toŋu | A | kʉn | A | aj | A |
| **Ka-Raushan 1** | tɪgʊː | A | søjlʊː | B | ɛn | C | ɔjnɔʊ | A | qatərʊː | B | kʉn | A | aj | A |
| **Ka-Raushan 2** | tɨgʊː | A | søjlʊː | B | ɛn | C | ʊjnɔː | A | tɔŋʊː | A | kʉn | A | aj | A |
| **Ka-Raushan 3** | tɨgʊː | A | søjlʊː | B | ɛn | C | wɔjnaʊ | A | tɔŋʊː | A | kʉn | A | aj | A |
| **Ka-Raushan 4** | tɨgʊː | A | søjleʊ | B | qɔsəʁ | D | wɔjnaʊ | A | tɔŋʊː | A | kʉn | A | aj | A |
| **Ki-Akmuz 1** | tiɣyː | A | syjløː | B | ɨrdɔː | E | ɔjnɔː | A | tɔŋu | A | kyn | A | aj | A |
| **Ki-Akmuz 2** | tiɣyː | A | syjløː | B | ɨrdɔː | E | ɔjnɔː | A | yʃyː | C | gyn | A | aj | A |
| **Ki-Akmuz 3** | tiɣyː | A | syjløː | B | ɨrdɔː | E | ɔjnɔː | A | yʃyː | C | gyn | A | aj | A |
| **Ki-Barskoon** | tig˳ | A | syjløː | B | ɨrdɔː | E | ɔjnɔː | A | ʉʃʉː | C | kyn | A | aj | A |
| **Ki-Kulanak 1** | tiɣyː | A | ajtuː | A | ɨrdɔː | E | ɔjnɔː | A | yʃyː | C | gyn | A | aj | A |
| **Ki-Kulanak 2** | tigyː | A | syjløː | B | ɨrdɔː | E | ɔjnɔː | A | tɔŋuː | A | gyn | A | aj | A |
| **Ki-Kulanak 3** | tik | A | syjløː | B | ɨrdɒw | E | ɔjnɔː | A | tɔŋuː | A | gyn | A | aj | A |
| **Ki-Kulanak 4** | tiɣyː | A | ajtuː | A | ɨrdɔː | E | ɔjnɔː | A | tɔŋuː | A | kyn | A | aj | A |
| **Ki-Kulanak 5** | tigʊː | A | syjløː | B | ɨrdɔː | E | ɔjnɔː | A | tɔŋuː | A | gyn | A | aj | A |
| **Ki-Orday 1** | tigʊː | A | sijløʃ | B | ɨrdaʃ | E | ɔjnɐʃ | A | yʃɪʃ | C | gyn | A | ɒj | A |
| **Ki-Orday 2** | tigɛm | A | syløɪm | B | ɨrdaɪm | E | ɔjnøɪm | A | tɔŋɨjt | A | gyn | A | ɒj | A |
| **Ki-Orday 3** | tigɛt | A | syløjt | B | ɨrdaɪt | E | ɔjnaɪt | A | ysyt | C | gyn | A | ɒj | A |
| **Ki-Orday 4** |  |  | syløw | B | ɨrdoː | E | biløː | B | tɔŋʊː | A | kyn | A | aj | A |
| **Ki-Tamga** | tiɣyː | A | syjløː | B | ɨrdɔː | E | ɔjnɔː | A | yʃyː | C | kyn | A | aj | A |
| **KK-Halqabad 1** | tɨgʊː | A | syjløp | B | qɔsəʁ | D | wɔjnaʊ | A | tɔŋʊː | A | kʉn | A | aj | A |
| **KK-Halqabad 2** | tɨgʊː | A | ajtʊ | A | qɔsəʁ | D | wɔjnaʊ | A | tɔŋʊː | A | qʉjaʃ | B | aj | A |
| **KK-Halqabad 3** | tɨgʊː | A | søjlʊ | B | qɔsq | D | wɔjnaʊ | A | tɔŋʊː | A | kʉn | A | aj | A |
| **KK-Kokdarya 1** | tɨgʊː | A | sɨjlʊː | B | qɔsɜq | D | wɔjnaʊ | A | tɔŋʊː | A | qʉjaʃ | B | aj | A |
| **KK-Kokdarya 2** | tɨgʊ | A | søjlʊː | B | qɔsɜq | D | ɔjnaʊ | A | tɔŋʊː | A | kyn | A | aj | A |
| **KK-Kokdarya 3** | tɨgʊ | A | sɨjlʊː | B | qɔsəʁ | D | wɔjnaʊ | A | tɔŋʊː | A | qʉjaʃ | B | aj | A |
| **KK-Kokdarya 4** | tɪgʊː | A | søjlʊː | B | qʊsəʁ | D | ɔjnaʊ | A | tɔŋʊː | A | kʉn | A | aj | A |
| **KK-Shege 1** | tɨgʊː | A | søjlʊː | B | qɔsə | D | wɔjnaʊ | A | tɔŋʊː | A | kʉn | A | aj | A |
| **KK-Shege 2** | tɨgʊː | A | søjlʊː | B | qɔsə | D | wɔjnaʊ | A | tɔŋʊː | A | kʉn | A | aj | A |
| **KK-Shege 3** | tɨgʊː | A | søjlʊː | B | qɔsəʁ | D | wɔjnaʊ | A | tɔŋʊː | A | kʉn | A | aj | A |
| **KK-Shege 4** | tɨgʊː | A | søjlʊː | B | qɔsəʁ | D | wɔjnaʊ | A | tɔŋʊː | A | qʉjaʃ | B | aj | A |
| **U-Hitoy 1** | tɨgʊː | A | søzlʊː | B | qɔsəʁ | D | wɔjnaʊ | A | tɔŋʊː | A | qʉjaʃ | B | aj | A |
| **U-Hitoy 2** | tɨgʊː | A | søjlʲʊ | B | qɔʃəq | D | wɔjnɔʊ | A | tɔŋʊː | A | qʉjaʃ | B | aj | A |
| **U-Hitoy 3** | tɨgʊː | A | søzlʊː | B | qɔsəq | D | wɔjnaʊ | A | tɔŋʊː | A | kʉn | A | aj | A |
| **U-Novmetan 3** | tɪkiʃ | A | gapɪrgin[[32]](#footnote-33) | C | kyjla | F | ʉjna | A | sauq | D | qujɔʃ | B | ɔj | A |
| **U-Soy Mahalla 1** | tikmɔq | A | gaplaʃiʃ[[33]](#footnote-34) | C | aʃʉla | G | ʉjnamɔq | A | sɔβʊq | D | qujɒʃ | B | ɒj | A |
| **U-Soy Mahalla 2** | tikmɔq | A | gapɪrmɔq | C | aʃula | G | ɔjnamɔq | A | muzlamɔq | E | qujɔʃ | B | wɔj | A |
| **U-Soy Mahalla 3** | tikiʃ | A | gapɨrɪʃ | C | aʃula | G | ojnaʃ | A | sɔβʊq | D | qujɔʃ | B | ɔj | A |
| **U-Urtoqqishloq 1** | tɪkiʃ | A | gapɨrmɔq | C | aʃʊla | G | ɔjnamɔq | A | sɔqɔtɪʃ | F | qujɔʃ | B | ɔj | A |
| **U-Urtoqqishloq 2** | tikmɔq | A | ajtmɔq | A | xʊʃʊk | H |  |  | mʊzlamɔq | E | qujɔʃ | B | ɔj | A |
| **U-Urtoqqishloq 3** | tikiʃ | A | gapərmɔq | C | aʃʊla | G | ɔjnamɔq | A | mʊzlamɔq | E | qujɔʃ | B | ɔj | A |
| **U-Urtoqqishloq 4** | tikmɔq | A | gapərmɔq | C | kʉjlamɔq | F | ɔjnamɔq | A | mʊzlamɔq | E | qyjaʃ | B | ɔj | A |
| **U-Zarmanak 3** | tikiʃ | A | gapərmɔq | C | aʃula | G | ʉjnamɔq | A | muzlamɔq | E | qujɔʃ | B | ɔj | A |
| **U-Zarmanak 4** | tikmɔq | A | gapərmɔq | C | aʃula | G | ʉjnamɔq | A | sɔvuq | D | qujɔʃ | B | ɔj | A |
| **T-Agalyk** | duxtan | D | guftan | G | sarɔjidan | P | bɔzi | C | xunuk | I | ɔftɔb̥ | C | mɔh | B |
| **T-Kamangaron 1** | døxtan | D | gaf | G | aʃula | G | bɔzi | C | jax | J | ɔftɔb̥ | C | mah | B |
| **T-Kamangaron 2** | døxtan | D | guftan | G | aʃulə | G | bɔzi | C | xunuk | I | ɔftɔb̥ | C | mɔh | B |
| **T-Kamangaron 3** |  |  | guftan | G | xɔndan | M | bɔzi | C | xunuk | I | ɔftɔb̥ | C | mahtɔv̥ | C |
| **T-Kamangaron 4** | døxtan | D | gap | G | aʃula | G | bɔzi | C | xunuk | I | ɔftɔp | C | mah | B |
| **T-Kaptarhona 1** | duxtan | D | guftan | G | aʃula | G | bɔzi | C | jax | J | aftaw | C | moh | B |
| **T-Kaptarhona 2** | dʊxtan | D | gab | G | aʃula | G | bozi | C | xunuk | I | oftɔb | C | mɔhtɔb | C |
| **T-Kaptarhona 3** | mʲeduzram | D | gab | G | aʃula | G | bozi | C | xanək | I | aftɒb | C | mahtɒb | C |
| **T-Kaptarhona 4** | duxtan | D | gaf | G | aʃula | G | bɔzi | C | xənək | I | aftaw | C | mahtɔw | C |
| **T-Kaptarhona 5** | duxtan | D | gaf | G | aʃula | G | bɔzi | C | xnək | I | aftaw | C | maftɔw | C |
| **T-Navdî 1** | duxtan | D | guftan | G | hɔfizi | N | bozi | C | xunuk | I | ɔftob̥ | C | mɔhtɔb̥ | C |
| **T-Navdî 2** | duxtan | D | guftan | G | hɔfizi | N | bozi | C | xunuk | I | ɔftɔb̥ | C | mɔhtɔb̥ | C |
| **T-Navdî 3** | duxtan | D | gafzan | G | xɔndan | M | bɔzi | C | xunuk | I | ɔftɔb̥ | C | mahtɔb | C |
| **T-Nimich 1** | duxtan | D | guftan | G | hɔfizi | N | bɔzi | C | xunuk | I | ɔftɔb̥ | C | mɔhtɔb̥ | C |
| **T-Nimich 2** | duxtan | D | gap | G | hɔfizi | N | bɔzi | C | jax | J | ɔftɔb̥ | C | mɔhtɔb | C |
| **T-Nimich 3** | duxtan | D | guftan | G | bajt[[34]](#footnote-35) | O | bɔzi | C | xənək | I | aftɔw | C | mahtɔw | C |
| **T-Nimich 4** | duxtan | D | guftan | G | hɔfizi | N | bɔzi | C | xənək | I | aftɔw | C | mahtɔw | C |
| **T-Novmetan 1** | dʉxtan | D | gap | G |  |  | bɔzi | C | xunuk | I | ɔftɔb̥ | C | ma | B |
| **T-Novmetan 2** |  |  | gap | G |  |  | bɔzi | C | xunuk | I | ɔftɔb̥ | C | ma | B |
| **T-Nûshor 1** | duxtan | D | guftan | G | hɔfizi | N | bɔzi | C | xənək | I | aftow | C | mahtɔw | C |
| **T-Nûshor 2** | duxtan | D | guftan | G | xɔndan | M | bɔzi | C | xʊnʊk | I | ɔftɔb̥ | C | mahtɔb | C |
| **T-Nûshor 3** | duxtan | D | gap | G | hɔfizi | N | bɔzi | C | xnək | I | aftow | C | mahtɔw | C |
| **T-Rishtan 1** | duxtan | D | gav | G |  |  | bɔzi | C | xunuk | I | oftɔp | C | mɔh | B |
| **T-Rishtan 2** | duxtan | D | gap | G | aʃula | G | bɔzi | C | xunuk | I | ɔftɔb̥ | C | mɔh | B |
| **T-Rishtan 3** | dʊxtan | D | gap | G | aʃulə | G | bɔzi | C | xunik | I | ɔftɔb̥ | C | mɔh | B |
| **T-Shink 1** | dʊxtan | D | gaf | G | ʃer[[35]](#footnote-36) | P | bɔzi | C | xunuk | I | ɔftɔb̥ | C | mɔhtɔb | C |
| **T-Shink 2** | dʊxtan | D | gʊftan | G | ʃer | P | bɔzi | C | xunuk | I | ɔftɔb̥ | C | mɔhtɔb | C |
| **T-Shink 3** | dʊxtan | D | gʊftan | G | sʉrʉd̥ | P | bɔzi | C | xunuk | I | ɔftɔb̥ | C | mɔh | B |
| **T-Urmetan 1** | dʊxtan | D | guftan | G | aʃula | G | bɔzi | C | xunuk | I | ɔftɔb̥ | C | mɔh | B |
| **T-Urmetan 2** | duxtan | D | guftan | G | xɔndan | M | bɔzi | C | xunuk | I | ɔftɔb̥ | C | mahtɔb | C |
| **T-Urmetan 3** | duxtan | D | guftan | G | ʃərʉdan | P | bɔzi | C | xənək | I | ɔftɔb̥ | C | mahtɔb̥ | C |
| **T-Urmetan 4** | duxtan | D | guftan | G | ʃer | P | bɔzi | C | xənək | I | ɔftɔb̥ | C | mahtɔb | C |
| **T-Zarmanak 1** | dʉxtan | D | guftan | G | xɔndan | M | bɔzi | C | xunuk | I | oftob̥ | C | ma | B |
| **T-Zarmanak 2** | dʉxtan | D | gap | G | xɔndan | M | bɔzi | C | xunuk | I | oftob | C | maː | B |
| **Y-Dugova 1** | aʃijimʃ | E | gap | G | aʒɔjim | Q | bɔzi | C | ix | J | xir | D | mahtɔb | C |
| **Y-Dugova 2** | ʃijak | E | gap | G | ʒɔjak | Q | bɔzi | C | xʊnʊk | I | xur | D | mahtɔb | C |
| **Y-Safedorak 1** | ʃijak | E | βɔβak | J | ʒɔj | Q | bɔzi | C | xʊnʊk | I | xʉr | D | mɔh | B |
| **Y-Safedorak 2** | ʃijak | E | gapi | G | ʒɔjak | Q | bɔzi | C | xʊnʊk | I | xʊr | D | mɔh | B |
| **Y-Safedorak 3** |  |  |  |  |  |  |  |  |  |  |  |  |  |  |

| **Informant** | **star** | | **water** | | **rain** | | **river** | | **lake** | | **sea** | | **salt** | | **stone** | | **sand** | |
| --- | --- | --- | --- | --- | --- | --- | --- | --- | --- | --- | --- | --- | --- | --- | --- | --- | --- | --- |
| **Ka-Gazli 1** | ʒɔldəz̥ | A | suː | A | ʒaŋbɨr | A | wøzʲen | A | tʲeŋɨz̥ | A | kʉł | A | tʉz̥ | A | tas | A | qum | A |
| **Ka-Gazli 2** | ʒʉldʊz̥ | A | suː | A | ʒaŋbɨr | A | darja | B | kwøl | B | dʲeŋɪz̥ | B | tʊz̥ | A | tas | A | qum | A |
| **Ka-Gazli 3** | ʒʊldʊz̥ | A | suː | A | ʒaŋbər | A | bəlaq | C | kwøl | B | tʲeŋɪz̥ | B | tuz̥ | A | tas | A | qum | A |
| **Ka-Gazli 4** | ʒʊldəz̥ | A | suː | A | ʒaŋbɨr | A | wøzʲen | A | kwøł | B | tʲeŋɪz̥ | B | duz̥ | A | tas | A | qum | A |
| **Ka-Gazli 5** | ʒʉldəz̥ | A | sʊː | A | ʒaŋbər | A | wøzʲen | A | kwʊł | B | tʲeŋɪz̥ | B | duz̥ | A | tas | A | qum | A |
| **Ka-Gazli 6** | ʒʉldəz̥ | A | suː | A | ʒaŋbər | A | wøzʲen | A | kwøł | B | tʲeŋɪz̥ | B | tuz̥ | A | tas | A | qum | A |
| **Ka-Gazli 7** | ʒʉldəz̥ | A | suː | A | ʒaŋbər | A | kʉł | D |  |  | tʲeŋɪz̥ | B | tuz̥ | A | tas | A | qum | A |
| **Ka-Raushan 1** | ʒʉldɨz̥ | A | sʊː | A | ʒawɨn | B | darja | B | kwøl | B | tʲeŋiz̥ | B | dʊz | A | tas | A | qʊm | A |
| **Ka-Raushan 2** | ʒyldʉz̥ | A | sʊː | A | ʒaŋɣɨr | A | wøzʲen | A | kwøl | B | tʲeŋiz | B | tuz | A | tas | A | qʊm | A |
| **Ka-Raushan 3** | ʒʉldɨz̥ | A | sʊː | A | ʒaŋbɨr | A | wøzʲɛn | A | kwøl | B | tʲeŋiz̥ | B | tʉz | A | tas | A | qʊm | A |
| **Ka-Raushan 4** | ʒʉldɨz̥ | A | sʊː | A | ʒaŋbɨr | A | wøzʲɛn | A | kwøl | B | tʲeŋiz̥ | B | tʉz̥ | A | tas | A | qʊm | A |
| **Ki-Akmuz 1** | ʤɨldɨz̥ | A | suː | A | ʤaːn | B | darja | B | køl | B | deŋiz̥ | B | tus | A | taʃ | A | qum | A |
| **Ki-Akmuz 2** | ʤɨldɨz̥ | A | suː | A | ʤaːn | B | suː | E | gøl | B | deŋiz̥ | B | tus | A | taʃ | A | qum | A |
| **Ki-Akmuz 3** | ʤɨldɨz̥ | A | suː | A | ʤaːn | B | darja | B | gøl | B | deŋiz̥ | B | tus | A | taʃ | A | qum | A |
| **Ki-Barskoon** | ʤɨldɨz̥ | A | suː | A | ʤaːn | B | darja | B | køl | B | deŋiz̥ | B | tuz̥ | A | tas | A | qum | A |
| **Ki-Kulanak 1** | ʤɨldɨz̥ | A | suː | A | ʤamgɨr | A | suː | E | køl | B | deŋiz̥ | B | tuz̥ | A | taʃ | A | qʊm | A |
| **Ki-Kulanak 2** | ʤɨldɨz̥ | A | suː | A | ʤaːn | B | darja | B | gøl | B | dʲeŋiz̥ | B | tuz̥ | A | taʃ | A | qum | A |
| **Ki-Kulanak 3** | ʤɨldɨz̥ | A | suː | A | ʤaːn | B | darja | B | gøl | B | dʲeŋiz̥ | B | tus | A | taʃ | A | qum | A |
| **Ki-Kulanak 4** | ʤɨldɨz̥ | A | suː | A | ʤamɣɨr | A | darja | B | køl | B | deŋiz̥ | B | tus | A | tas | A | qum | A |
| **Ki-Kulanak 5** | ʤɨldɨz̥ | A | suː | A | ʤaːn | B | darja | B | gøl | B | deŋiz̥ | B | tuz | A | taʃ | A | qum | A |
| **Ki-Orday 1** | ʒɨldɨz̥ | A | sʊː | A | ʤaŋgɨr | A | darja | B | kʲøl | B | dɛŋɪs | B | tuz̥ | A | taʃ | A | qum | A |
| **Ki-Orday 2** | ʒɨldəz̥ | A | sʊː | A | ʤamgɨr | A | sɒj | F | køl | B | dʲeŋɪs | B | tus | A | taʃ | A | qum | A |
| **Ki-Orday 3** | ʤɨldɨz̥ | A | sʊː | A | ʤamɣɨr | A | sɒj | F | hawz | C | dʲeŋɪz̥ | B | tʉs | A | taʃ | A | qum | A |
| **Ki-Orday 4** | ʤɨldɨz̥ | A | sʊː | A | ʤamgɨʃ | A | sɒj | F | darɨja | D | dʲeŋɪs | B | tuz | A | tɔʃ | A | qum | A |
| **Ki-Tamga** | ʤɨldɨz̥ | A | suː | A | ʤaːn | B | arɨk | G | køl | B | dɛŋiz̥ | B | tuz̥ | A | taʃ | A | qum | A |
| **KK-Halqabad 1** | ʒʉldɨz̥ | A | sʊː | A | ʒamɣɨr | A | darja | B | kwøl | B | tʲeŋiz̥ | B | dʉz̥ | A | tas | A | qʊm | A |
| **KK-Halqabad 2** | ʒʉldɨz̥ | A | sʊː | A | ʒawɔn | B | darja | B | kwøl | B | tʲeŋiz̥ | B | dʉz̥ | A | tas | A | qʊm | A |
| **KK-Halqabad 3** | ʒʉldɨz̥ | A | sʊː | A | ʒawɔn | B | darja | B | kwøl | B | tʲeŋiz̥ | B | dʉz̥ | A | tas | A | qʊm | A |
| **KK-Kokdarya 1** | ʒɨldɨz̥ | A | sʊː | A | ʤamɣɨr | A | ʤap | H | kwøl | B | tarja | C | tus | A | tas | A | qʊm | A |
| **KK-Kokdarya 2** | ʒɨldɨz̥ | A | sʊ | A | ʒawɨn | B | tarja | B | kwøl | B | tʲeŋɨz̥ | B | tʉs | A | tas | A | qʊm | A |
| **KK-Kokdarya 3** | ʒɨldɨz̥ | A | sʊː | A | ʒamɣɨr | A | tarja | B | kwøl | B | tʲeŋɨz̥ | B | tʊs | A | tas | A | qʊm | A |
| **KK-Kokdarya 4** | ʒɨldɨz̥ | A | sʊː | A | ʒawɨn | B | darja | B | kwøl | B | tʲeŋɨz̥ | B | tuz̥ | A | tas | A | qʊm | A |
| **KK-Shege 1** | ʒʊldɨz̥ | A | sʊː | A | ʒawɔn | B | darja | B | kwøl | B | tʲeŋiz̥ | B | dʊz̥ | A | tas | A | qʊm | A |
| **KK-Shege 2** | ʒɨldɨz̥ | A | sʊː | A | ʒawɔn | B | tarja | B | kwøl | B | tʲeŋiz̥ | B | dʊz̥ | A | tas | A | qʊm | A |
| **KK-Shege 3** | ʒ˳ɨldɨz̥ | A | sʊː | A | ʒ˳awɔn | B | d̥arja | B | kwøl | B | tʲeŋiz̥ | B | d̥ʊz̥ | A | tas | A | qʊm | A |
| **KK-Shege 4** | ʃʉldɨz̥ | A | sʊː | A | ʒamgɨr | A | darja | B | kwøl | B | tʲeŋiz̥ | B | dʉz̥ | A | tas | A | qʊm | A |
| **U-Hitoy 1** | juldɨz̥ | A | sʊː | A | ʤawon | B | ʤap | H | kwøl | B | dʲeŋiz̥ | B | tuz̥ | A | taʃ | A | qʊm | A |
| **U-Hitoy 2** | ʤʉldɨz̥ | A | sʊː | A | ʤawon | B | darja | B | kwøl | B | dʲeŋiz̥ | B | tʉz̥ | A | taʃ | A | qʊm | A |
| **U-Hitoy 3** | ʤuldɨz̥ | A | sʊː | A | ʤawɔn | B | darja | B | kwøl | B | tʲeŋiz̥ | B | tʉz̥ | A | taʃ | A | qʊm | A |
| **U-Novmetan 3** | juldyz̥ | A | suβ | A | jɔmɣər | A | darjɔ | B |  |  | darjɔ | C | tuz̥ | A | tɔʃ | A | qʊm | A |
| **U-Soy Mahalla 1** | julduz̥ | A | suw | A | jɔmɣɪr | A | darjɔ | B | kʉl | B | dʲeŋiz̥ | B | tʊz̥ | A | tɔʃ | A | qum | A |
| **U-Soy Mahalla 2** | juldɨz̥ | A | sʊw | A | jɔmgɜr | A | darjɔ | B | køl | B | dʲeŋɪs | B | tuz̥ | A | tɔs | A | qum | A |
| **U-Soy Mahalla 3** | julduz̥ | A | sʊw | A | jɔmgɜr | A | darjɔ | B | køl | B | dʲeŋɪs | B | tus | A | tɔs | A | qʊm | A |
| **U-Urtoqqishloq 1** | juldʊz̥ | A | suw | A | jɔmɣɪr | A | darjɔ | B | kwʉł | B | deŋiz̥ | B | tus | A | tɔʃ | A | tuprɔk[[36]](#footnote-37) | B |
| **U-Urtoqqishloq 2** | juldʊz̥ | A | suw | A | jɔmɣər | A | darjɒ | B | kwøł | B | deŋiz̥ | B | tus | A | tɒʃ | A | qʊm | A |
| **U-Urtoqqishloq 3** | juldʊz̥ | A | suw | A | jɔmɣər | A | darjɔ | B | kwʉł | B | deŋiz̥ | B | tus | A | tɔʃ | A | qʊm | A |
| **U-Urtoqqishloq 4** | juldyz̥ | A | suw | A | jɔmɣər | A | dajrɒ | B | kwʉł | B | deŋiz̥ | B | tʉz | A | tɔʃ | A | qʊm | A |
| **U-Zarmanak 3** | julduz̥ | A | suβ | A | jɔmɣɪr | A | darjɔ | B | kʉl | B | deŋiz̥ | B | tuz | A | tɔʃ | A | qum | A |
| **U-Zarmanak 4** | julduz̥ | A | suβ | A | jɔmɣər | A | darjɔ | B | kʉl | B | darjɔ | C | tuz̥ | A | tɔʃ | A | qum | A |
| **T-Agalyk** | sitɔra | B | ɔb̥ | B | bɔrɔn | D | darjɔ | B | kul | B | bahar | E | namak | B | saŋ | B | xum | A |
| **T-Kamangaron 1** | stɔra | B | ob̥ | B | bɔrɔn | D | darjɔ | B | køl | B | bahar | E | namak | B | sãŋ | B | kum | A |
| **T-Kamangaron 2** | stɔra | B | ɔb̥ | B | bɔrɔn | D | ʤɔj | K | køl | B | bahar | E | namak | B | saŋ | B | kum | A |
| **T-Kamangaron 3** | stɔra | B | ɔb̥ | B | bʊrʊn | D | ʤɔj | K | køl | B | darjɔ | C | namak | B | saŋ | B | kumʧa | A |
| **T-Kamangaron 4** | stɔra | B | ɔb̥ | B | bɔrɔn | D | darjɔ | B |  |  | bahar | E | namak | B | saŋ | B |  |  |
| **T-Kaptarhona 1** | istora | B | aw | B | bɔrun | D | darjɔ | B | kʊl | B | deŋiz̥ | B | namak | B | saŋ | B | qøm | A |
| **T-Kaptarhona 2** | istora | B | ɔb | B | bɔrʊn | D | darjɔ | B | kul | B | dzingɨz | B | namak | B | saŋ | B | qum | A |
| **T-Kaptarhona 3** | istora | B | aw | B | bɔrʊn | D | kanal | L | kul | B | darjɔ | C | namak | B | saŋ | B | kʊm | A |
| **T-Kaptarhona 4** | istora | B | aw | B | bɔrun | D | darjɔ | B | kul | B | dingɨz̥ | B | namak | B | sæŋ | B | qøm | A |
| **T-Kaptarhona 5** | istora | B | aɔ | B | bɔrun | D | darjɔ | B | kul | B | kul | A | namak | B | saŋ | B | qm̩ | A |
| **T-Navdî 1** | sitora | B | ɔb̥ | B | bɔrɔn | D | darjɔ | B | kul | B | bahr | E | namak | B | saŋ | B | rek | D |
| **T-Navdî 2** | sitora | B | ɔp | B | bɔrɔn | D | darjɔ | B | kul | B | bahr | E | namak | B | saŋ | B | rʲek | D |
| **T-Navdî 3** | sitora | B | ɔb̥ | B | bɔrɔn | D | dajrɔ | B | havz | C | bahar | E | namak | B | saŋ | B | rek | D |
| **T-Nimich 1** | sitora | B | ɔb̥ | B | bɔrɔn | D | darjɔ | B | havz | C | bahar | E | namak | B | saŋ | B | qʊm | A |
| **T-Nimich 2** | sitora | B | ɔb | B | bɔrɔn | D | darjɔ | B | hawz | C | bahar | E | namak | B | saŋ | B | rʲeg | D |
| **T-Nimich 3** | sitora | B | ɔβ | B | bɔrɔn | D | darjɔ | B | khul | B | bahar | E | namak | B | saŋ | B | qɜm | A |
| **T-Nimich 4** | sitora | B | ɔβ | B | bɔrʊn | D | darjɔ | B | kul | B | bahar | E | nəmək | B | saŋ | B | qɜm | A |
| **T-Novmetan 1** | stɔra | B | ɔb̥ | B | bɔrɔn | D | ʤʉj | K | hawz̥ | C | darjɔ | C | namak | B | saŋ˳ | B | reg˳ | D |
| **T-Novmetan 2** | stɔra | B | ɔb̥ | B | bɔrɔn | D | ʤʉj | K | hawz | C | d̥arjɔ | C | namak | B | saŋ | B | reg | D |
| **T-Nûshor 1** | sitora | B | ɔw | B | bɔrʊn | D | darjɔ | B | hawz | C | bahɐr | E | namak | B | saŋ | B | rʲeg˳ | D |
| **T-Nûshor 2** | sitora | B | ɔw | B | bɔrɔn | D | darjɔ | B | khul | B | bahar | E | namak | B | saŋ | B | xɔq | E |
| **T-Nûshor 3** | sitora | B | ɔw | B | bɔrʊn | D | darjɔ | B | hawz | C | bahɐr | E | nəmək | B | saŋ | B | qm̩ | A |
| **T-Rishtan 1** | sitora | B | ob̥ | B | bɔrɔn | D | darjɔ | B | kul | B | bahar | E | namak | B | saŋ | B | reg˳ | D |
| **T-Rishtan 2** | jɨldɨz̥ | A | ob̥ | B | bɔrɔn | D | darjɔ | B | kul | B | bahər | E | namak | B | saŋ | B | reg˳ | D |
| **T-Rishtan 3** | sitɔra | B | ob̥ | B | bɔrɔn | D | darjɔ | B | kul | B | bahər | E | namak | B | saŋ | B | reg˳ | D |
| **T-Shink 1** | stɔra | B | ɔb̥ | B | bɔrɔn | D | darjɔ | B | kʊl | B | bahr | E | namak | B | saŋ | B | qʊm | A |
| **T-Shink 2** | sɪtɔra | B | ɔb̥ | B | bɔrɔn | D | darjɔ | B | kul | B | bahar | E | namak | B | saŋ | B | qʊm | A |
| **T-Shink 3** | stɔra | B | ɔw | B | bɔrɔn | D | darjɔ | B | kul | B | bahr | E | namak | B | saŋ | B | qʊm | A |
| **T-Urmetan 1** | sɪtɔra | B | ɔb̥ | B | bɔrɔn | D | darjɔ | B | kul | B | bahr | E | namak | B | saŋ | B | xɔk | E |
| **T-Urmetan 2** | stɔra | B | ɔb | B | bɔrɔn | D | darjɔ | B | kul | B | bahr | E | namak | B | saŋ | B | qʊm | A |
| **T-Urmetan 3** | sɪtɔra | B | ɔb̥ | B | bɔrʊn | D | darjɔ | B | kul | B | bahr | E | namak | B | saŋ | B | qm̩ | A |
| **T-Urmetan 4** | sɪtɔra | B | ɔβ | B | bɔrɔn | D | darjɔ | B | kul | B | kul | A | namak | B | saŋ | B | xɔk | E |
| **T-Zarmanak 1** | stɔra | B | ɔb | B | bɔrɔn | D | dajrɔ | B | kʉl | B | deŋiz̥ | B | namak | B | saŋ | B | xɔk | E |
| **T-Zarmanak 2** | jilduz̥ | A | ɔb̥ | B | bɔrɔn | D | darjɔ | B | kʉl | B | deŋiz̥ | B | namak | B | saŋ | B | xɔk | E |
| **Y-Dugova 1** | stɔra | B | ɔp | B | bɔrʊːn | D | darjɔ | B | ozero | F | bahar | E | namak | B | sang | B | rʲek | D |
| **Y-Dugova 2** | sitɔra | B | ɔp | B | bɔrɔn | D | darjɔ | B | havz | C | havz | F | namak | B | sank | B | qʊm | A |
| **Y-Safedorak 1** | sitɔra | B | ɔp | B | bɔrʊːn | D | dajrɔ | B | hawz | C | bahr | E | namak | B | sank | B | rek | D |
| **Y-Safedorak 2** | stɔra | B | ɔb̥ | B | bɔrʊːn | D | dajrɔ | B | hawz | C | bahr | E | namak | B | sang | B | rʲeg | D |
| **Y-Safedorak 3** |  |  |  |  |  |  |  |  |  |  |  |  |  |  |  |  |  |  |

| **Informant** | **dust** | | **earth** | | **cloud** | | **fog** | | **sky** | | **wind** | | **snow** | | **ice** | |
| --- | --- | --- | --- | --- | --- | --- | --- | --- | --- | --- | --- | --- | --- | --- | --- | --- |
| **Ka-Gazli 1** | ʃaŋ | A | ʒʲɪr | A | bʉlt | A | tʉman | A | aspan | A | ʒʲɪl | A | qar | A | mʉz | A |
| **Ka-Gazli 2** | ʃaŋ | A | ʒʲer | A | bult | A | tuman | A | aspan | A | ʃamał | B | qar | A | mʊz̥ | A |
| **Ka-Gazli 3** | ʃaŋ | A | ʒʲɪr | A | bult | A | tuman | A | aspan | A | ʃamał | B | qar | A | mʊz | A |
| **Ka-Gazli 4** | ʃaŋ | A | ʒʲɪr | A | bʊlt | A | tuman | A | aspan | A | ʃamɒł | B | qar | A | mʊz | A |
| **Ka-Gazli 5** | ʃaŋ | A | ʒʲer | A | bʊlt | A | tuman | A | aspan | A | ʃamał | B | qar | A | mʉz̥ | A |
| **Ka-Gazli 6** | ʃaŋ | A | ʒʲer | A | bʊlt | A | tuman | A | aspan | A | ʒʲɪl | A | qar | A | mʊz̥ | A |
| **Ka-Gazli 7** | ʃaŋ | A | ʒʲɪr | A | bʊlt | A | tuman | A | aspan | A | ʃamɒl | B | qar | A | mʉz̥ | A |
| **Ka-Raushan 1** | ʃaq | A | ʒʲer | A | bʊlt | A | tuman | A | asfan | A | ʒil | A | qar | A | mʉz̥ | A |
| **Ka-Raushan 2** | ʃaŋ | A | ʒɛr | A | bʊlt | A | tuman | A | asfan | A | ʒel | A | qar | A | mʉz̥ | A |
| **Ka-Raushan 3** | ʃaŋ | A | ʒɛr | A | bʊlt | A | tuman | A | aspan | A | ʒɪl | A | qar | A | mʉz̥ | A |
| **Ka-Raushan 4** | ʃaŋ | A | ʒjer | A | bʊlt | A | tuman | A | aspan | A | ʒʲel | A | qar | A | mʊz̥ | A |
| **Ki-Akmuz 1** | ʧaŋ | A | ʤer | A | bulut | A | tuman | A | asman | A | ʃamal | B | qar | A | muz̥ | A |
| **Ki-Akmuz 2** | ʧaŋ | A | ʤer | A | bulut | A | tuman | A | asman | A | ʃamal | B | qar | A | mus | A |
| **Ki-Akmuz 3** | ʧaŋ | A | ʤer | A | bulut | A | tuman | A | asman | A | ʃamal | B | qar | A | muz̥ | A |
| **Ki-Barskoon** | ʧaŋ | A | ʤer | A | bulut | A | tʊman | A | asman | A | ʃamal | B | qar | A | mʊz̥ | A |
| **Ki-Kulanak 1** | caŋ | A | ʤer | A | bulut | A | tʊman | A | asman | A | ʃamal | B | qar | A | muz̥ | A |
| **Ki-Kulanak 2** | ʧaŋ | A | ʤer | A | bulut | A | tʊman | A | asman | A | ʃamal | B | qar | A | muz̥ | A |
| **Ki-Kulanak 3** | ʧaŋ | A | ʤer | A | bulut | A | tʊman | A | asman | A | ʃamal | B | qar | A | mus | A |
| **Ki-Kulanak 4** | ʧaŋ | A | ʤer | A | bulut | A | tʊman | A | asman | A | ʃamal | B | qar | A | muz̥ | A |
| **Ki-Kulanak 5** | ʧaŋ | A | ʤer | A | bulut | A | tʊman | A | asman | A | ʃamal | B | qar | A | muz̥ | A |
| **Ki-Orday 1** | ʧaŋ | A | ʤɛr | A | bulut | A | tuman | A | asmɔn | A | ʃamɒl | B | qɒr | A | muz̥ | A |
| **Ki-Orday 2** | ʧaŋ | A | ʤer | A | bulut | A | tuman | A | asman | A | ʃamal | B | qɒ | A | muz̥ | A |
| **Ki-Orday 3** | ʧaŋ | A | ʤer | A | bulut | A | tuman | A | ɒsmɒn | A | ʃɒmal | B | qɒr | A | muz̥ | A |
| **Ki-Orday 4** | ʧaŋ | A | jɛr | A | bulut | A | tuman | A | ɒsmɒn | A | ʃamal | B | qɒr̯ | A | muz | A |
| **Ki-Tamga** | ʧaŋ | A | ʤer | A | bulut | A | tʊman | A | asman | A | ʃamal | B | qar | A | muz̥ | A |
| **KK-Halqabad 1** | ʃaŋ | A | ʒʲer | A | bʊlt | A | tuman | A | asfan | A | samal | B | qar | A | mʊz̥ | A |
| **KK-Halqabad 2** | ʃaŋ | A | ʒʲer | A | bʊlt | A | tuman | A | aspan | A | samal | B | qar | A | mʊz̥ | A |
| **KK-Halqabad 3** | ʃaŋ | A | ʒʲer | A | bʊlt | A | duman | A | aspan | A | samal | B | qar | A | mʉz̥ | A |
| **KK-Kokdarya 1** | ʃaŋ | A | ʒʲɛr | A | bʊlt | A | tuman | A | asman | A | ʃamal | B | qar | A | mʉz̥ | A |
| **KK-Kokdarya 2** | ʃaŋ | A | ʒʲɛr | A | bʊlt | A | tuman | A | aspan | A | ʃamal | B | qar | A | mʉz̥ | A |
| **KK-Kokdarya 3** | ʧaŋ | A | ʒʲɛr | A | bʊlt | A | tuman | A | asman | A | ʃamal | B | qar | A | mʉz̥ | A |
| **KK-Kokdarya 4** | ʃaŋ | A | ʒʲɪr | A | bʊlt | A | tuman | A | aspan | A | samal | B | qar | A | mʊz | A |
| **KK-Shege 1** | ʃaŋ | A | ʒʲɪr | A | bʊlt | A | duman | A | aspan | A | samal | B | qar | A | mʊz̥ | A |
| **KK-Shege 2** | ʃaŋ | A | ʒʲɪr | A | bʊlt | A | duman | A | asfan | A | samal | B | qar | A | mʊz̥ | A |
| **KK-Shege 3** | ʃaŋ | A | ʒʲer | A | bʊlt | A | duman | A | aspan | A | samal | B | qar | A | mʊz̥ | A |
| **KK-Shege 4** | ʃaŋ | A | ʒʲer | A | bʊlt | A | duman | A | aspan | A | samal | B | qar | A | mʊz̥ | A |
| **U-Hitoy 1** | ʧaŋ | A | ʤʲer | A | bʊlt | A | tuman | A | asman | A | ʃamal | B | qar | A | mʊz̥ | A |
| **U-Hitoy 2** | ʧaŋ | A | ʤʲer | A | bʊlt | A | tuman | A | asman | A | ʃamal | B | qar | A | mʊz̥ | A |
| **U-Hitoy 3** | ʧaŋ | A | ʤʲer | A | bʊlt | A | tuman | A | asman | A | ʃamal | B | qar | A | mʊz̥ | A |
| **U-Novmetan 3** | ʧaŋ | A | jer | A | bulut | A | tuman | A | ɔsmɔn | A | ʃamɔl | B | qɔr | A | jax | B |
| **U-Soy Mahalla 1** | ʧæŋ | A | jɛr | A | bulut | A | tuman | A | ɔsmɔn | A | ʃamɔl | B | qɔr | A | muz̥ | A |
| **U-Soy Mahalla 2** | ʧaŋ | A | jɛr | A | bulut | A | tuman | A | ɔsmɔn | A | ʃamɔl | B | qɔr | A | muz̥ | A |
| **U-Soy Mahalla 3** | ʧaŋ | A | jer | A | bulut | A | tuman | A | ɔsmɔn | A | ʃamɔl | B | qɒr | A | muz̥ | A |
| **U-Urtoqqishloq 1** | ʧaŋ | A | jer | A | bʊlʊt | A | tuman | A | ɔsmɒn | A | ʃamɔl | B | qɔr | A | muz̥ | A |
| **U-Urtoqqishloq 2** | ʧaŋ | A | jer | A | bʊlʊt | A | tuman | A | ɔsmɔn | A | ʃamɔl | B | qɔr | A | muz̥ | A |
| **U-Urtoqqishloq 3** | ʧaŋ | A | jer | A | bʊlʊt | A | tuman | A | ɔsmɔn | A | ʃamɔl | B | qɔr | A | mus | A |
| **U-Urtoqqishloq 4** | ʧaŋ | A | jer | A | bʊlʊt | A | tuman | A | ɔsmɔn | A | ʃamɒl | B | qɔr | A | muz | A |
| **U-Zarmanak 3** | ʧãŋ | A | jɛr | A | bulut | A | tuman | A | ɔsmɔn | A | ʃamɔl | B | qɔr | A | muz | A |
| **U-Zarmanak 4** | ʧaŋ | A | jɛr | A | bulut | A | tuman | A | ɔsmɔn | A | ʃamɔl | B | qɔr | A | muz̥ | A |
| **T-Agalyk** | ʧaŋ | A | zamin | C | abr | C | tuman | A | ɔsmɔn | A | ʃamɔl | B | barf | B | jax | B |
| **T-Kamangaron 1** | ʧaŋ | A | zamin | C |  |  | tuman | A | ɔsmɔn | A | ʃamɔl | B | barf | B | jax | B |
| **T-Kamangaron 2** | ʧaŋ | A | zamin | C | bulut | A | tuman | A | ɔsmɒn | A | ʃamɔl | B | barf | B | jax | B |
| **T-Kamangaron 3** | ʧaŋ | A | zamin | C | bulut | A | tuman | A | ɔsmɔn | A | ʃamɒl | B | barf | B | jax | B |
| **T-Kamangaron 4** |  |  | zamin | C | bulut | A | tuman | A | havɔ | E | ʃamɔl | B |  |  | jax | B |
| **T-Kaptarhona 1** | ʧaŋ | A | zamin | C |  |  | tuman | A | ɔsmon | A | ʃɒmɔl | B | barf | B | jax | B |
| **T-Kaptarhona 2** | ʧaŋ | A | zamin | C | abr | C | tuman | A | ɔsmɔn | A | ʃamɔl | B | barf | B | jax | B |
| **T-Kaptarhona 3** | ʧaŋ | A | zamin | C | bələt | A | tuman | A |  |  | ʃamɔl | B | barf | B |  |  |
| **T-Kaptarhona 4** | ʧæŋ | A | zamin | C | bulut | A | tuman | A | ɔsmʊn | A | ʃamʊl | B | barf | B | jax | B |
| **T-Kaptarhona 5** | ʧæŋ | A | zamin | C | bulut | A | tuman | A | ɔsmun | A | ʃamɔl | B | barf | B | jax | B |
| **T-Navdî 1** | gard̥ | G | zamin | C | abr̩ | C | tuman | A | ɔsmɔn | A | ʃɒmɔl | B | barf | B | jax | B |
| **T-Navdî 2** | gard̥ | G | zamin | C | abr̩ | C | tuman | A | haβɔ | E | ʃamɔl | B | barf | B | jax | B |
| **T-Navdî 3** | ʧaŋ | A | zamin | C | abr̩ | C | tuman | A | haβɔ | E | ʃamɔl | B | barf | B | jax | B |
| **T-Nimich 1** | gard | G | xɔq | D | abr̩ | C | tuman | A | ɔsmɔn | A | ʃamɔl | B | barf | B | jax | B |
| **T-Nimich 2** | ʧaŋ | A | zamin | C | abr̩ | C | tuman | A | ɔsmɔn | A | ʃamɔl | B | barf | B | jax | B |
| **T-Nimich 3** | gard | G | zəmɪn | C | aβr | C | tuman | A | ɔsmɔn | A | ʃamɔl | B | barf | B | jax | B |
| **T-Nimich 4** | gard | G | zəmin | C | avr | C | tuman | A | ɔsmɔn | A | ʃamɔl | B | barf | B | jax | B |
| **T-Novmetan 1** | ʧaŋ˳ | A | zamin | C |  |  | tuman | A | ɔspɔn | A | ʃamɔl | B | barf | B | jax | B |
| **T-Novmetan 2** | ʧaŋ | A | zamin | C | bulut | A | tuman | A | ɔsmɔn | A | samɔl | B | barf | B |  |  |
| **T-Nûshor 1** | gard̥ | G | zəmin | C | abr̩ | C | tuman | A | ɔsmɔn | A | ʃamɔl | B | barf | B | jax | B |
| **T-Nûshor 2** | gard | G | zamin | C | abr̩ | C | tuman | A | ɔsmɔn | A | ʃamɔl | B | barf | B | jax | B |
| **T-Nûshor 3** | gard | G | zmin | C | aβr̩ | C | tuman | A | ɔsmʊn | A | ʃamɔl | B | barf | B | jax | B |
| **T-Rishtan 1** | ʧaŋ | A | zamɪn | C | bʊlʊt | A | tuman | A | ɔsmɔn | A | ʃamɔl | B | barf | B | jax | B |
| **T-Rishtan 2** | ʧæŋ | A | zamin | C | bʊlʊt | A | tuman | A | ɔsmɔn | A | ʃamɔl | B | barf | B | jax | B |
| **T-Rishtan 3** | ʧæŋ | A | zamən | C | abr̩ | C | tuman | A | ɔsmɔn | A | ʃamɔl | B | barf | B | jax | B |
| **T-Shink 1** | ʧaŋ | A | zamin | C | avr̩ | C | tuman | A | ɔsmɔn | A | samɔl | B | barf | B | jax | B |
| **T-Shink 2** | ʧaŋ | A | zamin | C | abr | C | tuman | A | havɔ | E | ʃamɔl | B | barf | B | jax | B |
| **T-Shink 3** | ʧaŋ | A | zamin | C | avr | C | tuman | A | ɔsmɔn | A | ʃamɔl | B | barf | B | jax | B |
| **T-Urmetan 1** | ʧaŋ | A | zamin | C | abr | C | tuman | A | ɔsmɔn | A | ʃamɔl | B | barf | B | jax | B |
| **T-Urmetan 2** | ʧaŋ | A | zamin | C |  |  | tuman | A | ɔsmɔn | A | samɔl | B | barf | B | jax | B |
| **T-Urmetan 3** | ʧaŋ | A | zamin | C | abr | C | tuman | A | ɔsmɔn | A | ʃamɔl | B | barf | B | jax | B |
| **T-Urmetan 4** | ʧaŋ | A | zamin | C | avr | C | tuman | A | ɔsmɔn | A | ʃamɔl | B | barf | B | jax | B |
| **T-Zarmanak 1** | ʧaŋ | A | zamin | C | bulut | A | tuman | A | ɔspɔn | A | ʃamɔl | B | barf | B | jax | B |
| **T-Zarmanak 2** | ʧaŋ | A | zamin | C | bulut | A | tuman | A | ɔsmɔn | A | samɔl | B | barf | B | jax | B |
| **Y-Dugova 1** | ʧang | A | zamin | C | abr | C | tuman | A | ɔsmʊn | A | ʃamɔl | B | barf | B | ex | B |
| **Y-Dugova 2** | ʧank | A | rʲek | E | abr | C | tʊman | A | ɔsmun | A | ʃamɔl | B | βafr | B | ɪx | B |
| **Y-Safedorak 1** | ʧank | A | zamin | C | abr | C | tuman | A | ɔsmɔn | A | ʃamɔl | B | barf | B | ex | B |
| **Y-Safedorak 2** | ʧank | A | zamin | C | abr | C | tuman | A | ɔsmʊn | A | ʃamɔl | B | barf | B | ex | B |
| **Y-Safedorak 3** |  |  |  |  |  |  |  |  |  |  |  |  |  |  |  |  |

| **Informant** | **smoke** | | **fire** | | **ashes** | | **to burn** | | **road** | | **mountain** | | **red** | | **green** | |
| --- | --- | --- | --- | --- | --- | --- | --- | --- | --- | --- | --- | --- | --- | --- | --- | --- |
| **Ka-Gazli 1** | tʉtʉn | A | wɔt | A | kʉl | A | ʒaɣu | A | ʒɔl | A | taw | A | qɨzɨl | A | ʒasɨł | A |
| **Ka-Gazli 2** | tytyn | A | ʒalɨn | B | kʉl | A | ʒaɣu | A | ʒɔl | A | taw | A | qɨzɨł | A | ʒasɨł | A |
| **Ka-Gazli 3** | tytyn | A | wɔt | A | kʉl | A | ʒaɣu | A | ʒɔł | A | taw | A | qɨzɨł | A | ʒasəł | A |
| **Ka-Gazli 4** | tytyn | A | wɔt | A | kʉł | A | ʒaɣu | A | ʒoł | A | taw | A | qɨzɨł | A | ʒasəł | A |
| **Ka-Gazli 5** | tʉtʉn | A | wɔt | A | kʉł | A | ʒaɣu | A | ʒoł | A | taw | A | qɨzɨł | A | ʒasɜł | A |
| **Ka-Gazli 6** | bu | B | wɔt | A | kʉł | A | ʒaɣu | A | ʒoł | A | taw | A | qɜzɨł | A | ʒasɜł | A |
| **Ka-Gazli 7** | tʉtʉn | A | wɔt | A |  |  | ʒaɣu | A | ʃoł | A | taw | A | qɜzɜł | A | ʒasɜł | A |
| **Ka-Raushan 1** | tytyn | A | wɔt | A | kʉl | A | ʒaɣʊː | A | ʒɔl | A | taʊ | A | qɨzɨl | A | kwøk | B |
| **Ka-Raushan 2** | tytyn | A | wɔt | A | kʉl | A | ʒaɣʊː | A | ʒɔl | A | taʊ | A | qɨzɨl | A | ʒaʃəl | A |
| **Ka-Raushan 3** | tytyn | A | wɔt | A | kʉl | A | ʒaɣʊː | A | ʒɔl | A | taʊ | A | qɨzɨl | A | ʒaʃɨl | A |
| **Ka-Raushan 4** | tylqə | A | wɔt | A | kʉl | A | ʒaɣʊː | A | ʒɔl | A | taʊ | A | qɨzɨl | A | ʒaʃɨl | A |
| **Ki-Akmuz 1** | tytyn | A | ɔt | A | kyl | A | ʤaɣuː | A | ʤɔl | A | tɔː | A | qɨzɨl | A | ʤaʃɪl | A |
| **Ki-Akmuz 2** | tytyn | A | ɔt | A | kyl | A | ʤaɣuː | A | ʤɔl | A | tɔː | A | qɨzɨl | A | ʤaʃɨl | A |
| **Ki-Akmuz 3** | tytyn | A | ɔt | A | gyl | A | ʤaɣuː | A | ʤɔl | A | tɔː | A | qɨzɨl | A | ʤaʃɨl | A |
| **Ki-Barskoon** | tytyn | A | ɔt | A | gʉl | A | ʤaq | A | ʤɔl | A | tɔː | A | qɨzɨl | A | ʤaʃɨl | A |
| **Ki-Kulanak 1** | tytyn | A | ɔt | A | kyl | A | ʤagʊː | A | ʤɔl | A | tɔː | A | qɨzɨl | A | ʤaʃɨl | A |
| **Ki-Kulanak 2** | tytyn | A | ɔt | A | gyl | A | yrtø | B | ʤɔl | A | tɔː | A | qɨzɨl | A | ʤaʃɪl | A |
| **Ki-Kulanak 3** | tytyn | A | ɔt | A | gyl | A | ʤaq | A | ʤol | A | tɔː | A | qɨzɨl | A | ʤaʃɪl | A |
| **Ki-Kulanak 4** | tytyn | A | ɔt | A | kyl | A | ʤaɣuː | A | ʤɔl | A | tɔː | A | qɨzɨl | A | ʤaʃɨl | A |
| **Ki-Kulanak 5** | tytyn | A | ɔt | A | gyl | A | ørttø | B | ʤɔl | A | tɔː | A | qɨzɨl | A | ʤaʃɪl | A |
| **Ki-Orday 1** | tytyn | A | ɔt | A | kyl | A | ʤag˳ | A | ʤɔl | A | tɔː | A | qɨzɨl | A | ʤaʃɪl | A |
| **Ki-Orday 2** | tytyn | A | wɔt | A | kyl | A | ʤɒq | A | ʤɔl | A | tɔː | A | qɨzɨl | A | køk | B |
| **Ki-Orday 3** | tytyn | A | wɔt | A | kyl | A |  |  | ʤɔl | A | tɔː | A | qɨzɨl | A | ʤaʃɪl | A |
| **Ki-Orday 4** | tytyn | A | ɔt | A | kyl | A |  |  |  |  | tɔː | A | qɨzɨl | A | ʤaʃɪl | A |
| **Ki-Tamga** | tytyn | A | ɔt | A | gʉl | A | ʤaɣuː | A | ʤɔl | A | tɔː | A | qɨzɨl | A | ʤaʃɨl | A |
| **KK-Halqabad 1** | tytyn | A | ʒaːlən | B | kʉl | A | ʒaɣʊ | A | ʒɔl | A | taʊ | A | qɨzɨl | A | kwøk | B |
| **KK-Halqabad 2** | tytyn | A | ʒaːlən | B | kʉl | A | ʒaɣʊ | A | ʒɔl | A | taʊ | A | qɨzɨl | A | ʒasɨl | A |
| **KK-Halqabad 3** | tytyn | A | wɔt | A | kʉl | A | ʒaɣʊ | A | ʒɔl | A | taʊ | A | qɨzɨl | A | kʉk | B |
| **KK-Kokdarya 1** | tʊtʊn | A | wɔt | A | kʉl | A | wørtøʊ | B | ʤɔl | A | taʊ | A | qɨzɨl | A | ʤaʃɨl | A |
| **KK-Kokdarya 2** | tytyn | A | wɔt | A | kʉl | A | ʒaɣʊ | A | ʒɔl | A | taʊ | A | qɨzɨl | A | ʒasɨl | A |
| **KK-Kokdarya 3** | tytyn | A | wɔt | A | kʉl | A | ʒaɣʊ | A | ʒɔl | A | taʊ | A | qɨzɨl | A | ʤasɨl | A |
| **KK-Kokdarya 4** | tytyn | A | wɔt | A | kʉl | A | ʒaɣʊː | A | ʒɔl | A | taʊ | A | qɨzɨl | A | ʒasɨl | A |
| **KK-Shege 1** | tytyn | A | ʒaːlən | B | kʉl | A | ʒaɣʊ | A | ʒɔl | A | taʊ | A | qɨzɨl | A | kʉk | B |
| **KK-Shege 2** | tytyn | A | wɔt | A | kʉl | A | ʒaɣʊː | A | ʒɔl | A | taʊ | A | qɨzɨl | A | kʊk | B |
| **KK-Shege 3** | tytyn | A | ʒ˳aːlən | B | kʉl | A | ʒaɣʊ | A | ʒɔl | A | taʊ | A | qɨzɨl | A | ʒasɨl | A |
| **KK-Shege 4** | tytyn | A | wɔt | A | kʉl | A | ʒaɣʊ | A | ʒɔl | A | taʊ | A | qɨzɨl | A | ʒasɨl | A |
| **U-Hitoy 1** | tytyn | A | wɔt | A | kʉl | A | ʤaɣʊː | A | ʤɔl | A | taʊ | A | qɨzɨl | A | jaʃɨl | A |
| **U-Hitoy 2** | tytyn | A | wɔt | A | kʉl | A | ʤaɣʊː | A | ʤɔl | A | taɔ | A | qɨzɨl | A | ʤasɨl | A |
| **U-Hitoy 3** | tytyn | A | wɔt | A | kʉl | A | ʤaɣʊː | A | ʤɔl | A | taɔ | A | qɨzɨl | A | ʤasɨl | A |
| **U-Novmetan 3** | dud | C | ɔlɔv | C | kul | A | jɔndəriʃ | C | jʉl | A | tɔɣ˳ | A | qɨzɨl | A | kʉk | B |
| **U-Soy Mahalla 1** | tutun | A | ɔt | A | pʲepʲɛl | B | jɔqmɔq | D | jɔl | A | tɔɣ | A | qɨzɨl | A | zangʲɔrɪ | C |
| **U-Soy Mahalla 2** | tytyn | A | alɔv | C | kʉl | A | jɔndɪrmɔq | C | jɔl | A | tɔɣ˳ | A | qɨzɨl | A | køk | B |
| **U-Soy Mahalla 3** | tʉtʉn | A | ɔt | A | kʉl | A | jaqɪʃ | D | jɔl | A | tɔɣ˳ | A | qɨzɨl | A | køk | B |
| **U-Urtoqqishloq 1** | tytyn | A | alɔw | C | kʉł | A | jɔqɪʃ | D | jʉl | A | tɔx | A | qɨzɨl | A | jaʃɪl | A |
| **U-Urtoqqishloq 2** | tytyn | A | alɔw | C | kʉł | A | jɔqmɔq | D | jʉl | A | tɒɣ˳ | A | qɨzɨl | A | jaʃɪl | A |
| **U-Urtoqqishloq 3** | tytyn | A | alɔw | C | kʉł | A | jɔqmɔq | D | jʉl | A | tɔɣ˳ | A | qɨzɨl | A | jaʃɪl | A |
| **U-Urtoqqishloq 4** | tytyn | A | alɔw | C | kʉł | A | jɔqmɔq | D | jʊl | A | tɔɣ˳ | A | qɨzɨl | A | jaʃɪl | A |
| **U-Zarmanak 3** | tutun | A | ɔlɔv | C | kul | A | jɔndɪrmɔq | C | jʉl | A | tɔɣ˳ | A | qɨzɨl | A | kʉk | B |
| **U-Zarmanak 4** | tutun | A | ɔlɔv | C | kul | A | jɔqmɔq | D | jʉl | A | tɔɣ˳ | A | qɨzɨl | A | jaʃɪl | A |
| **T-Agalyk** | dʉd̥ | C | alɔw | C | xɔkiʃtar | D | dargerondan | H | rɔh | C | kʉh | C | sʉrx | B | kabud̥ | F |
| **T-Kamangaron 1** | dud̥ | C | alɔw | C | xɔkistar | D | dargɪrundan | H | roh | C | kyh | C | surx | B | zangor | C |
| **T-Kamangaron 2** | dud̥ | C | alɔb | C | xɔkistar | D | syxtan | I | roh | C | køh | C | surx | B | zangor | C |
| **T-Kamangaron 3** | tutun | A | alaɔ | C |  |  | gerɔndan | H | rah | C | køh | C | surx | B |  |  |
| **T-Kamangaron 4** |  |  | alɔw | C | xɔkistar | D | dargerondan | H | rah | C | køh | C | surx | B | zangɔr | C |
| **T-Kaptarhona 1** | tutun | A | alaw | C | xɔkstar | D | dargerundan | H | rah | C | køh | C | sørx | B | saβuz̥ | G |
| **T-Kaptarhona 2** | dud | C | aɣaw | C | xokistar | D | dargerundan | H | rɔh | C | kuh | C | surx | B | kabut | F |
| **T-Kaptarhona 3** | dud̥ | C | alav | C | xokistar | D | alav | J | rah | C | kʊh | C | sørx | B | kabut | F |
| **T-Kaptarhona 4** | dud̥ | C | alaw | C | xokstar | D | dargurundan | H | rah | C | kʊh | C | surx | B | kabut | F |
| **T-Kaptarhona 5** | dd̩ | C | alaɔ | C | xɔkstar | D | dargʲerundan | H | rah | C | kh̩ | C | sr̩x | B | kabt̩ | F |
| **T-Navdî 1** | dud̥ | C | alɔv | C | xɔkɪstar | D | alɔv | J | rah | C | kʊh | C | surx | B | kabud̥ | F |
| **T-Navdî 2** | dud̥ | C | alɔv | C | xɔkɪstar | D | dargirundan | H | rɔh | C | kʊh | C | sʉrx | B | savz | G |
| **T-Navdî 3** | dud̥ | C | alɔv | C | xɔkɪstar | D | alɔv | J | rɔh | C | kuh | C | surx | B | savz | G |
| **T-Nimich 1** | dud̥ | C | alɔw | C | xɔkɪstar | D | suxtagi | I | rɔh | C | kʉh | C | sʉrx | B | savz | G |
| **T-Nimich 2** | dʊd | C | ɔtaʃ | A | xɔkɪstar | D | suzɔndan | K | rɔh | C | kuh | C | surx | B | sawz | G |
| **T-Nimich 3** | dud̥ | C | alɔw | C | xɔkɪstar | D | suxtan | I | rah | C | kh̩ | C | sərx | B | sawz | G |
| **T-Nimich 4** | dʊd̥ | C | alɔw | C | xɔkɪstar | D | dargirondan | H | rah | C | kh̩ | C | sərx | B | sawz | G |
| **T-Novmetan 1** | tutun | A | ɔlaw | C | kul | A | girɔn | H | rah | C | tɔɣ˳ | A | surx | B | kabɨt | F |
| **T-Novmetan 2** |  |  | ɔlɣa | C |  |  |  |  | ra | C | balandi[[37]](#footnote-38) | D | surx | B | kabɨt | F |
| **T-Nûshor 1** | dʊd̥ | C | alɔw | C | xɔkɪstar | D | suxtan | I | rɔh | C | kh̩ | C | sərx | B | sawz | G |
| **T-Nûshor 2** | dʊd̥ | C | alɔw | C |  |  | dargirʊndan | H | rɔh | C | kʊh | C | sʊrx | B | kabud | F |
| **T-Nûshor 3** | dʊd̥ | C | alɔw | C | xɔkɪstar | D | suxtan | I | rah | C | pS̩ta | E | sərx | B | sawz | G |
| **T-Rishtan 1** | dyd̥ | C | ɒlɔb̥ | C | xɔkistar | D | dargʲerundan | H | rah | C | kʊh | C | syrx | B | zangɔr | C |
| **T-Rishtan 2** | dyd̥ | C | alɔb̥ | C | xɔkistar | D | dargʲirundan | H | rɒh | C | kuh | C | surx | B | kabut | F |
| **T-Rishtan 3** | dyd̥ | C | alɔb̥ | C | xɔkistar | D | dargʲɪrundan | H | rah | C | kyh | C | syrx | B | kabut | F |
| **T-Shink 1** | dd̩ | C | alɔv | C | xɔkistar | D | sʊxtan | I | rɔh | C | kʉh | C | sʉrx | B | kabɨd | F |
| **T-Shink 2** | dud | C | alɔv | C | xɔkistar | D | dargirundan | H | rɔh | C | kʉh | C | sʉrx | B | sabz | G |
| **T-Shink 3** | dyd | C | ɔtaʃ | A | xɔkistar | D | dargirundan | H | rɔh | C | kʉh | C | sʉrx | B | savz | G |
| **T-Urmetan 1** | dyt | C | alɔb | C | xɔkɪstar | D | dargirundan | H | rɔh | C | kʉh | C | sʉrx | B | sabz | G |
| **T-Urmetan 2** | dud̥ | C | alɔw | C | xɔkɪstar | D | suzɔndan | K | rɔh | C | kuh | C | sʉrx | B | kabud | F |
| **T-Urmetan 3** | dyt | C | ɔtaʃ | A | xɔkɪstar | D | dargirundan | H | rɔh | C | kʉh | C | sʉrx | B | savz | G |
| **T-Urmetan 4** | dd̩ | C | alɔv | C | xɔkɪstar | D | dargirundan | H | rɔh | C | kʉh | C | sʉrx | B | kabɨd | F |
| **T-Zarmanak 1** | dud̥ | C | ɔlaw | C | xɔkistar | D | sʉxtan | I | rah | C | tɔɣ | A | surx | B | kabɨt | F |
| **T-Zarmanak 2** | dud̥ | C | ɔlaw | C | xɔkistar | D | grɔndan | H | raː | C | tɔɣ˳ | A | surx | B |  |  |
| **Y-Dugova 1** | dud | C | ɔlɔw | C | xɔkɪstar | D | ɔlɔw | J | rɔˑt | C | ɣar | F | sʉrx | B | kabud̥ | F |
| **Y-Dugova 2** | dud | C | ɔlɔw | C | xɔkɪstar | D | ɔlɔwi | J | rɔs | C | ɣar | F | surx | B | sabz | G |
| **Y-Safedorak 1** | dʉd | C | ɔlɔβ | C | xɔkɪstar | D | ɔlxaʃonak | L | rɔt | C | ɣar | F | surx | B | sabz | G |
| **Y-Safedorak 2** | did | C | ɔlɔw | C | xɔkɪstar | D | ɔlxaʃʊnak | L | rɔːt | C | ɣɔr | F | surx | B | sabz | G |
| **Y-Safedorak 3** |  |  |  |  |  |  |  |  |  |  |  |  |  |  |  |  |

| **Informant** | **yellow** | | **white** | | **black** | | **night** | | **day** | | **year** | | **autumn** | | **warm** | | **cold** | |
| --- | --- | --- | --- | --- | --- | --- | --- | --- | --- | --- | --- | --- | --- | --- | --- | --- | --- | --- |
| **Ka-Gazli 1** | sarɜ | A | aq | A | qara | A | tʉn | A | kʉndɪz̥ | A | ʒɨł | A | kʉz̥ | A | ʒɨlɜ | A | suːq | A |
| **Ka-Gazli 2** | sarɜ | A | aq | A | qara | A | tʉn | A | kʉn | B | ʒɨł | A | kʉz̥ | A | ʒɪłłɜ | A | suːq | A |
| **Ka-Gazli 3** | sarɜ | A | aq | A | qara | A | tʉn | A | kʉndɨz̥ | A | ʒɨł | A | kʉz̥ | A | ʒɪlɜ | A | suːq | A |
| **Ka-Gazli 4** | sarɜ | A | aq | A | qara | A | tʉn | A | kʉn | B | ʒɨł | A | kʉz̥ | A | ʒɪlɜ | A | suːq | A |
| **Ka-Gazli 5** | sarɨ | A | aq | A | qara | A | tʉn | A | kʉn | B | ʒɨł | A | kʉz̥ | A | ʒɪllɜ | A | mozdæj | B |
| **Ka-Gazli 6** | sarɨ | A | aq | A | qara | A | tʉn | A | kʉndɨz̥ | A | ʒɨł | A | kʉz̥ | A | ʒɨłɜ | A | suwuq | A |
| **Ka-Gazli 7** | sarɜ | A | aq | A | qara | A | tʉn | A | kʉndɨz̥ | A | ʒɨł | A | kʉz̥ | A | ʃɨłɜ | A | suːq | A |
| **Ka-Raushan 1** | sarɨ | A | aq | A | qɒra | A | tʉn | A | kʉn | B | ʒɨl | A | kʉz̥ | A | ʒɨllɨ | A | sʊːq | A |
| **Ka-Raushan 2** | sarə | A | aq | A | qara | A | tʉn | A | kʉn | B | ʒɪl | A | kʉz̥ | A | ʒɨllɨ | A | sʊːq | A |
| **Ka-Raushan 3** | sarɨ | A | aq | A | qara | A | tʉn | A | kʉn | B | ʒɨl | A | kʉz̥ | A | ʒɨllɨ | A | sʊːq | A |
| **Ka-Raushan 4** | sarɨ | A | aq | A | qara | A | tʉn | A | kʉn | B | ʒɪl | A | kʉz̥ | A | ʒɨllɨ | A | sʊːq | A |
| **Ki-Akmuz 1** | sarɨ | A | aq | A | qara | A | tyn | A | kyndɨz̥ | A | ʤɪl | A | gyz̥ | A | ʤɨlʊː | A | sʊːq | A |
| **Ki-Akmuz 2** | sarɨ | A | aq | A | qara | A | tyn | A | kyn | B | ʤɪl | A | gyz̥ | A | ʤɨlʊː | A | sʊːq | A |
| **Ki-Akmuz 3** | sarɨ | A | aq | A | qara | A | tyn | A | gyn | B | ʤɪl | A | gyz̥ | A | ʤɨlʊː | A | sʊːq | A |
| **Ki-Barskoon** | sarɨ | A | aq | A | qara | A | tyn | A | kʉn | B | ʤɪl | A | kʉz̥ | A | ʤɪlʊː | A | sʊːq | A |
| **Ki-Kulanak 1** | sarɨq | A | aq | A | qara | A | tyn | A | kyn | B | ʤɪł | A | kyz̥ | A | ʤɨlʊː | A | sʊːq | A |
| **Ki-Kulanak 2** | sarɨ | A | aq | A | qara | A | tyn | A | gyn | B | ʤɪł | A | gyz̥ | A | ʤɨlʊː | A | sʊːq | A |
| **Ki-Kulanak 3** | sarɨ | A | aχ | A | qara | A | tyn | A | gyn | B | ʤɪl | A | gyz̥ | A | ʤɨlʊː | A | muzdaq | B |
| **Ki-Kulanak 4** | sarɨ | A | aq | A | qara | A | tyn | A | kyn | B | ʤɪl | A | gyz̥ | A | ʤɨlʊː | A | muzdaq | B |
| **Ki-Kulanak 5** | sarɨ | A | aq | A | qara | A | tyn | A | gyn | B | ʤɪl | A | gyz̥ | A | ʤɨlʊː | A | sʊːq | A |
| **Ki-Orday 1** | sarɜq | A | ɒq | A | qɔra | A | tʉn | A | gyn | B | ʤɪl | A | gyz̥ | A | ʤɪlʊː | A | sʊːk | A |
| **Ki-Orday 2** | sarɜq | A | ɒq | A | qɒra | A | tyn | A | gyn | B | ʤɪl | A | kyz̥ | A | ʤɪlʊː | A | sʊːk | A |
| **Ki-Orday 3** | sarɜq | A | ɒq | A | qɒra | A | tyn | A | gyn | B | ʤɪl | A | kyz̥ | A | ʤɪlʊː | A | sʊːk | A |
| **Ki-Orday 4** | sarɨ | A | ɒq | A | qɒra | A | tyn | A | kyndyz̥ | A | ʤɪl | A | kyz̥ | A | ʤɨlʊː | A | sʊːk | A |
| **Ki-Tamga** | sarɨ | A | aq | A | qara | A | tyn | A | gʉn | B | ʤɪl | A | gʉz̥ | A | ʤɨlʊː | A | muzdaq | B |
| **KK-Halqabad 1** | sarɜ | A | aq | A | qara | A | tʉn | A | kʉn | B | ʒɨl | A | gʉz̥ | A | issə | B | sʊːq | A |
| **KK-Halqabad 2** | sarɜ | A | aq | A | qara | A | tʉn | A | kʉndɨz̥ | A | ʒɨl | A | gʉz̥ | A | ʒɪllɜ | A | sʊːq | A |
| **KK-Halqabad 3** | sarɐ | A | aq | A | qara | A | tʉn | A | kʉn | B | ʒɨl | A | gʉz̥ | A | ʒɪllɜ | A | sʊːq | A |
| **KK-Kokdarya 1** | sarɨ | A | aq | A | qara | A | tʉn | A | kʉn | B | ʤɪl | A | kʉz̥ | A | issə | B | sʊːq | A |
| **KK-Kokdarya 2** | sarɨ | A | aq | A | qɒra | A | tʉn | A | kʉn | B | ʒɨl | A | gʉz̥ | A | ʒɨllɨ | A | sʊːq | A |
| **KK-Kokdarya 3** | sarɨ | A | aq | A | qɒra | A | tʉn | A | kun | B | ʒɨl | A | kʉz̥ | A | ʒɨllɨ | A | sʊːq | A |
| **KK-Kokdarya 4** | sarɨ | A | aq | A | qɒra | A | tʉn | A | kʉn | B | ʒɨl | A | gʉz̥ | A | ʒɨllɨ | A | sʊːq | A |
| **KK-Shege 1** | sarə | A | aq | A | qara | A | tʉn | A | kʉn | B | ʒɪl | A | gʉz̥ | A | ʒɪllɨ | A | sʊːq | A |
| **KK-Shege 2** | sarɜ | A | aq | A | qara | A | tʉn | A | kʉn | B | ʒɪl | A | kʉz̥ | A | ʒɪllɨ | A | sʊːq | A |
| **KK-Shege 3** | sarɜ | A | aq | A | qara | A | tʉn | A | kʉn | B | ʒɨl | A | gʉz̥ | A | ʒɪllɨ | A | sʊːq | A |
| **KK-Shege 4** | sarɜ | A | aq | A | qara | A | tʉn | A | kʉn | B | ʒɨl | A | gʉz̥ | A | ʒɪllɨ | A | sʊːq | A |
| **U-Hitoy 1** | sarɜ | A | aq | A | qara | A | tʉn | A | kʉn | B | jɪl | A | kʉz̥ | A | issə | B | sʊːk | A |
| **U-Hitoy 2** | sarɜ | A | aq | A | qara | A | tʉn | A | kʉndɨz | A | ʤɪl | A | kʉz̥ | A | issə | B | sʊːq | A |
| **U-Hitoy 3** | sarɜ | A | aq | A | qara | A | tʉn | A | kʉndɨz | A | ʤɪl | A | kʉz̥ | A | ʤɨllɨ | A | sʊːq | A |
| **U-Novmetan 3** | sarəq | A | ɔq | A | qora | A | keʧqʊrʊn[[38]](#footnote-39) | B | kun | B | jil | A | kuz̥ | A | issəq | B | sɔβuk | A |
| **U-Soy Mahalla 1** | sarɜq | A | ɔq | A | qɔra | A | tun | A | kʉndʉz̥ | A | jil | A | kʉz̥ | A | issiq | B | sɔβʊk | A |
| **U-Soy Mahalla 2** | sarɨq | A | ɔq | A | qɔra | A | tʉn | A | kʉn | B | jil | A | kʉz̥ | A | illɜq | C | sɔβʊq | A |
| **U-Soy Mahalla 3** | sarɜq | A | ɔq | A | qɔra | A | tʉn | A | kʉndʉz | A | jil | A | kʉz̥ | A | illɜq | C | sɔβʊq | A |
| **U-Urtoqqishloq 1** | sarəq | A | ɔq | A | qɔra | A | ɔqʃɔn | C | kʉn | B | jɪł | A | kʉz̥ | A | issɪq | B | sɔwʊq | A |
| **U-Urtoqqishloq 2** | sarəq | A | ɔq | A | qɔra | A | ɔqʃɔn | C | kʉndʉz | A | jɪł | A | kʉz̥ | A | illəq | C | sɒwʊq | A |
| **U-Urtoqqishloq 3** | sarəq | A | ɔq | A | qɔra | A | ɔqʃɔn | C | kʉndʉz | A | jɪł | A | kʉz̥ | A | issəq | B | sɔwʊq | A |
| **U-Urtoqqishloq 4** | sarəq | A | ɔq | A | qɔra | A | ɔqʃɔn | C | kʉndʉz | A | jɨł | A | kʉz̥ | A | issəq | B | sɔwʊq | A |
| **U-Zarmanak 3** | sarəq | A | ɔq | A | qɔra | A | tun | A | kun | B | jil | A | kuz̥ | A | issiq | B | sɔβuk | A |
| **U-Zarmanak 4** | sarəq | A | ɔq | A | qora | A | tun | A | kun | B | jil | A | kʊz | A | iləq | C | sɔβuk | A |
| **T-Agalyk** | zard | B | safʲed̥ | B | sijɔh | B | ʃab | E | rʊz | E | sɔl | B |  |  | garm | D | xʊnuk | C |
| **T-Kamangaron 1** | zard̥ | B | safʲed̥ | B | sijɔ | B | ʃab̥ | E | rʊz | E | sol | B |  |  | garm | D | xunuk | C |
| **T-Kamangaron 2** | zard | B | safʲed̥ | B | sijɒ | B | ʃab̥ | E | røz | E | sɔl | B |  |  | garm | D | xunuk | C |
| **T-Kamangaron 3** | zard | B | safɪd | B | sijɔh | B | ʃap | E | røz̥ | E | sol | B |  |  | garm | D | xunuk | C |
| **T-Kamangaron 4** |  |  | safʲed | B | sijɔ | B | ʃab̥ | E | røz̥ | E | sɔl | B |  |  | garm | D | xənuk | C |
| **T-Kaptarhona 1** | zard | B | safʲed | B | sija | B | ʃau | E | ruz | E | sɔl | B |  |  | garəm | D | xenɛk | C |
| **T-Kaptarhona 2** | zard | B | safʲed | B | sijɔh | B | ʃab | E | ruz | E | sɔl | B |  |  | garm̩ | D | xunuk | C |
| **T-Kaptarhona 3** | zard | B | safʲɛd̥ | B | sijɒ | B | ʃaw | E | rʊz | E | sɔl | B |  |  | garm | D | xənək | C |
| **T-Kaptarhona 4** | zard | B | safʲed | B | sijɒ | B | ʃaw | E | ruz | E | sɔl | B |  |  | garəm | D | xʊnuk | C |
| **T-Kaptarhona 5** | zard | B | safʲed | B | sijɒ | B | ʃaɔ | E | ruz̥ | E | sɔl | B |  |  | garəm | D | xanko | C |
| **T-Navdî 1** | zard | B | safʲed | B | sijɔh | B | ʃav | E | ruz | E | sɔl | B |  |  | garm | D | xunuk | C |
| **T-Navdî 2** | zard | B | safʲed | B | sijɔh | B | ʃav | E | ruz | E | sɔl | B | tiramɔh | C | garm | D | xunuk | C |
| **T-Navdî 3** | zard | B | safed̥ | B | sijɔh | B | ʃav | E | ruz | E | sɔl | B | tiramɔh | C | garm | D | xunuk | C |
| **T-Nimich 1** | zard | B | safʲed̥ | B | sijɔh | B | ʃap | E | ruz | E | sɔl | B | tiramɔh | C | garm | D | xunuk | C |
| **T-Nimich 2** | zard | B | safʲed̥ | B | sijɔ | B | ʃab | E | ruz | E | sɔl | B | tiramɔh | C | garm̩ | D | xunuk | C |
| **T-Nimich 3** | zard | B | sfed̥ | B | sijah | B | ʃaβ | E | ruz | E | sɔl | B | tiramɔh | C | garm | D | xənək | C |
| **T-Nimich 4** | zard | B | sfed̥ | B | sijɔh | B | ʃav | E | ruz | E | sɔl | B | tiramɔh | C | garm | D | xənək | C |
| **T-Novmetan 1** | zart | B | safʲed̥ | B | sijɔ | B | ʃap | E | rʉz̥ | E | sol | B | tiramɔ | C | garm | D | xunuk | C |
| **T-Novmetan 2** | zard̥ | B | safed̥ | B | sijɔ | B | ʃab̥ | E | rʉz | E | sɔl | B | tramɔ | C | garm | D | xunuk | C |
| **T-Nûshor 1** | zard̥ | B | safʲɛd̥ | B | sijɔh | B | ʃab | E | ruz | E | sɔl | B | tiramɔh | C | garm̩ | D | xənʊk | C |
| **T-Nûshor 2** | zard | B | safʲed̥ | B | sijɔh | B | ʃab | E | ruz | E | sɔl | B | tiramɔh | C | garm | D | xʊnʊk | C |
| **T-Nûshor 3** | zard̥ | B | sfet | B | sijɔh | B | ʃaw | E | ruz | E | sɔl | B | tiramɔh | C | garm | D | xənək | C |
| **T-Rishtan 1** | zard | B | safʲed̥ | B | sijɔ | B | ʧhab̥ | E | ruz̥ | E | shɔl | B |  |  | garm | D | xunyk | C |
| **T-Rishtan 2** | zard | B | safʲed̥ | B | sijɔ | B | ʃab̥ | E | ruz̥ | E | sɔl | B |  |  | garmo | D | xunuk | C |
| **T-Rishtan 3** | zard | B | safʲed̥ | B | sijɔh | B | tɔrikɪ[[39]](#footnote-40) | F | ruz̥ | E | sol | B |  |  | garəm | D | xunyk | C |
| **T-Shink 1** | zard | B | safʲɪd | B | sijɔ | B | ʃap | E | rʊz | E | sɔl | B | tiramɔh | C | garm | D | xənuk | C |
| **T-Shink 2** | zard | B | safɪd | B | sijɔ | B | ʃab | E | rʊz | E | sɔl | B | tiramɔh | C | garm | D | xənʊk | C |
| **T-Shink 3** | zard | B | safʲɪd | B | sijɔ | B | ʃap | E | rʊz | E | sɔl | B | tiramɔh | C | garm | D | xʉnʉk | C |
| **T-Urmetan 1** | zard | B | safʲɪd | B | sijɔh | B | ʃab | E | rʊz | E | sɔl | B | tiramɔh | C | garm | D | xənʊk | C |
| **T-Urmetan 2** | zard | B | safʲed | B | sijɔh | B | ʃab | E | rʊz | E | sɔl | B | tiramɔh | C | garm | D | xənək | C |
| **T-Urmetan 3** | zard | B | safʲɪd | B | sijɔh | B | ʃab̥ | E | rʊz | E | sɔl | B | tiramɔh | C | garm | D | xənyk | C |
| **T-Urmetan 4** | zard | B | safʲed | B | sijɔh | B | ʃab̥ | E | rʊz | E | sɔl | B |  |  | garm | D | xənyk | C |
| **T-Zarmanak 1** | zard̥ | B | safed̥ | B | sijɔ | B | ʃab̥ | E | rʉz | E | sɔl | B | tiramɔ | C | garm | D | xunuk | C |
| **T-Zarmanak 2** | zard̥ | B | safed̥ | B | sijɔˑ | B | ʃab̥ | E | rʉz | E | sɔl | B | tiramɔ | C | garm | D | xunuk | C |
| **Y-Dugova 1** | zard | B | safʲed̥ | B | sijɔ | B | xiʃap | G | met | F | sɔl | B | tiramɔh | C | ɣarm | D | xʊnʊk | C |
| **Y-Dugova 2** | zard | B | safʲed̥ | B | sijɔh | B | vjɔra | H | met | F | sɔl | B | tirmɔ | C | ɣarm | D | xʊnʊk | C |
| **Y-Safedorak 1** | zard | B | safʲed̥ | B | ʃɔw | B | xɪʃap | G | mʲet | F | sɔl | B | tirma | C | ɣarm | D | xʊnʊk | C |
| **Y-Safedorak 2** | zard | B | safed̥ | B | ʃɔw | B | xʃap | G | met | F | sɔl | B | tirma | C | ɣarm | D | xʊnʊk | C |
| **Y-Safedorak 3** |  |  |  |  |  |  |  |  |  |  |  |  |  |  |  |  |  |  |

| **Informant** | **full** | | **new** | | **old** | | **good** | | **bad** | | **rotten** | | **dirty** | | **straight** | |
| --- | --- | --- | --- | --- | --- | --- | --- | --- | --- | --- | --- | --- | --- | --- | --- | --- |
| **Ka-Gazli 1** | tɔləq | A | ʒʲaŋa | A | kwønʲɪ | A | Zaxsə | A | ʒaman | A | ʃirigin | A | łas | A | tɨzɨł | A |
| **Ka-Gazli 2** | tɔlɜ | A | ʒʲaŋa | A | kønʲɪ | A | Zaxsə | A | ʒaman | A | ʃirigin | A | las | A | tuɣrə | B |
| **Ka-Gazli 3** | tɔlɜq | A | ʒaŋa | A | kwønʲɪ | A | Zaxsə | A | ʒaman | A | ʃirigin | A | łas | A | tuɣrə | B |
| **Ka-Gazli 4** | toləq | A | ʒaŋa | A | kønʲɪ | A | Zaxsə | A | ʒaman | A | ʃirik | B | kʉr | B | tɪk | C |
| **Ka-Gazli 5** | tɔlɜq | A | ʒaŋa | A | kwʊnʲe | A | Zaxsə | A | ʒaman | A | ʃirigin | A | kʉr | B | tuɣrə | B |
| **Ka-Gazli 6** | tɔlɜ | A | ʒaŋa | A | kwønʲe | A | Zaxsə | A | ʒaman | A | rɨndigin | C | las | A | turə | B |
| **Ka-Gazli 7** | tɔlq | A | tazɜ | B | jeskɪ | B | Zaxsə | A | ʒaman | A |  |  | kʉr | B |  |  |
| **Ka-Raushan 1** | tɔlɜ | A | taza | B | kʊnʲɪ | A | Zaxs1 | A | ʒaman | A | ʃɪrɪk | B | patas | C | tuːrɨ | B |
| **Ka-Raushan 2** | tɔlq | A | taza | B | gunʲe | A | Zaxs1 | A | ʒaman | A | ʃɪrɪk | B | kər | B | døzʊ | A |
| **Ka-Raushan 3** | tɔlɜq | A | ʒaŋa | A | jɪskə | B | Zaxs1 | A | ʒaman | A | ʃɪrk | B | kər | B | tuːrɐ | B |
| **Ka-Raushan 4** | tɔlɜq | A | ʒaŋa | A | kwønʲe | A | Zaxs1 | A | ʒaman | A | ʃɪrɪk | B | kər | B | tuːrɨ | B |
| **Ki-Akmuz 1** | tɔlʊq | A | ʤaŋɐ | A | qarɨ | D | dZaqS1 | A | ʤaman | A | ʧirik | B | gɪr | B | tyz̥ | A |
| **Ki-Akmuz 2** | tɔlʊq | A | ʤaŋɐ | A | jɪskɪ | B | dZaqS1 | A | ʤaman | A | ʧirik | B | gɪr | B | tyz̥ | A |
| **Ki-Akmuz 3** | tɔlʊq | A | ʤaŋɐ | A | jɪskɪ | B | dZaqS1 | A | ʤaman | A | ʧirik | B | bulɣanɨʧkɐ | D | tyz̥ | A |
| **Ki-Barskoon** | tɔltʊra | B | ʤaŋə | A | jɪskʲɪ | B | dZaqS1 | A | ʤaman | A | ʧirik | B | kir̯ | B | tʉz̥ | A |
| **Ki-Kulanak 1** | tɔltʊra | B | ʤaŋə | A | jɛskɪ | B | dZaqS1 | A | ʤaman | A | ʧirik | B | kir | B | tyz̥ | A |
| **Ki-Kulanak 2** | tɔlʊq | A | ʤaŋɨ | A | jɛskʲe | B | dZaqS1 | A | ʤaman | A | ʧirik | B | gir | B | tyz̥ | A |
| **Ki-Kulanak 3** | tɔltʊra | B | ʤaŋə | A | jɛskɪ | B | dZaqSI | A | ʤaman | A | ʧirik | B | tazaɛmes | E | tyz̥ | A |
| **Ki-Kulanak 4** | tɔlʊq | A | ʤaŋɐ | A | jɪskɪ | B | dZaqS1 | A | ʤaman | A | ʧirik | B | gɪr | B | tyz̥ | A |
| **Ki-Kulanak 5** | tɔlʊq | A | ʤaŋɨ | A | eskɪ | B | dZaqS1 | A | ʤaman | A | ʧirik | B | gɪr | B | tyz̥ | A |
| **Ki-Orday 1** | tɔləq | A | ʤaŋa | A | jɛskʲɪ | B | dZaqS1 | A | ʤaman | A | ʧɪrɪk | B | kʲir | B | tuːra | B |
| **Ki-Orday 2** | tɔldɜr | B | ʤaŋa | A | jɛskʲɪ | B | dZaqSI | A | ʤaman | A | ʧirik | B | kʲir | B | tuːra | B |
| **Ki-Orday 3** | bardɐdɐ | C | ʤaŋa | A | ɛskɪ | B | dZaxSI | A | ʤaman | A | ʧɪrɪk | B | iflas | F | tuːrə | B |
| **Ki-Orday 4** | tɔlʊq | A | ʤaŋa | A | ɪskɪ | B | dZaxS1 | A | ʤaman | A |  |  | iflas | F | tuːra | B |
| **Ki-Tamga** | tɔltʊra | B | ʤaŋɐ | A | jeskʲe | B | dZaqS1 | A | ʤaman | A | ʧirik | B | gɪr | B | tyz̥ | A |
| **KK-Halqabad 1** | tɔlɜq | A | taza | B | gʊnʲe | A | Zaxs1 | A | ʒaman | A | ʃɪrɪk | B | patas | C | døzʊː | A |
| **KK-Halqabad 2** | tɔlɜq | A | taza | B | jiskʲe | B | Zaxs1 | A | ʒaman | A | ʃɪrɪk | B | kər | B | tuːrə | B |
| **KK-Halqabad 3** | tɔlɜq | A | taza | B | gʊnʲɪ | A | Zaxs1 | A | ʒaman | A | saːsɨq | D | patas | C | tuːrə | B |
| **KK-Kokdarya 1** | tɔlɜ | A | ʒaŋa | A | køne | A | jaxs1 | A | ʒaman | A | ʃɪrɪk | B | patas | C | tʊrɨ | B |
| **KK-Kokdarya 2** | tɔlɜʔ | A | ʒaŋa | A | gwʊnʲɪ | A | Zaxs1 | A | ʒaman | A | ʃɪrɪk | B | patas | C | tuːra | B |
| **KK-Kokdarya 3** | tɔlɜq | A | ʒaŋa | A | kwʊnʲɪ | A | Zaxs1 | A | ʒaman | A | ʃɪrɪk | B | patas | C | tuːrɐ | B |
| **KK-Kokdarya 4** | tɔlɜq | A | ʒaŋa | A | jeskɨ | B | Zaxs1 | A | ʒaman | A | ʃɪrɨk | B | patas | C | turɨ | B |
| **KK-Shege 1** | tɔlɜ | A | taza | B | gʊnʲɪ | A | Zaxs3 | A | ʒaman | A | ʃɪrɪk | B | kər | B | tuːrə | B |
| **KK-Shege 2** | tɔlɜq | A | taza | B | gʊnʲɪ | A | Zaxs1 | A | ʒaman | A | ʃɪrɪk | B | kɨr | B | tuːrə | B |
| **KK-Shege 3** | tɔlɜq | A | taza | B | gønʲɪ | A | Zaxs1 | A | ʒ˳aman | A | ʃɪrɪk | B | patas | C | tuːrə | B |
| **KK-Shege 4** | tɔlɜ | A | taza | B | gønʲɪ | A | Zaxs1 | A | ʒaman | A | ʃɪrɪk | B | patas | C | tuːrə | B |
| **U-Hitoy 1** | tɔlɜ | A | taza | B | gʊne | A | jaxS1 | A | ʤaman | A | ʧɪrɪk | B | kər | B | tuːrɐ | B |
| **U-Hitoy 2** | tɔlɜ | A | taza | B | gʊnʲe | A | jaxS1 | A | ʤaman | A | ʧɪrɪk | B | patas | C | tuːrɨ | B |
| **U-Hitoy 3** | tɔlɜ | A | taza | B | jiskʲə | B | jaxS1 | A | ʤaman | A | ʃɪrɪk | B | kər̯ | B | tuːrə | B |
| **U-Novmetan 3** | tʉla | A | jaŋi | A | eski | B | jaxSI | A | jɔmɔn | A | ʧirigan | A | iflɔs | F | tʉɣrɪ | B |
| **U-Soy Mahalla 1** | tɔla | A | jaŋi | A | ɛski | B | jaxS1 | A | jɔmɔn | A | ʧirigan | A | iflɒs | F | tʊɣrɪ | B |
| **U-Soy Mahalla 2** | tɔlɐ | A | jaŋʲɪ | A | ɛskʲɪ | B | jaxSə | A | jɔmɔn | A | ʧirigan | A | iflɔs | F | tʊɣrɨ | B |
| **U-Soy Mahalla 3** | tɔldər | B | jaŋɪ | A | ɛskʲɪ | B | jaxSə | A | jɔmɔn | A | aʧigan | E | iflɔs | F | tʊɣrɨ | B |
| **U-Urtoqqishloq 1** | tʊla | A | jaŋɪ | A | kəhna | A | jaxSI | A | jɔmɔn | A | ʧɪrɪk | B | ʧɪrkin | I | tɔɣrɨ | B |
| **U-Urtoqqishloq 2** | tʉla | A | jaŋɪ | A | jeskɪ | B | jaxSə | A | jɔmɔn | A | ʧɪrɪɣan | A | ɪflɔs | F | tɔɣrə | B |
| **U-Urtoqqishloq 3** | tʉlɜq | A | jaŋe | A | jɪskɪ | B | jaxSə | A | jɔmɔn | A | ʧɪrɪɣan | A | ɪflɔs | F | tʊɣrə | B |
| **U-Urtoqqishloq 4** | tʊlɜq | A | jaŋe | A | jɪskɪ | B | jaxSI | A | jɔmɔn | A | ʧɪrɪgan | A | ɪflɒs | F | tʊɣrə | B |
| **U-Zarmanak 3** |  |  | jaŋi | A | ɪski | B | jaxSI | A | jɔmɔn | A | ʧirigan | A | kir | B | tʉɣri | B |
| **U-Zarmanak 4** | tʉlə | A | jaŋi | A | ɪski | B | jaxSI | A | jɔmɔ̃n | A | jarɔqsɪz̥[[40]](#footnote-41) | F | kɨr | B | tʉɣrə | B |
| **T-Agalyk** | pʉrrak | G | naw | C | kʉhna | A | xub_0 | D | bad̥ | E | pusida | L | ʧirkin | I | tuɣri | B |
| **T-Kamangaron 1** | pʊrra | G | naw | C | køhna | A | naGz | E | bad | E | pusidagi | L | ʧirkin | I | rɔst | H |
| **T-Kamangaron 2** | pʊr | H | naɔ | C | køhna | A | naGz | E | ganda | F | pəsidagi | L | ʧirkin | I | rɔst | H |
| **T-Kamangaron 3** | pʊrrak | G | naɔ | C | køhna | A | naGz̥ | E | ganda | F |  |  | ʧirkin | I | tuɣri | B |
| **T-Kamangaron 4** | pur | H | naɔ | C | køhna | A | naGz | E | ganda | F | pusida | L | ʧirkin | I | tyɣri | B |
| **T-Kaptarhona 1** | pør | H | nau | C | køhna | A | naGəz | E | ganda | F | psidagi | L | ʧərk | I | tʊɣri | B |
| **T-Kaptarhona 2** | pur | H | nɔv | C | kuhna | A | naGz | E | ganda | F | psidagi | L | ʧurk | I | tuɣri | B |
| **T-Kaptarhona 3** | pər | H | naw | C | køhna | A | naGz | E | ganda | F |  |  | ʧørk | I | tuɣri | B |
| **T-Kaptarhona 4** | pɨr | H | naw | C | køhna | A | naGz | E | ganda | F | psidas | L | iflɔs | F | tɔɣri | B |
| **T-Kaptarhona 5** | pr̩ | H | naw | C | kəhna | A | naGz | E | ganda | F | psidagi | L | ʧr̩k | I | tuɣri | B |
| **T-Navdî 1** | purrɐ | G | nav | C | kuhna | A | xub_0 | D | bad̥ | E | pusidagi | L | ɣaʤ | H | rɔst | H |
| **T-Navdî 2** | purra | G | nav | C | kuhna | A | xUb_0 | D | ganda | F | pusidagi | L | ɣaʤ | H | rɔsti | H |
| **T-Navdî 3** | pur | H | nav | C | kuhna | A | xUb_0 | D | bezeb[[41]](#footnote-42) | G | pusidagi | L | iflɔs | F | rɔst | H |
| **T-Nimich 1** | pur | H | naw | C | kuhna | A | naGz̥ | E | ganda | F | buginik | M | ɣaʒd | H | rɔstaki | I |
| **T-Nimich 2** | pur | H | naw | C | kuhna | A | naGz | E | bad | E | pusida | L | ɣaʒd | H | rɔst | H |
| **T-Nimich 3** | pr̩ | H | naw | C | kəhna | A | xUb_0 | D | ganda | F | pusidagi | L | ɣajʤ | H | rɔst | H |
| **T-Nimich 4** | pr̩ | H | naw | C | kəhna | A | xUp | D | ganda | F | pusidagi | L | ɣajʤ | H | rɔst | H |
| **T-Novmetan 1** |  |  | naw | C | kʉna | A | sara | F | ganda | F | ganda | N | raswɔ | M | tʉɣri | B |
| **T-Novmetan 2** | pur | H | naw | C | kʉjna | A | sara | F | ganda | F |  |  | ʧirkin | I | rɔs | H |
| **T-Nûshor 1** | pr̩ | H | naw | C | kəhna | A | naGz | E | ganda | F | pusida | L | ɣaʒd | H | rɔstaki | I |
| **T-Nûshor 2** | pur | H | naw | C | kʊhna | A | naGz | E | ganda | F | buj | O | ʤazir | O | rɔst | H |
| **T-Nûshor 3** | pərɐ | G | naw | C | kəhnɐ | A | xUb | D | ganda | F | pusidagi | L | ɣaʒd | H | rɔstaki | I |
| **T-Rishtan 1** | pyrə | G | naw | C | kuhna | A | naGz | E | ganda | F | posidagi | L | ʧirkin | I | tuɣrə | B |
| **T-Rishtan 2** | pør | H | naw | C | kuhna | A | naGz | E | gændæ | F | tɔsidagi | L | harɔm | N | tuɣrə | B |
| **T-Rishtan 3** | pyr | H | naw | C | kuhna | A | naGz | E | ganda | F | tɔsdagɪ | L | ʧirkin | I | tuɣrə | B |
| **T-Shink 1** | pr̩ | H | naw | C | kʉhna | A | naGz | E | ganda | F |  |  | ʧirkin | I | rɔst | H |
| **T-Shink 2** | pr̩ | H | nav | C | kʉna | A | naGz | E | ganda | F |  |  | ʧirkin | I | rɔst | H |
| **T-Shink 3** | pr̩ | H | nav | C | kʉhna | A | naGz | E | ganda | F | pəsidagi | L | ʧirkin | I | rɔst | H |
| **T-Urmetan 1** | pʊr | H | naw | C | kʉhna | A | naGz | E | ganda | F | pusidagi | L | ʧirkin | I | rɔst | H |
| **T-Urmetan 2** | pərra | G | nav | C | kʉna | A | naGz | E | ganda | F | ganda | N | ʧirkin | I | rɔst | H |
| **T-Urmetan 3** | pr̩ | H | naw | C | kʉhna | A | naGz | E | bad̥ | E | pʉsidan | L | ʧirkin | I | rɔst | H |
| **T-Urmetan 4** | pr̩ | H | naw | C | kʉhna | A | naGz | E | ganda | F |  |  | ʧirkin | I | rɔst | H |
| **T-Zarmanak 1** | pur | H | naw | C | kʉhna | A | naGz | E | ganda | F | pʉsidagi | L | ʧirkin | I | rɔst | H |
| **T-Zarmanak 2** | pur | H | naw | C | kʉjna | A | naGz | E | ganda | F | pʉsdagi | L | ʧirkin | I | tʉɣri | B |
| **Y-Dugova 1** | pʊn | H | naw | C | kuhna | A | naGz | E | ganda | F | vajruna | P | ʧirkin | I | tuɣri | B |
| **Y-Dugova 2** | pʊn | H | nava | C | kʉhna | A | xUSrU: | G | bekora | H | putagi | Q | ʧirkin | I | ald | J |
| **Y-Safedorak 1** | pʊn | H | nava | C | kuhna | A | xUp | D | ganda | F | xʊma | R | ʧirkin | I | ald̥ | J |
| **Y-Safedorak 2** | pʊn | H | nava | C | kuhna | A | xUrSU: | G | ganda | F | pʊtax | Q | ʧirkin | I | ald̥ | J |
| **Y-Safedorak 3** |  |  |  |  |  |  |  |  |  |  |  |  |  |  |  |  |

| **Informant** | **round** | | **sharp** | | **dull** | | **smooth** | | **wet** | | **dry** | | **correct** | | **near** | |
| --- | --- | --- | --- | --- | --- | --- | --- | --- | --- | --- | --- | --- | --- | --- | --- | --- |
| **Ka-Gazli 1** | domalɒq | A | ahʃə | A | wøtkərjɪmɪz̥ | A | tʲegɪs | A | sulə | A | qurhaq | A | dərəs | A | ʒaqən | A |
| **Ka-Gazli 2** | døŋelɛk | B | ʉtkər | B | wʉtpɪs | B | tʲegis | A | nam | B | qurhaq | A | tuɣrə | B | ʒɨltraq | B |
| **Ka-Gazli 3** | dʊmalaq | A | wøtkər | B | wøtpɪs | B | tʲɪgɪs | A | lal | C | qʊrɣaq | A | tuɣrə | B | ʒaχɪn | A |
| **Ka-Gazli 4** | døŋɪlɪk | B | wøtkər | B | wøtpɪdə | B | tʲegɪs | A | ɨlɣaw | D | qurgaq | A | dərəs | A | ʒaxən | A |
| **Ka-Gazli 5** | døŋelɛk | B | wøtkər | B | awʃ | C | ʒʉmsaq | B | læm | C | qurɣaq | A | tuɣrə | B | ʒaqən | A |
| **Ka-Gazli 6** | dɔmalaq | A | wøtkər | B | wøtpɪdə | B | tʲegɪs | A | ɨlɣał | D | qʊrɣaq | A | dərəs | A | ʒaqən | A |
| **Ka-Gazli 7** | dʊmalaq | A | wøtkər | B | awʃ | C | tajraq | C |  |  |  |  |  |  | ʒaqən | A |
| **Ka-Raushan 1** | døŋelek | B | wøtkɨr | B | wøtpitən | B | tʲegiz̥ | A | ɨlɣal | D | qurɣaq | A | tʉrʉs | A | ʒaχən | A |
| **Ka-Raushan 2** | døŋelek | B | wøtkɨr | B | wøtpide | B | tʲegiz̥ | A | ɨlɣal | D | qurɣaq | A | dʉrʉs | A | ʒaχən | A |
| **Ka-Raushan 3** | dɔmalaq | A | wøtkɨr | B | wøtpitən | B | tʲegiz̥ | A | ɨlɣal | D | qurɣaq | A | dʉrʉs | A | ʒaχən | A |
| **Ka-Raushan 4** | døŋølʲɛk | B | wøtkɨr | B | tɔpɜr | D | tʲegiz̥ | A | ɨlɣal | D | qurɣaq | A | dørøs | A | ʒaqən | A |
| **Ki-Akmuz 1** | tɔgɔlɔk | B | ʉtkɨr | B | mɔqɔq | E | tegiz̥ | A | nɨm | B | qurɣaq | A | tuːra | B | ʤaqɨn | A |
| **Ki-Akmuz 2** | tegerɛk | B | qurʧ | C | øtpøs | B | tegiz̥ | A | nɨm | B | qurɣaq | A | tys | C | ʤaqɨn | A |
| **Ki-Akmuz 3** | tɔgɔlɔk | B | qurʧ | C | mɔqɔq | E | tegiz̥ | A | nɨm | B | ɣurɣaq | A | tuːra | B | ʤaqɨn | A |
| **Ki-Barskoon** | tegerɛk | B | qurʧ | C | mɔqɔq | E | ʤilma | D | nɨmduː | E | qurɣaq | A | tuːra | B | ʤaqɨn | A |
| **Ki-Kulanak 1** | tɔgɔlɔq | B | qurʧ | C | mɔqɔq | E | ʤalpaq | E | suː | F | qurɣaq | A | tuːra | B | ʤaqɨn | A |
| **Ki-Kulanak 2** | tegerɛk | B | qurʧ | C | mɔqɔq | E | ʤilma | D | suː | F | qurɣaq | A | tuːra | B | ʤaqɨn | A |
| **Ki-Kulanak 3** | tegerɛk | B | qurʧ | C | mɔqɔq | E | tegiz̥ | A | nɨm | B | qurɣaq | A | tys | C | ʤaqɨn | A |
| **Ki-Kulanak 4** | tegerɛk | B | qurʧ | C | mɔqɔq | E | tegiz̥ | A | suː | F | qurɣaq | A | tuːra | B | ʤaqɨn | A |
| **Ki-Kulanak 5** | tegerɛk | B | qurʧ | C | mɔqɔq | E | ʤilma | D | suː | F | qurɣaq | A | tuːra | B | ʤaqɨn | A |
| **Ki-Orday 1** | tɔgɔlɔk | B | øtkɨr | B | øtmøs | B | tegɪs | A | høl | G | kuruk | B | tuːra | B | ʒaqɨn | A |
| **Ki-Orday 2** | tʊmalaq | A | øtkɨr | B | øtpøs | B | ʒumʃak | B | nam | B | quruq | B | tuːra | B | ʤaqɨn | A |
| **Ki-Orday 3** | ajlana | C | øtkʉr | B | øtpøs | B | tʲekɪs | A | øl | G | kuruk | B | tuːrə | B | ʤaqɨn | A |
| **Ki-Orday 4** |  |  | øtkɨr | B |  |  |  |  | høl | G | kuruk | B | tuːra | B | ʤaqɨn | A |
| **Ki-Tamga** | tɔgɔlɔk | B | qurʧ | C | mɔqɔq | E | ʤilma | D | nɨm | B | qurɣaq | A | tuːra | B | ʤaqɨn | A |
| **KK-Halqabad 1** | døŋølʲek | B | wʉtkɨr | B | wʉtpɪs | B | tʲegiz̥ | A | ɨzɣar | H | qurɣaq | A | drs | A | ʒaχən | A |
| **KK-Halqabad 2** | dɔmalaq | A | wʉtkɨr | B | wʉtpɪs | B | tʲegiz̥ | A | ɨɣal | D | qurɣaq | A | drs | A | ʒaχən | A |
| **KK-Halqabad 3** | døŋøløk | B | wʉtkɨr | B | wʉtpɪs | B | tʲegiz̥ | A | ɨzɣar | H | qurɣaq | A | tuːrə | B | ʒaχən | A |
| **KK-Kokdarya 1** | domalaq | A | wøtkɨr | B | tɔpɨr | D | tʲeks | A | øzɣar | H | qurɣaq | A | tuːrə | B | ʤaqən | A |
| **KK-Kokdarya 2** | dʊmalaq | A | wøtkɨr | B | tɔpas | D | tʲegɪz̥ | A | ɨzɣar | H | qurɣaq | A | tørøs | A | ʒaqən | A |
| **KK-Kokdarya 3** | tʊmalaq | A | wøtkɨr | B | wøtmɪs | B | tʲegiz̥ | A | ɨzɣar | H | qurɣaq | A | tørøs | A | ʒaqən | A |
| **KK-Kokdarya 4** | dʊmalaq | A | wøtkɨr | B | wøtpɪs | B | tʲegiz̥ | A | ɨzɣar | H | qurɣaq | A | turɨ | B | ʒaqən | A |
| **KK-Shege 1** | dʊŋølʲek | B | wʊtkər | B | tɔpər | D | ʒʊmsaq | B | ʉzɣar | H | qurɣaq | A | dʊrʊs | A | ʒaχən | A |
| **KK-Shege 2** | dʊmalak | A | wʉtkər | B | wʊtpɪt | B | ʒʊmsaq | B | ʉzɣar | H | qurɣaq | A | tuːrə | B | ʒaχən | A |
| **KK-Shege 3** | døŋølʲøk | B | wʉtkər | B | tɔpas | D | tʲegiz̥ | A | ɨɣal | D | qurɣaq | A | drs | A | ʒ˳aχən | A |
| **KK-Shege 4** | døŋølʲøk | B | wʉtkər | B | wʉtpɪs | B | tʲegɪz̥ | A | ɨɣal | D | qurɣaq | A | drs | A | ʒaχən | A |
| **U-Hitoy 1** | dɔmalaq | A | wʉtkər | B | wʉtmes | B | tʲeks | A | ɨzɣar | H | qʊrʊq | B | tuːrə | B | ʤaqən | A |
| **U-Hitoy 2** | ajlanʊ | C | wʉtkər | B | wʉtmes | B | tʲeks | A | ʉzɣar | H | qurɣaq | A | dørøs | A | ʤaqən | A |
| **U-Hitoy 3** | døŋelɛk | B | wʉtkər | B | wʉtmes | B | tʲegiz̥ | A | ʉzɣar | H | qurɣaq | A | tuːrɐ | B | ʤaqən | A |
| **U-Novmetan 3** | ajlana | C |  |  |  |  |  |  | hʉl | G | quruq | B | tʉɣrɪ | B | jaqin | A |
| **U-Soy Mahalla 1** | tʊmalak | A | ʉtkɪr | B | ʉtmas | B | silləq | F | hʉl | G | quruq | B | tʊɣrɪ | B | jɒqɪn | A |
| **U-Soy Mahalla 2** | tʊmalɔq | A | ʉtkɨr | B | ʉtmas | B | tiks | A | høl | G | quruq | B | tuɣrɨ | B | jɒqən | A |
| **U-Soy Mahalla 3** | tʊmalaq | A | ʉtkɪr | B | ʉtmas | B |  |  | høl | G | quruq | B | tuɣrə | B | jaqən | A |
| **U-Urtoqqishloq 1** | ajlana | C | ʉtkɪr | B | ʉtmas | B | tekɪs | A | hʉł | G | qʊrʊq | B | tɔɣrə | B | jaqən | A |
| **U-Urtoqqishloq 2** | ajlana | C | wʉtkʊr | B | wʉtmas | B | sillɜq | F | hʉł | G | qʊrʊq | B | tɔɣrə | B | jaqən | A |
| **U-Urtoqqishloq 3** | ajlana | C | ʉtkər | B | wʉtmas | B | sillɜq | F | hʉł | G | qʊrʊq | B | tɔɣrə | B | jaqən | A |
| **U-Urtoqqishloq 4** | ajlana | C | ʉtkər | B | wʉtmas | B | sillɜq | F | hʉł | G | qʊrʊq | B | tɔɣrɪ | B | jaqɪn | A |
| **U-Zarmanak 3** | dumaloχ | A | tʲɪz | D | kund̥ | F | silləq | F | nam | B | quruq | B | tʉɣri | B | jaqin | A |
| **U-Zarmanak 4** | ajlana | C | ʉtkir | B | ʉtmas | B | silləq | F | hʉl | G | quruq | B | tʉɣrə | B | jaqɪn | A |
| **T-Agalyk** | lʉnda | F | tʲez | I | kund | F | sʉfta | R | tar | N | xʉʃk | D | rɔst | H | nazdik | F |
| **T-Kamangaron 1** | lynda | F | tʲes | I | nɔtʲes | L | siłłɪq | F | tar | N | xuʃk | D | rɔst | H | nazdik | F |
| **T-Kamangaron 2** | lønda | F | tez̥ | I | kund̥ | F | silliq | F | tar | N | xyʃk | D | tøɣri | B | nazdik | F |
| **T-Kamangaron 3** |  |  | tes | I | kund | F |  |  | tar | N | xyʃk | D | tuɣri | B | nazdik | F |
| **T-Kamangaron 4** | lønda | F |  |  |  |  |  |  | tar | N | xuʃk | D | rɔst | H | nazdik | F |
| **T-Kaptarhona 1** | kulula | G | tez | I | kønd̥ | F | tɛkkəz | A | tar | N | qɔq | E | tʊɣri | B | qarib̥ | G |
| **T-Kaptarhona 2** | dojra | H | tez | I | kund | F | silləq | F | tar | N | qɔq | E | tuɣri | B | qarib̥ | G |
| **T-Kaptarhona 3** | kəlula | G | tez | I | khʊnd | F | tikkəz̥ | A | tar | N | qɔq | E | tuɣri | B |  |  |
| **T-Kaptarhona 4** | kulula | G | tez | I | kønd | F | tɛks | A | tar | N | qɔq | E | tuɣri | B | qarib̥ | G |
| **T-Kaptarhona 5** | kulula | G | tez̥ | I | kn̩d | F | tɛkkəz̥ | A | tar | N | qɔq | E | tuɣri | B | qarib̥ | G |
| **T-Navdî 1** | gird̥ | I | tez | I | kund̥ | F | rʒ ̩d | S | tar | N | qɔq | E | durust | A | qarib̥ | G |
| **T-Navdî 2** | gird | I | tez | I | kundala | F | rʒ ̩d | S | tar | N | qɔq | E | rɔst | H | qarib̥ | G |
| **T-Navdî 3** | gird | I | tez | I | kund | F | rʒ ̩d | S | tar | N | qɔq | E | rɔst | H | qarib̥ | G |
| **T-Nimich 1** | gird | I | tez | I | kund̥ | F | rʒ ̩d | S | tar | N | qɔq | E | rɔst | H | qarib̥ | G |
| **T-Nimich 2** | gird | I | tez | I | kund | F | rʊʒd | S | tar | N | qɔq | E | rɔst | H | nazdik | F |
| **T-Nimich 3** | gird | I | tez | I | kʊnd̥ | F | rʒ ̩d | S | tar | N | qɔq | E | rɔst | H | qarib̥ | G |
| **T-Nimich 4** | gr̩d | I | tez | I | kʉnd | F | rʒ ̩d | S | tar | N | qɔq | E | rɔst | H | qarip | G |
| **T-Novmetan 1** | gɨrda | I | tʲɪz̥ | I | kund̥ | F |  |  | tar | N | xuʃk | D | tʉɣri | B | nazik | F |
| **T-Novmetan 2** | girda | I | tʲez̥ | I | kund̥ | F | tiks | A | tar | N | xuʃk | D | tuɣri | B | nazik | F |
| **T-Nûshor 1** | gird | I | tez | I | kʊnd | F |  |  | tar | N | qɔq | E | rɔst | H | nazdik | F |
| **T-Nûshor 2** | gird | I | tez | I | kʊnd | F | rɪʒd | S | tar | N | qɔq | E | tʊɣri | B | nazdik | F |
| **T-Nûshor 3** | gr̩d | I | tez | I | kənd | F | rʒ ̩d | S | tar | N | qɔq | E | tʊɣri | B | qarib̥ | G |
| **T-Rishtan 1** | kulula | G | tʲez̥ | I | kund̥ | F | tikkiz̥ | A | thar | N | xuʃk | D | tuɣrə | B | nazdik | F |
| **T-Rishtan 2** | klula | G | tez̥ | I | kund | F | tekkiz̥ | A | tar | N | xuʃk | D | tuɣrə | B | nazdik | F |
| **T-Rishtan 3** | kylylə | G | tʲez̥ | I | kynd̥ | F | sɪłłəq | F | naˑm | B | xʊʃk | D | tuɣrə | B | nazdik | F |
| **T-Shink 1** | lʉnda | F | tɪz̥ | I | kʉnd̥ | F | hamvɔr | T | tar | N | xəʃk | D | tɔɣrɪ | B | nazdɪk | F |
| **T-Shink 2** | kulula | G | tez | I | kʉnd̥ | F | hamvɔr | T | tar | N | xəʃk | D | tʊɣri | B | nazdɪk | F |
| **T-Shink 3** | lʉnda | F | tez | I | kʉnd̥ | F | hamvɔr | T | tar | N | xʉʃk | D | tʊɣri | B | nazdɪk | F |
| **T-Urmetan 1** | davra | J | tɪz | I | kʊnd̥ | F | sillɛq | F | tar | N | xʊʃk | D | tʊɣri | B | nazdɪk | F |
| **T-Urmetan 2** | gird | I | tʲɪz | I | kʉnd̥ | F | hamvɔr | T | tar | N | xʉʃk | D | tʊɣri | B | nazdɪk | F |
| **T-Urmetan 3** | daβra | J | tɪz | I | kʉnd̥ | F | hamvɔr | T | tar | N | xʉʃk | D | dyryst | A | nazdɪk | F |
| **T-Urmetan 4** | lʉnda | F | tɪz̥ | I | kʉnd̥ | F | hamvɔr | T | tar | N | xʉʃk | D | rɔst | H | nazdɪk | F |
| **T-Zarmanak 1** | girda | I | tez | I | kund̥ | F |  |  | tar | N | xuʃk | D | tʉɣri | B | nazik | F |
| **T-Zarmanak 2** | girda | I | tez̥ | I | kund̥ | F | silləq | F | tar | N | xuʃk | D | tʉɣri | B | nazik | F |
| **Y-Dugova 1** | gird | I | tez | I | kʊnt | F | hamvɔr | T | tan | O | qɔq | E | tuɣri | B | nazdik | F |
| **Y-Dugova 2** | girdak | I | tez | I | kunt | F | havɔrak | T | tan | O | qɔq | E | razg | I | nazdik | F |
| **Y-Safedorak 1** | lunda | F | tʲez̥ | I | kʊnd | F | hamvɔr | T | tan | O | qɔq | E | razg | I | nazdik | F |
| **Y-Safedorak 2** | gird | I | tez | I | kʊnt | F | hamvɔr | T | tan | O | qɔq | E | razg | I | nazdik | F |
| **Y-Safedorak 3** |  |  |  |  |  |  |  |  |  |  |  |  |  |  |  |  |

| **Informant** | **far** | | **right** | | **left** | | **name** | | **I** | | **you** | | **he** | | **we** | | **you** | | **they** | |
| --- | --- | --- | --- | --- | --- | --- | --- | --- | --- | --- | --- | --- | --- | --- | --- | --- | --- | --- | --- | --- |
| **Ka-Gazli 1** | ʊzɒq | A | wɔŋ | A | sɔł | A | jisəm | A | mʲen | A | sʲɛn | A | wɔł | A | bizdʲɛr | B | sizdʲɛr | A | olar | A |
| **Ka-Gazli 2** | ʉzaq | A | wɔŋ | A | sɔł | A | at | B | mʲen | A | sʲen | A | u | A | bɪz̥ | A | sɪz̥ | B | ʊlar | A |
| **Ka-Gazli 3** | uzaq | A | wɔŋ | A | sɔl | A | atɜ | B | mʲen | A | sʲen | A | wo | A | bɨzdʲer | B | sɨzdʲer | A | ʊlar | A |
| **Ka-Gazli 4** | uzaq | A | wɔ̃ŋ | A | sʊł | A | at | B | mʲɛn | A | sʲɛn | A | wɔl | A | bizdʲer | B | sizdʲer | A | wolar | A |
| **Ka-Gazli 5** | uzaq | A | wɔ̃ŋ | A | sɔł | A | atɜ | B | mʲen | A | sʲen | A | wɔl | A | bɨz̥ | A | sɨz̥ | B | wɔlar | A |
| **Ka-Gazli 6** | ʊzaq | A | wɔ̃ŋ | A | sɔł | A | atə | B | mʲen | A | sʲen | A | wɔł | A | bɪz̥ | A | sɪz̥ | B | wɔlar | A |
| **Ka-Gazli 7** | ʊzaq | A | wɔŋ | A | sɔł | A | atə | B | mʲen | A |  |  | wɔł | A | bɨrdʲe | B |  |  | wɔlar | A |
| **Ka-Raushan 1** | ɒlɨs | B | wɔŋ | A | sɔl | A | at | B | mʲɪn | A | sʲɪn | A | wɔl | A | bɪzlʲer | B | sɪzdʲer | A | wɔlar | A |
| **Ka-Raushan 2** | ɒlɨs | B | wɔŋ | A | sɔl | A | at | B | mʲen | A | sʲen | A | wɔl | A | bɪz̥ | A | sɪz̥ | B | wɔlar | A |
| **Ka-Raushan 3** | ɒlɨs | B | wɔŋ | A | sɔl | A | at | B | mʲen | A | sʲen | A | wɔl | A | bɪz̥ | A | sɪz̥ | B | wɔlar | A |
| **Ka-Raushan 4** | ɒlɨs | B | wɔŋ | A | sɔl | A | at | B | mʲen | A | sʲen | A | wɔl | A | bɪz̥ | A | sɪz̥ | B | wɔlar | A |
| **Ki-Akmuz 1** | alɨs | B | ɔŋ | A | sɔl | A | at | B | mʲɛn | A | sʲɛn | A | al | A | biz̥ | A | siz̥ | B | alar | A |
| **Ki-Akmuz 2** | alɨs | B | ɔŋ | A | sɔl | A | at | B | mʲɛn | A | sʲɛn | A | al | A | biz̥ | A | siz̥ | B | alar | A |
| **Ki-Akmuz 3** | alɨs | B | ɔŋ | A | sɔl | A | at | B | mʲɛn | A | sʲɛn | A | al | A | biz̥ | A | siz̥ | B | alar | A |
| **Ki-Barskoon** | alɨs | B | ɔŋ | A | sɔl | A | at | B | mʲɛn | A | sʲɛn | A | al | A | biz̥ | A | siz̥ | B | alar | A |
| **Ki-Kulanak 1** | ɒlɨs | B | ɔŋ | A | sɔl | A | ɒt | B | mʲɛn | A | sʲɛn | A | al | A | biz̥ | A | siz̥ | B | ɒlar | A |
| **Ki-Kulanak 2** | ɒlɨs | B | ɔŋ | A | sɔl | A | at | B | mʲɛn | A | sʲɛn | A | al | A | biz̥ | A | siz̥ | B | ɒlar | A |
| **Ki-Kulanak 3** | alɨs | B | ɔŋ | A | sɔl | A | at | B | mʲen | A | sʲen | A | al | A | biz̥ | A | siz̥ | B | alar | A |
| **Ki-Kulanak 4** | alɨs | B | ɔŋ | A | sɔl | A | at | B | mʲen | A | sʲen | A | al | A | biz̥ | A | siz̥ | B | alar | A |
| **Ki-Kulanak 5** | alɨs | B | ɔŋ | A | sɔl | A | at | B | mʲɛn | A | sʲɛn | A | al | A | biz̥ | A | siz̥ | B | alar | A |
| **Ki-Orday 1** | uzɒq | A | ɔŋ | A | sɔl | A | ɒt | B | mʲen | A | sʲen | A | ʊ | A | bɪz̥ | A | sɪz̥ | B | ʊlar | A |
| **Ki-Orday 2** | ɒlɨs | B | ɔŋ | A | ʧap | B | ɒt | B | mʲen | A | sʲen | A | ʊ | A | bɪz̥ | A | sɪz̥ | B | ʊlar | A |
| **Ki-Orday 3** | ɒlɨs | B | ɔŋ | A | ʧap | B | ɒt | B | mʲen | A | sʲen | A | ʊ | A | bɪz̥ | A | sɪz̥ | B | ʊlar | A |
| **Ki-Orday 4** | ɒlɨs | B | ɔŋ | A | sɔl | A | atɨ | B | mʲen | A | sʲen | A | ɒl | A | bɪz̥ | A | sɪz̥ | B | ɒlaʃ | A |
| **Ki-Tamga** | alɨs | B | ɔŋ | A | sɔl | A | at | B | mʲɛn | A | sʲɛn | A | al | A | biz̥ | A | siz̥ | B | alar | A |
| **KK-Halqabad 1** | ɒlɜs | B | wɔŋ | A | ʃɪp | B | at | B | mʲen | A | sʲen | A | wɔl | A | bɪzlʲɛr | B | sɪz̥ | B | wɔlar | A |
| **KK-Halqabad 2** | ʉzaq | A | wɔŋ | A | ʃɪp | B | ism | A | mʲen | A | sʲen | A | wɔl | A | bɪzlʲɛr | B | sɪzlʲɛr | A | wɔlar | A |
| **KK-Halqabad 3** | ʉzaq | A | wɔŋ | A | ʃɪp | B | at | B | mʲen | A | sʲen | A | wɔl | A | bɪz̥ | A | sɪz̥ | B | wɔlar | A |
| **KK-Kokdarya 1** | uzaq | A | wɔŋ | A | sɔl | A | at | B | mʲɛn | A | sʲɛn | A | wɔl | A | bɪz̥ | A | sɪz̥ | B | wolar | A |
| **KK-Kokdarya 2** | uzaq | A | wɔŋ | A | ʃɪp | B | at | B | mʲen | A | sʲen | A | wɔl | A | bɪzlʲɛr | B | sɪzlʲɛr | A | wolar | A |
| **KK-Kokdarya 3** | ɒlɨs | B | wɔŋ | A | ʃɪp | B | atɨ | B | mʲen | A | sʲen | A | wɔl | A | bɪzlʲɛr | B | sɪzlʲɛr | A | wolar | A |
| **KK-Kokdarya 4** | uzaq | A | wɔŋ | A | sɔl | A | at | B | mʲen | A | sʲen | A | wɔl | A | bɪzlʲer | B | sɪzlʲer | A | wolar | A |
| **KK-Shege 1** | ɒlɜs | B | wɔŋ | A | ʃɪp | B | ism | A | mʲen | A | sʲen | A | wɔl | A | bɪzlʲer | B | sɪzlʲer | A | wɔlar | A |
| **KK-Shege 2** | uzaq | A | wɔŋ | A | ʃɪp | B | at | B | mʲen | A | sʲen | A | wɔl | A | bɪzlʲer | B | sɪzlʲer | A | wɔlar | A |
| **KK-Shege 3** | ɒlɨs | B | wɔŋ | A | ʃɪp | B | at | B | mʲen | A | sʲen | A | wɔl | A | bɪzlʲɛr | B | sɪzlʲɛr | A | wɔlar | A |
| **KK-Shege 4** | ʉzaq | A | wɔŋ | A | sɔl | A | at | B | mʲen | A | sʲen | A | wɔl | A | bɪzlʲɛr | B | sɪzlʲɛr | A | wɔlar | A |
| **U-Hitoy 1** | uzaq | A | wɔŋ | A | sɔl | A | at | B | mʲen | A | sʲen | A | wɔl | A | bɪz̥ | A | sɪz̥ | B | wolar | A |
| **U-Hitoy 2** | ʊzaq | A | wɔŋ | A | sɔl | A | at | B | mʲen | A | sʲen | A | wɔl | A | bɪzlʲer | B | sɪzlʲer | A | wɔlar | A |
| **U-Hitoy 3** | alɜs | B | wɔŋ | A | ʧɪp | B | at | B | mʲen | A | sʲen | A | wɔl | A | bɪzlʲer | B | sɪzlʲer̯ | A | wɔlar | A |
| **U-Novmetan 3** | uzɔq | A | ʉŋa | A | ʧap | B | ism | A | mʲɛn | A | sen | A | u | A | bizlar | B | sɨz | B | ular | A |
| **U-Soy Mahalla 1** | uzɒq | A | ɔŋ | A | ʧap | B | ism | A | mʲɛn | A | sʲɛn | A | ʊ | A | bɪz̥ | A | sɪz̥ | B | ʊlar | A |
| **U-Soy Mahalla 2** | uzɒq | A | wɔŋ | A | ʧap | B | nɔm | C | mʲen | A | sʲen | A | ʊ | A | bɨz̥ | A | sɨz̥ | B | ular | A |
| **U-Soy Mahalla 3** | uzaq | A | wɔŋ | A | ʧap | B | isəm | A | mʲen | A | sʲen | A | ʊ | A | bɨz̥ | A | sɨz̥ | B | ular | A |
| **U-Urtoqqishloq 1** | uzɔq | A | wʊŋ | A | ʧap | B | ism̩ | A | mʲɛn | A | sʲɛn | A | u | A | bɪz̥ | A | sɪz̥ | B | ular | A |
| **U-Urtoqqishloq 2** | uzɒq | A | wʊŋ | A | ʧap | B | wɔt | B | mʲen | A | sʲen | A | u | A | bɪs | A | sɪzlar | A | ʊlar | A |
| **U-Urtoqqishloq 3** | uzɔq | A | wʊŋ | A | ʧap | B | ism̩ | A | mʲen | A | sʲen | A | ʊ | A | bɪzlar | B | sɪzlar | A | ʊlar | A |
| **U-Urtoqqishloq 4** | uzɒq | A | ʊŋ | A | ʧap | B | wɔt | B | mʲen | A | sʲen | A | ʊ | A | bez | A | sɪz̥ | B | ʊlar | A |
| **U-Zarmanak 3** | uzɔq | A | uŋ | A | ʧap | B | ism | A | mʲen | A | sʲen | A | u | A | bizlar | B | sizlar | A | ular | A |
| **U-Zarmanak 4** | uzɔq | A | ʉŋ | A | ʧap | B | isəm | A | mʲɛn | A |  |  | u | A | bɨz̥ | A |  |  | ular | A |
| **T-Agalyk** | dur | E | rɔst | B | ʧap | B | nɔm | C | man | B | tu | B | ɔn | B | mɔ | D |  |  | ɔnhɔ | B |
| **T-Kamangaron 1** | dyr | E | rɔst | B | ʧap | B | nɔm | C | man | B | tu | B | vaj | C | mɔhɔn | E | ʃumɔjɔn | D | vajhɔ | C |
| **T-Kamangaron 2** | dur | E | rɔst | B | ʧap | B | nɔm | C | man | B | tu | B | vaj | C | mɔ | D | ʃumɔ | C | unɔ | D |
| **T-Kamangaron 3** | dur | E | rɔst | B | ʧap | B | nɔm | C | man | B | tu | B |  |  | mɔhɔn | E |  |  | vajhɔ | C |
| **T-Kamangaron 4** | dur | E | rɔst | B | ʧap | B | nɔm | C | man | B | tu | B | vaj | C | mɔhɔ̃n | E | ʃumɔhɔn | D | vajhɔ | C |
| **T-Kaptarhona 1** | dur | E | rɔst | B | ʧap | B | nom | C | man | B | tɨ | B | vaj | C |  |  | ʃumɔ | C | βajɔ | C |
| **T-Kaptarhona 2** | dur | E | rɔst | B | ʧap | B | nɔm | C | man | B | tu | B | vaj | C | mɔ | D | ʃumɔ | C | vajɔ | C |
| **T-Kaptarhona 3** | dur | E | rɔst | B | ʧap | B | nʊm | C | man | B |  |  | vajɔ | C | mɔ | D | ʃumɔ | C | vajɔ | C |
| **T-Kaptarhona 4** | dur | E | rɔst | B | ʧap | B | nɔm | C | man | B | tø | B | vaj | C | mɔ | D | ʃumɔ | C | vajɔ | C |
| **T-Kaptarhona 5** | dur | E | rɔst | B | ʧap | B | num | C | mɛn | B | tø | B | vaj | C | mɔ | D | ʃumɔ | C | vajɔ | C |
| **T-Navdî 1** | dur | E | rɔst | B | ʧap | B | nɔm | C | man | B | tu | B | vaj | C | mɔ | D | ʃumɔ | C | ɔnhɔ | B |
| **T-Navdî 2** | dur | E | rɔst | B | ʧap | B | nɔm | C | mn̩ | B | tʊ | B | vaj | C | mɔ | D | ʃumɔ | C | ɔnhɔ | B |
| **T-Navdî 3** | dur | E | rɔst | B | ʧap | B | nɔm | C | man | B |  |  | vaj | C | mɔjɔn | E | ʃumɔ | C | ɔnhɔ | B |
| **T-Nimich 1** | dur | E | rɔst | B | ʧap | B | nɔm | C | man | B |  |  | vaj | C | mɔ | D | ʃumɔ | C | ɔnhɔ | B |
| **T-Nimich 2** | dur | E | rɔst | B | ʧap | B | nɔm | C | man | B | tʊ | B | vaj | C | mɔˑ | D | ʃumɔ | C | ɔnhɔ | B |
| **T-Nimich 3** | dur | E | rɔst | B | ʧap | B | nʊm | C | man | B | tʊ | B | ʊ | A | mɔ | D | ʃumɔ | C | ɔnhɔ | B |
| **T-Nimich 4** | dur | E | rɔst | B | ʧap | B | num | C | mn̩ | B | tə | B | ʊ | A | mɔ | D | ʃmɔ | C | ʊwɔ | E |
| **T-Novmetan 1** | dur | E | rɔst | B | ʧap | B | nɔ̃m | C | mʲɛn | B | tu | B | in | D | mɔhɔ | E | ʃumɔː | C | unɔ | D |
| **T-Novmetan 2** | dur | E | rɔst | B | ʧap | B | nɔm | C | man | B | tu | B | vaj | C | mɔhɔ | E | ʃumɔhɔ | D |  |  |
| **T-Nûshor 1** | dur | E | rɔst | B | ʧap | B | nɔm | C | man | B | tu | B | ɔn | B | mɔ | D | ʃmɔ | C | ʊwɔ | E |
| **T-Nûshor 2** | dur | E | rɔst | B | ʧab̥ | B | nɔm | C | man | B |  |  |  |  |  |  | ʃumɔ | C | ɔnhɔ | B |
| **T-Nûshor 3** | dur | E | rɔst | B | ʧap | B | num | C | mən | B | tə | B | ʊ | A | mɔ | D | ʃʊmɔ | C | uvɔ | E |
| **T-Rishtan 1** | dur | E | rɔst | B | ʧap | B | nɔm | C | man | B | tʊ | B | vaj | C | mo | D |  |  | vajhɔ | C |
| **T-Rishtan 2** | dur | E | rɔst | B | ʧap | B | nɔm | C | man | B | tʊ | B | vaj | C | mɔ | D | ʃumɔ | C | vajhɔ | C |
| **T-Rishtan 3** | dur | E | rɔst | B | ʧap | B | nɔm | C | man | B | ty | B | vaj | C | mɔhɔ | E | ʃumɔ | C | vajhɔ | C |
| **T-Shink 1** | dr̩ | E | rɔst | B | ʧap | B | nɔm | C | man | B | tø | B | vaj | C | mɔjɔn | E | ʃumɔ | C | ɔnhɔ | B |
| **T-Shink 2** | dʊr | E | rɔst | B | ʧap | B | nɔm | C | man | B | tø | B | vaj | C | mɔ | D | ʃymɔ | C | ɔnhɔ | B |
| **T-Shink 3** | dr̩ | E | rɔst | B | ʧap | B | nɔm | C | man | B | tø | B | vaj | C | mɔjɔn | E | ʃymɔjɔn | D | ɔnhɔ | B |
| **T-Urmetan 1** | dʊr | E | rɔst | B | ʧap | B | nɔm | C | man | B | tø | B | vaj | C | mɔː | D | ʃumɔː | C | ɔnhɔ | B |
| **T-Urmetan 2** | dʊr | E | rɔst | B | ʧap | B | nɔm | C | man | B | tø | B | vaj | C | mɔhɔ | E | ʃumɔː | C | ɔnhɔ | B |
| **T-Urmetan 3** | dr̩ | E | rɔst | B | ʧap | B | nɔm | C | man | B | tø | B | vaj | C | mɔˑ | D | ʃʊmɔjɔn | D | ɔnhɔ | B |
| **T-Urmetan 4** | dr̩ | E | rɔst | B | ʧap | B | nɔm | C | man | B | tø | B | ɔn | B | mɔ | D | ʃymɔ | C | ɔnhɔ | B |
| **T-Zarmanak 1** | dur | E | rɔst | B | ʧap | B | nɔm | C | man | B |  |  | vaj | C | mɔhɔ | E | ʃumɔ | C | uno | D |
| **T-Zarmanak 2** | dur | E | rɔst | B | ʧap | B | nɔm | C | man | B | tu | B | vaj | C | mɔː | D | ʃumɔ | C | unɔ | D |
| **Y-Dugova 1** | dʉr | E | raska | C | ʧappa | D | num | C | man | B | tʊ | B | vaj | C | mɔː | D | ʃʊmɔː | C | onhɔ | B |
| **Y-Dugova 2** | dur | E | raska | C | ʧappa | D | nɔm | C | man | B | tø | B | ax | E | mɔx | F |  |  | axtit | F |
| **Y-Safedorak 1** | dʊr | E | raska | C | ʧaˑpa | D | num | C | man | B | tu | B | ax | E | mox | F | ʃumɔx | E | axtit | F |
| **Y-Safedorak 2** | dur | E | raska | C | ʧappa | D | num | C | man | B | tu | B | ax | E | mɔx | F | ʃʊmɔx | E | axtit | F |
| **Y-Safedorak 3** |  |  |  |  |  |  |  |  | man | B | tʊ | B | ax | E | mɔx | F | ʃʊmɔx | E | axtit | F |

| **Informant** | **who ?** | | **what ?** | | **where ?** | | **when ?** | | **how ?** | | **not** | | **other** | |
| --- | --- | --- | --- | --- | --- | --- | --- | --- | --- | --- | --- | --- | --- | --- |
| **Ka-Gazli 1** | kɪm | A | nʲe | A | qajda | A | qaʃan | A | qɒlaj | A | ʒɔq | A | bɒsqa | A |
| **Ka-Gazli 2** | kəm | A | newe | B | qaʒerdʲe | B | qaʃan | A | qandaj | B | ʒɔq | A | basqa | A |
| **Ka-Gazli 3** | kəm | A | nʲɪ | A | qajʒerdʲe | B | qaʃan | A | qalaj | A | ʒɔq | A | basxa | A |
| **Ka-Gazli 4** | kəm | A | nʲe | A | qajda | A | qaʃan | A | qalaj | A | ʒɔq | A | basqa | A |
| **Ka-Gazli 5** | kɨm | A | nʲɪ | A | kajzʲɛrdɪ | B | qaʃan | A | qałaj | A | ʒɔq | A | basqa | A |
| **Ka-Gazli 6** | kəm | A | nʲe | A | qajda | A | qaʃan | A | qandaj | B | ʒɔq | A | basqa | A |
| **Ka-Gazli 7** | kəm | A | nʲɪ | A | qajda | A | qajerta | B | qalaj | A | ʒɔq | A | basqa | A |
| **Ka-Raushan 1** | kɨm | A | nʲe | A | qajda | A | qaʃan | A | qalaj | A | ʒɔq | A | basqa | A |
| **Ka-Raushan 2** | kɨm | A | nʲe | A | qajʒʲɛrde | B | qajwaχta | C | qalaj | A | ʒɔq | A | basχa | A |
| **Ka-Raushan 3** | kɨm | A | nʲe | A | qajda | A | qaʃan | A | qalaj | A | ʒɔq | A | basχa | A |
| **Ka-Raushan 4** | kɨm | A | nʲe | A | qajda | A | qaʃan | A | qandaj | B | ʒɔq | A | basqa | A |
| **Ki-Akmuz 1** | kʲɪm | A | ɛmnɛ | C | qajda | A | qaʧan | A | qandaj | B | ʤɔq | A | baʃqa | A |
| **Ki-Akmuz 2** | kʲɪm | A | ɛmnɛ | C | qajda | A | qaʧan | A | qandaj | B | ʤɔq | A | baʃqa | A |
| **Ki-Akmuz 3** | gʲɪm | A | ɛmnɛ | C | qajda | A | qaʧan | A | qandaj | B | ʤɔq | A | baʃqa | A |
| **Ki-Barskoon** | kʲɪm | A | ɛmnɛ | C | qajda | A | qaʧan | A | qandaj | B | ʤɔq | A | basqa | A |
| **Ki-Kulanak 1** | kʲɪm | A | ɛmnɛ | C | qajsɨʤɛrdʲɛ | B | qaʧɒn | A | qandaj | B | ʤɔq | A | baʃqa | A |
| **Ki-Kulanak 2** | gʲɪm | A | ɛmnɛ | C | qajda | A | qaʧan | A | qandaj | B | ʤɔq | A | baʃqa | A |
| **Ki-Kulanak 3** | gʲɪm | A | emnɛ | C | qajda | A | qajdan | J | qandaj | B | ʤɔq | A | baʃqa | A |
| **Ki-Kulanak 4** | gʲɪm | A | ɛmnɛ | C | qajda | A | qaʧan | A | qandaj | B | ʤɔq | A | baʃqa | A |
| **Ki-Kulanak 5** | kʲɪm | A | ɛmnɛ | C | qajda | A | qaʧan | A | qandaj | B | ʤɔq | A | baʃqa | A |
| **Ki-Orday 1** | gʲɪm | A | ɛmnɛ | C | qajɛrda | B | qaʧan | A | qandaj | B | ʤɔk | A | bɒʃka | A |
| **Ki-Orday 2** | gʲim | A | ɛmnɛ | C | qajʒɛrda | B | qaʧan | A | qandaj | B | ʤɔk | A | bøløk | B |
| **Ki-Orday 3** | kim | A | nemɛ | D | qajɛrda | B | qaʧan | A | qandaj | B | ʤɔk | A | bɒʃka | A |
| **Ki-Orday 4** | kʲɪm | A | emne | C | qajɛrdʲe | B | qaʧɒn | A | qandaj | B | ʤɔk | A | bɒʃqa | A |
| **Ki-Tamga** | kʲɪm | A | ɛmnɛ | C | qajda | A | qaʧan | A | qandaj | B | ʤɔq | A | baʃqa | A |
| **KK-Halqabad 1** | kʉmɔ | A | nʲe | A | qajʒʲɛrdʲe | B | qaʃan | A | qalaj | A | ʒɔq | A | basqa | A |
| **KK-Halqabad 2** | kɨm | A | nʲe | A | qajʒʲɛrdʲe | B | qaʃan | A | qalaj | A | ʒɔq | A | basχa | A |
| **KK-Halqabad 3** | kɨm | A | nʲe | A | qajɛrdʲe | B | qajwaxta | C | qalaj | A | ʒɔq | A | basχa | A |
| **KK-Kokdarya 1** | kɨm | A | nʲe | A | qajɛrdʲe | B | qasan | A | qandaj | B | ʒɔq | A | bɒsqa | A |
| **KK-Kokdarya 2** | kɨm | A | nʲɪ | A | qajda | A | qaʃan | A | qalaj | A | ʒɔq | A | basqa | A |
| **KK-Kokdarya 3** | kɨm | A | nʲe | A | qajda | A | qaʃan | A | qandaj | B | ʒɔq | A | basqa | A |
| **KK-Kokdarya 4** | kɨm | A | nʲe | A | qajʒʲɛrdʲe | B | qaʃan | A | qalaj | A | ʒɔq | A | basχa | A |
| **KK-Shege 1** | kɨm | A | nʲe | A | qajʒʲɛrde | B | qaʃan | A | qalaj | A | ʒɔq | A | baʃqa | A |
| **KK-Shege 2** | kɨm | A | nʲe | A | qajʒʲɛrde | B | qaʃan | A | qalaj | A | ʒɔq | A | basχa | A |
| **KK-Shege 3** | kɨm | A | nʲe | A | qajʒʲɛrdʲe | B | qaʃan | A | qalaj | A | ʒ˳ɔq | A | basχa | A |
| **KK-Shege 4** | kɨm | A | nʲe | A | qajda | A | qaʃan | A | qalaj | A | ʒɔq | A | basχa | A |
| **U-Hitoy 1** | kɨm | A | nʲe | A | qajɛrdʲe | B | qaʧan | A | qandaj | B | ʤɔq | A | baʃχa | A |
| **U-Hitoy 2** | kɨm | A | nʲe | A | qajɛrdʲe | B | qaʧan | A | qandaj | B | jɒq | A | baʃqa | A |
| **U-Hitoy 3** | kɨm | A | nʲe | A | qajɛrdʲɛ | B | qaʧan | A | qalaj | A | ʤɔq | A | baʃχa | A |
| **U-Novmetan 3** | kim | A |  |  | kajɛrda | B | qaʧɔn | A |  |  | jɔq | A | bɔʃqa | A |
| **U-Soy Mahalla 1** | kʲɪm | A | ɛmnɛ | C | qajʤerda | B | qaʧan | A | qandaj | B | jɔq | A | bɒsqa | A |
| **U-Soy Mahalla 2** | kʲɪm | A | nemɛ | D | qajɛrda | B | qaʧɒn | A | qandaj | B | jɔq | A | bɒsqa | A |
| **U-Soy Mahalla 3** | kim | A | nəmɛ | D | qajɛrda | B | qaʧɒn | A | qandaj | B | jɔq | A | bɔʃqa | A |
| **U-Urtoqqishloq 1** | kim | A | nɪma | D | qajɛrda | B | qaʧɔn | A | qandaj | B | jɔq | A | bɔʃqa | A |
| **U-Urtoqqishloq 2** | kim | A | nɪma | D | qajɛrda | B | qaʧɔn | A | qandaj | B | jɔq | A | bɔʃqa | A |
| **U-Urtoqqishloq 3** | kim | A | nɪma | D | qajɛrda | B | qaʧɔn | A | qandaj | B | jɔq | A | bɔʃχa | A |
| **U-Urtoqqishloq 4** | kim | A | nɪma | D | qajɛrda | B | qaʧɔn | A | qandaj | B | jɔq | A | bɒʃqa | A |
| **U-Zarmanak 3** | kim | A | nɪma | D | qajɛrda | B | qaʧɔn | A | qandaj | B | jɔq | A | bɔʃqa | A |
| **U-Zarmanak 4** | kim | A | nɨma | D | qajɛrda | B | qaʧɔn | A | qandaj | B | jɔq | A | boʃqa | A |
| **T-Agalyk** | ki | B | ʧi | F | kuʤɔ | C | kaj | D | ʧitaβr | F | ne | B | digar | E |
| **T-Kamangaron 1** | ki | B | ʧi | F | guʤɔnda | D | kadomvaxt | E | ʧxel | G | nʲes | C | digar | E |
| **T-Kamangaron 2** | ki | B | ʧi | F | guʤɔva | E | kajba | F | ʧxel | G | ne | B | digar | E |
| **T-Kamangaron 3** |  |  | ʧi | F | kuʧɔva | E | kajba | F | ʧtu | H | nʲe | B | digar | E |
| **T-Kamangaron 4** | ki | B | ʧi | F | guʤɔwa | E | kaj | D | ʧxel | G | ne | B | digar | E |
| **T-Kaptarhona 1** | kiaj | C | ʧiaj | G | dagiʤɔ | F | kaj | D | ʧiː | I | nʲest[[42]](#footnote-43) | C | digaʃ | E |
| **T-Kaptarhona 2** | ki | B | ʧi | F | darguʒɔ | F | kaj | D | istarɔn | J | nʲest | C | digar | E |
| **T-Kaptarhona 3** | kiaj | C | ʧiaj | G | dargiʤɔ | F | kaj | D | istɔrɔ | J | nʲest | C | digar | E |
| **T-Kaptarhona 4** | ki | B | ʧi | F | tagiʤɔ | F | kaj | D | isrɔ | J | nʲes | C | digar | E |
| **T-Kaptarhona 5** | ki | B | ʧi | F | dagiʤʲɔ | F | kaj | D | istruki | K | nʲɛ | B | digaʃ | E |
| **T-Navdî 1** | kiː | B | ʧiː | F | darkuʤɔ | F | kaj | D | ʧigʊna | L | ne | B | digar | E |
| **T-Navdî 2** | kiː | B | ʧiː | F | darkuʤɔ | F | kaj | D | ʧxel | G | ne | B | digar | E |
| **T-Navdî 3** | kiː | B | ʧiː | F | kuʤɔva | D | kaj | D | ʧxel | G | nezd | C | digar | E |
| **T-Nimich 1** | kiː | B | ʧiː | F | kuʤɔβa | D | kaj | D | ʧxel | G | ne | B | digar | E |
| **T-Nimich 2** | kiˑ | B | ʧiː | F | darkuʤɔ | F | kadomvaxt | E | ʧxel | G | nest | C |  |  |
| **T-Nimich 3** | kiː | B | ʧiː | F | darkuʤɔ | F | kaj | D | ʧxel | G | nest | C | digar | E |
| **T-Nimich 4** | kiː | B | ʧiː | F | darkʉʤɔ | F | kaj | D | ʧxel | G | nest | C | dəgar | E |
| **T-Novmetan 1** | ki | B |  |  | giʤʲoba | E | kaj | D | ʧinaw | M | ne | B | digar | E |
| **T-Novmetan 2** |  |  |  |  |  |  | kajba | F | ʧtʉ | H | ne | B |  |  |
| **T-Nûshor 1** | kiː | B | ʧiː | F | darkuʤɔ | F | kaj | D | ʧxel | G | ne | B | digar | E |
| **T-Nûshor 2** | kiː | B | ʧiː | F | kuʤɔ | C | kaj | D |  |  | nest | C | digar | E |
| **T-Nûshor 3** | kiː | B | ʧiː | F | darkuʤɔ | F | kaj | D | ʧxɪl | G | ne | B | digar | E |
| **T-Rishtan 1** | ki | B | sʲeˑ | F | guʤɔnda | D | kaj | D | ʧʲitʲin | N | ne | B | digar | E |
| **T-Rishtan 2** | ki | B | ʧi | F | guʤɔnda | D | kaj | D | ʧxɛl | G | nʲɛst | C | digar | E |
| **T-Rishtan 3** | ki | B | seː | F | guʤɔnda | D | kajβa | F | ʧtin | N | nʲe | B |  |  |
| **T-Shink 1** | kɪst | B | ʧist | F | kane | G | kaj | D | ʧxel | G | nɪst | C | digar | E |
| **T-Shink 2** | kiː | B | ʧiː | F | guʤɔba | E | kaj | D | ʧxel | G | ne | B | digar | E |
| **T-Shink 3** | kiː | B | ʧiː | F | kʊʒɔ | C | kaj | D | ʧxel | G | nɪst | C | digar | E |
| **T-Urmetan 1** | kiː | B | ʧiː | F | kuʤoba | E | kajvaxt | G | ʧxel | G | nest | C | digar | E |
| **T-Urmetan 2** | kʲiː | B | ʧiː | F | kane | G | kaj | D | ʧxel | G | ne | B | digar | E |
| **T-Urmetan 3** | kiː | B | ʧiː | F | kyʤɔ | C | kaj | D | ʧxel | G | nest | C | digar | E |
| **T-Urmetan 4** | kiː | B | ʧiː | F | guʤɔ | C | kadomvaxt | E | ʧxel | G | nəʃə | C | digar | E |
| **T-Zarmanak 1** | kiː | B | ʧiː | F | giʤoba | E | kaj | D | ʧtə | H | ne | B | digiʃ | E |
| **T-Zarmanak 2** | ki | B | ʧi | F | guʤɔba | E | kaj | D | ʧtə | H | ne | B | diga | E |
| **Y-Dugova 1** | kiː | B |  |  | kuʤoba | E | kadomvaxt | E | ʧixel | G | nʲist | C | digar | E |
| **Y-Dugova 2** | kax | E | ʧɔx | H | kʊ | H | kad | H | ʧʉtti | O | naː | B | ani | F |
| **Y-Safedorak 1** | kax | E | ʧɔ | H | kumɔka | I | kad | H | ʧuti | O | na | B | ani | F |
| **Y-Safedorak 2** | kax | E | ʧɔ | H | kumɔkɔ | I | kad | H | ʧuti | O | naː | B | ani | F |
| **Y-Safedorak 3** | kax | E | ʧɔː | H | kumɔka | I | kad | H | ʧutti | O | naˑ | B | axti | G |

1. ‘delay’ (muddat). [↑](#footnote-ref-2)
2. ‘fat’ (farbeh). [↑](#footnote-ref-3)
3. ‘many’ + ‘time.’ [↑](#footnote-ref-4)
4. ‘prolonged.’ [↑](#footnote-ref-5)
5. ‘not enough.’ [↑](#footnote-ref-6)
6. murg: ‘hen.’ [↑](#footnote-ref-7)
7. ‘uncle.’ [↑](#footnote-ref-8)
8. ‘sparrow.’ [↑](#footnote-ref-9)
9. ‘log.’ [↑](#footnote-ref-10)
10. navda: ‘small branch.’ [↑](#footnote-ref-11)
11. zardolu: ‘apricot.’ [↑](#footnote-ref-12)
12. ič: ‘entrails.’ [↑](#footnote-ref-13)
13. budžulak: ‘patella.’ [↑](#footnote-ref-14)
14. mi-: imperfective prefix. [↑](#footnote-ref-15)
15. Imperative form. [↑](#footnote-ref-16)
16. Here: xurdan ‘to eat; to drink.’ [↑](#footnote-ref-17)
17. ‘to understand.’ [↑](#footnote-ref-18)
18. ‘wrestling.’ [↑](#footnote-ref-19)
19. džaŋ: ‘war.’ [↑](#footnote-ref-20)
20. lat: ‘knock.’ [↑](#footnote-ref-21)
21. ‘life’ (umr). [↑](#footnote-ref-22)
22. obbozi: ‘to go bathing.’ [↑](#footnote-ref-23)
23. *reza kardan* ‘crumb + to make’ or from Russian *rezat’* (?). [↑](#footnote-ref-24)
24. Reflective form. [↑](#footnote-ref-25)
25. toza kardan: ‘to clean.’ [↑](#footnote-ref-26)
26. qoq kardan: ‘to dry.’ [↑](#footnote-ref-27)
27. pahš kardan: ‘to mash, to squeeze.’ [↑](#footnote-ref-28)
28. xoidan: ‘to chew, to gnaw.’ [↑](#footnote-ref-29)
29. zer kardan: ‘to mash, to squeeze.’ [↑](#footnote-ref-30)
30. madžak kardan: ‘to mash.’ [↑](#footnote-ref-31)
31. ɣidžim kardan: ‘to knead.’ [↑](#footnote-ref-32)
32. -gin: imperative 2s. [↑](#footnote-ref-33)
33. gaplaš-: ‘to converse.’ [↑](#footnote-ref-34)
34. bajt: ‘distich.’ [↑](#footnote-ref-35)
35. šer: ‘poem.’ [↑](#footnote-ref-36)
36. tuproq: ‘earth, soil.’ [↑](#footnote-ref-37)
37. balandi: ‘hill.’ [↑](#footnote-ref-38)
38. kečqurun: ‘evening.’ [↑](#footnote-ref-39)
39. toriki: ‘darkness.’ [↑](#footnote-ref-40)
40. jaroqsiz: ‘unsuitable.’ [↑](#footnote-ref-41)
41. bezeb: ‘ugly.’ [↑](#footnote-ref-42)
42. ‘there is no …’ [↑](#footnote-ref-43)
